# Supplementary material for: Factors related to job burnout among older nurses in Guizhou province, China
Source: PeerJ. 2021 Oct 21;9:e12333. doi: 10.7717/peerj.12333 (PMC8542368; doi:10.7717/peerj.12333)
Supplement: Supplemental Information 1 [file peerj-09-12333-s001.xls]

## Sheet: Sheet1
Serial number	1.Age		2.Gender		3.Educational background		4.Job title	5.Duties	6.Department	7.Work year	8.Monthly income	9.Average night shift	10.Method of appointment	11.Marital status	12.Number fo child	13.Specialist nurse	14.Level of hospitals	Nursing profession and work problems	Time allocation and workload	Working environment and equipment Problems	Patient care issues	Management and interpersonal problems	Job stressors scores	Emotional exhaustion	Personification	Personal accomplishment	Job burnout scores	Professional identity scores	Professional identity evaluation	Professional social support	Social skill	Dealing with professional frustration	Professional self-reflection
1	45		Female		Junior college		Senior nurse	No	Outpatient	20	3000～5999	3	Contract	Married	2	No	Secondary hospital	18	13	7	26	22	86	33	15	27	75	91	27	19	18	19	8
2	40		Female		Junior college		Nurse	No	Pediatrics	18	6000～8999	0	Contract	Married	1	No	Secondary hospital	28	20	12	44	36	140	24	8	12	44	118	34	24	24	24	12
3	40		Female		Technical secondary school		Senior nurse	No	Integrated ICU	20	3000～5999	3	Contract	Married	2	No	Secondary hospital	23	17	9	32	21	102	46	13	18	77	95	23	22	20	21	9
4	44		Female		Undergraduate		Co-chief superintendent nurse	Deputy Director/Director of Nursing	Nursing Department	24	6000～8999	2	Employed	Married	1	No	Secondary hospital	23	11	3	17	11	65	10	5	10	25	132	41	27	23	28	13
5	45		Female		Junior college		Senior nurse	No	Infectious Diseases	27	3000～5999	3	Employed	Divorced	1	No	Secondary hospital	21	15	9	34	17	96	41	20	21	82	86	22	22	15	18	9
6	41		Male		Undergraduate		Senior nurse	No	ICU	19	3000～5999	3	Employed	Unmarried	0	No	Secondary hospital	7	5	3	13	16	44	19	8	46	73	51	15	10	10	11	5
7	48		Female		Undergraduate		Co-chief superintendent nurse	Deputy Director/Director of Nursing	Nursing Department	29	6000～8999	2	Employed	Married	1	Yes	Tertiary hospitals	18	15	10	20	13	76	44	13	22	79	117	33	24	24	24	12
8	48		Female		Junior college		Co-chief superintendent nurse	Head nurse	Sterile supply room	28	9000～11999	0	Employed	Married	1	No	Secondary hospital	10	6	3	17	12	48	16	7	24	47	105	30	22	19	22	12
9	51		Female		Technical secondary school		Senior nurse	No	Accupuncture	28	6000～8999	0	Employed	Married	0	No	Secondary hospital	23	15	8	29	30	105	16	6	18	40	114	34	26	19	22	13
10	46		Female		Junior college		Supervisor nurse	Head nurse	surgical	26	3000～5999	0	Employed	Married	2	No	Secondary hospital	12	17	4	25	15	73	22	6	16	44	94	21	20	19	24	10
11	45		Female		Junior college		Supervisor nurse	Head nurse	Internal Medicine	27	3000～5999	0	Compile	Married	1	No	Secondary hospital	13	7	3	24	12	59	13	7	12	32	137	44	26	25	28	14
12	45		Female		Junior college		Supervisor nurse	Head nurse	Supply Room	24	3000～5999	0	Employed	Married	1	No	Secondary hospital	9	12	7	15	19	62	26	9	14	49	114	35	22	23	23	11
13	43		Female		Junior college		Co-chief superintendent nurse	Head nurse	Pediatrics	22	6000～8999	3	Employed	Married	1	No	Secondary hospital	22	16	8	29	23	98	18	13	17	48	116	33	25	24	24	10
14	40		Female		Junior college		Senior nurse	No	Internal Medicine	18	3000～5999	3	Contract	Unmarried	0	No	Secondary hospital	9	17	5	16	15	62	33	24	25	82	97	29	21	19	20	8
15	48		Female		Junior college		Supervisor nurse	No	Nursing Department	28	6000～8999	0	Employed	Married	1	No	Secondary hospital	10	8	6	41	31	96	19	6	22	47	91	23	19	20	19	10
16	47		Female		Junior college		Co-chief superintendent nurse	Other	Pharmacy	27	9000～11999	0	Employed	Married	1	No	Secondary hospital	28	20	8	31	23	110	15	5	9	29	137	32	30	30	30	15
17	55		Female		Undergraduate		Co-chief superintendent nurse	Other	Science and Education Office	33	6000～8999	0	Employed	Married	1	No	Secondary hospital	21	16	9	32	28	106	38	20	19	77	126	38	26	26	25	11
18	49		Female		Technical secondary school		Co-chief superintendent nurse	No	Internal Medicine	28	3000～5999	0	Employed	Married	1	Yes	Tertiary hospitals	27	18	11	44	36	136	24	15	34	73	116	34	24	22	24	12
19	47		Female		Junior college		Co-chief superintendent nurse	No	Department of Internal Medicine	27	6000～8999	0	Employed	Married	1	No	Secondary hospital	16	14	7	34	24	95	28	8	14	50	99	26	22	20	21	10
20	47		Female		Undergraduate		Co-chief superintendent nurse	No	Oncology	28	6000～8999	0	Employed	Married	1	No	Tertiary hospitals	24	19	11	36	24	114	39	22	30	91	88	23	19	18	17	11
21	48		Female		Junior college		Co-chief superintendent nurse	No	Major Surgery	26	6000～8999	0	Employed	Married	1	No	Secondary hospital	24	18	7	37	27	113	27	8	16	51	106	31	24	21	21	9
22	47		Female		Undergraduate		Co-chief superintendent nurse	No	Oncology	28	6000～8999	0	Employed	Married	1	No	Tertiary hospitals	24	19	11	36	24	114	39	22	30	91	88	23	19	18	17	11
23	47		Female		Junior college		Co-chief superintendent nurse	Head nurse	Outpatient department	28	6000～8999	1	Employed	Married	1	No	Secondary hospital	19	15	8	39	24	105	28	7	31	66	109	30	27	21	20	11
24	55		Female		Undergraduate		Co-chief superintendent nurse	Head nurse	Operating room	33	9000～11999	0	Employed	Married	1	Yes	Tertiary hospitals	28	20	10	33	31	122	48	15	22	85	104	25	22	22	25	10
25	41		Female		Undergraduate		Supervisor nurse	Head nurse	Obstetrics and Gynecology	22	3000～5999	2	Employed	Unmarried	1	Yes	Secondary hospital	22	17	12	24	19	94	40	9	21	70	94	23	17	22	23	9
26	54		Female		Junior college		Co-chief superintendent nurse	Other	Nursing Department	34	6000～8999	0	Employed	Married	1	No	Secondary hospital	22	13	8	30	23	96	15	6	14	35	113	32	23	22	24	12
27	50		Female		Junior college		Co-chief superintendent nurse	No	Transmission and Prevention Section	29	6000～8999	0	Employed	Married	1	No	Secondary hospital	21	16	9	33	23	102	24	10	10	44	113	31	25	21	24	12
28	45		Female		Undergraduate		Co-chief superintendent nurse	Head nurse	Pediatrics	23	3000～5999	2	Employed	Married	1	No	Secondary hospital	19	20	3	38	18	98	39	30	8	77	122	29	30	26	26	11
29	42		Female		Undergraduate		Supervisor nurse	No	obstetrics	20	6000～8999	0	Employed	Married	2	No	Secondary hospital	20	17	8	29	29	103	38	14	31	83	87	23	21	17	16	10
30	49		Female		Undergraduate		Co-chief superintendent nurse	Head nurse	Rehabilitation Medicine	29	9000～11999	0	Employed	Married	1	No	Tertiary hospitals	7	13	5	24	9	58	9	15	8	32	150	45	30	30	30	15
31	42		Female		Undergraduate		Supervisor nurse	No	Operating room	23	6000～8999	2	Employed	Married	1	Yes	Tertiary hospitals	20	20	6	29	24	99	37	13	13	63	130	36	26	25	29	14
32	45		Female		Undergraduate		Supervisor nurse	Head nurse	General Surgery	26	3000～5999	2	Employed	Married	1	No	Secondary hospital	19	18	12	32	23	104	42	8	21	71	96	25	23	16	21	11
33	54		Female		Undergraduate		Co-chief superintendent nurse	Head nurse	Outpatient Obstetrics	32	6000～8999	0	Employed	Married	1	Yes	Tertiary hospitals	19	17	9	29	22	96	36	6	12	54	115	35	24	23	22	11
34	40		Female		Undergraduate		Supervisor nurse	Head nurse	Nephrology	17	6000～8999	0	Employed	Divorced	1	No	Tertiary hospitals	16	20	6	24	24	90	29	8	19	56	124	36	28	19	27	14
35	45		Female		Junior college		Supervisor nurse	Other	Radiology	25	6000～8999	0	Employed	Married	2	No	Secondary hospital	16	14	8	22	18	78	11	5	30	46	104	31	22	21	20	10
36	44		Female		Undergraduate		Senior nurse	No	spine	28	6000～8999	0	Contract	Divorced	1	No	Tertiary hospitals	16	16	7	32	23	94	26	6	11	43	125	38	25	23	25	14
37	40		Female		Undergraduate		Supervisor nurse	Head nurse	Gastroenterology	21	9000～11999	0	Employed	Married	1	No	Tertiary hospitals	13	14	6	28	20	81	33	9	18	60	105	27	22	20	24	12
38	45		Female		Undergraduate		Supervisor nurse	No	surgical	25	3000～5999	2	Employed	Married	1	No	Secondary hospital	24	20	12	36	29	121	32	11	29	72	76	19	17	16	16	8
39	54		Female		Junior college		Co-chief superintendent nurse	No	Operating room	31	9000～11999	0	Employed	Married	1	Yes	Tertiary hospitals	16	20	9	29	22	96	29	6	12	47	128	38	26	23	28	13
40	53		Female		Technical secondary school		Supervisor nurse	No	Infectious Diseases	32	6000～8999	0	Employed	Married	1	Yes	Secondary hospital	22	18	7	30	23	100	17	6	15	38	117	36	24	22	24	11
41	45		Female		Undergraduate		Co-chief superintendent nurse	Responsible group leader/Deputy Head Nurse	obstetrics	22	9000～11999	0	Employed	Married	1	Yes	Tertiary hospitals	21	16	7	34	23	101	21	10	13	44	113	35	24	19	24	11
42	43		Female		Undergraduate		Co-chief superintendent nurse	Head nurse	Critical Care Medicine	23	6000～8999	2	Employed	Married	2	Yes	Secondary hospital	16	15	7	33	22	93	29	10	22	61	104	27	24	20	23	10
43	47		Female		Junior college		Supervisor nurse	No	Operating room	25	9000～11999	0	Employed	Married	1	Yes	Tertiary hospitals	26	18	8	31	24	107	29	11	22	62	110	30	25	22	23	10
44	54		Female		Junior college		Co-chief superintendent nurse	Head nurse	Oncology	34	over 12000	0	Employed	Married	1	Yes	Tertiary hospitals	19	18	7	26	16	86	30	9	14	53	108	29	25	18	24	12
45	40		Female		Junior college		Nurse	Other	Traumatology	17	3000～5999	3	Contract	Unmarried	0	Yes	Secondary hospital	25	17	8	34	23	107	34	10	23	67	115	32	23	24	24	12
46	42		Female		Undergraduate		Supervisor nurse	No	Internal Medicine	21	9000～11999	0	Employed	Married	1	No	Tertiary hospitals	23	20	7	38	32	120	39	16	19	74	121	30	26	23	27	15
47	49		Female		Undergraduate		Co-chief superintendent nurse	No	Pediatrics	27	9000～11999	0	Employed	Married	1	Yes	Tertiary hospitals	28	20	10	37	32	127	43	10	28	81	97	18	27	22	21	9
48	54		Female		Junior college		Co-chief superintendent nurse	No	Endocrinology	35	9000～11999	0	Employed	Married	1	No	Tertiary hospitals	12	14	6	32	26	90	21	8	9	38	118	36	24	22	24	12
49	48		Female		Junior college		Supervisor nurse	No	obstetrics	27	6000～8999	0	Employed	Married	1	No	Secondary hospital	19	14	8	29	22	92	18	10	8	36	123	36	27	24	25	11
50	42		Female		Junior college		Senior nurse	No	Nephrology	22	6000～8999	0	Employed	Divorced	1	No	Tertiary hospitals	14	19	7	27	18	85	26	15	37	78	89	16	23	15	21	14
51	42		Female		Undergraduate		Supervisor nurse	Other	Internal Medicine	22	3000～5999	0	Employed	Married	1	Yes	Secondary hospital	19	15	11	30	18	93	16	6	10	32	112	33	24	21	23	11
52	44		Female		Undergraduate		Co-chief superintendent nurse	No	Rehabilitation One	22	6000～8999	3	Employed	Married	1	No	Tertiary hospitals	20	20	10	30	21	101	35	13	27	75	107	27	26	22	21	11
53	43		Female		Undergraduate		Supervisor nurse	Head nurse	Internal Medicine	23	3000～5999	0	Employed	Married	2	No	Secondary hospital	11	9	9	18	11	58	11	5	8	24	150	45	30	30	30	15
54	53		Female		Technical secondary school		Supervisor nurse	No	Internal Medicine	35	6000～8999	0	Employed	Married	1	No	Secondary hospital	22	18	11	34	28	113	28	10	20	58	95	25	23	18	19	10
55	40		Female		Undergraduate		Supervisor nurse	Head nurse	Kidney	16	3000～5999	2	Employed	Married	1	No	Secondary hospital	16	14	6	31	21	88	37	19	24	80	117	34	25	22	24	12
56	40		Female		Undergraduate		Senior nurse	No	Cardiology	17	3000～5999	0	Contract	Married	2	No	Secondary hospital	27	19	11	41	27	125	24	5	18	47	146	44	30	27	30	15
57	56		Female		Undergraduate		Co-chief superintendent nurse	Responsible group leader/Deputy Head Nurse	Rehabilitation Department One Ward	34	6000～8999	0	Employed	Married	1	Yes	Tertiary hospitals	17	14	7	23	17	78	23	6	9	38	127	39	26	23	27	12
58	45		Female		Undergraduate		Co-chief superintendent nurse	No	Ward	23	6000～8999	0	Employed	Married	1	No	Tertiary hospitals	19	14	7	24	19	83	32	7	16	55	117	35	25	21	24	12
59	44		Female		Undergraduate		Co-chief superintendent nurse	No	Nephrology	27	6000～8999	0	Employed	Married	1	No	Tertiary hospitals	22	17	6	35	22	102	38	18	23	79	104	27	23	20	22	12
60	43		Female		Undergraduate		Co-chief superintendent nurse	No	Oncology	23	9000～11999	0	Employed	Married	1	Yes	Tertiary hospitals	13	19	3	22	14	71	25	5	8	38	142	45	26	27	29	15
61	45		Female		Undergraduate		Co-chief superintendent nurse	Head nurse	Blood Purification Center	30	9000～11999	0	Contract	Married	1	Yes	Secondary hospital	14	12	6	22	18	72	17	9	21	47	125	38	26	24	25	12
62	43		Female		Undergraduate		Supervisor nurse	No	Lose one night room	24	6000～8999	0	Contract	Married	2	No	Secondary hospital	17	15	9	29	21	91	23	9	21	53	93	32	17	17	18	9
63	49		Female		Undergraduate		Co-chief superintendent nurse	Head nurse	Critical Care Medicine	28	9000～11999	0	Employed	Married	1	Yes	Tertiary hospitals	13	15	4	33	33	98	41	10	26	77	106	27	28	17	22	12
64	45		Female		Undergraduate		Supervisor nurse	Head nurse	Nursing Department	25	6000～8999	1	Employed	Married	1	No	Secondary hospital	27	18	10	42	35	132	48	20	10	78	141	43	28	25	30	15
65	47		Female		Undergraduate		Co-chief superintendent nurse	Head nurse	Nursing Department	29	9000～11999	0	Employed	Married	1	No	Tertiary hospitals	14	14	6	24	19	77	28	5	15	48	106	31	23	19	22	11
66	44		Female		Undergraduate		Co-chief superintendent nurse	Deputy Director/Director of Nursing	Nursing Department	25	6000～8999	2	Employed	Married	1	No	Secondary hospital	22	18	11	33	27	111	44	18	19	81	113	30	26	20	24	13
67	52		Female		Undergraduate		Chief superintendent nurse	Deputy Director/Director of Nursing	Nursing Department	33	over 12000	0	Employed	Married	2	No	Tertiary hospitals	20	16	6	28	24	94	25	6	15	46	129	33	28	27	27	14
68	41		Female		Undergraduate		Senior nurse	Responsible group leader/Deputy Head Nurse	obstetrics	30	9000～11999	0	Contract	Married	2	No	Secondary hospital	28	20	12	44	34	138	9	11	14	34	107	30	21	20	25	11
69	40		Female		Undergraduate		Supervisor nurse	Responsible group leader/Deputy Head Nurse	Gynecology	20	9000～11999	0	Employed	Married	2	No	Tertiary hospitals	7	14	3	11	12	47	14	5	19	38	99	27	13	21	23	15
70	48		Female		Junior college		Supervisor nurse	Head nurse	cardiology	29	3000～5999	0	Employed	Married	1	Yes	Tertiary hospitals	24	17	10	36	27	114	38	17	22	77	91	27	19	18	18	9
71	47		Female		Junior college		Supervisor nurse	No	Renal Rheumatology	29	3000～5999	0	Employed	Married	1	Yes	Tertiary hospitals	24	19	6	30	21	100	27	8	24	59	113	31	24	23	23	12
72	46		Female		Undergraduate		Supervisor nurse	Head nurse	Supply Room	26	6000～8999	3	Employed	Divorced	1	No	Secondary hospital	19	19	7	37	24	106	37	13	27	77	90	27	18	16	19	10
73	40		Female		Undergraduate		Supervisor nurse	No	Gastroenterology	18	6000～8999	3	Contract	Married	2	Yes	Secondary hospital	20	15	6	29	22	92	27	6	34	67	105	33	25	18	20	9
74	44		Female		Undergraduate		Supervisor nurse	Head nurse	Emergency Department	23	3000～5999	2	Employed	Married	1	No	Secondary hospital	27	20	10	32	28	117	34	19	17	70	89	20	21	13	23	12
75	49		Female		Undergraduate		Chief superintendent nurse	Deputy Director/Director of Nursing	Nursing Department	31	6000～8999	0	Employed	Married	1	No	Tertiary hospitals	19	17	8	33	21	98	30	10	28	68	113	34	22	22	23	12
76	46		Female		Undergraduate		Co-chief superintendent nurse	Head nurse	Pediatrics	26	9000～11999	0	Employed	Married	1	No	Tertiary hospitals	15	15	7	29	21	87	22	13	22	57	134	39	27	28	28	12
77	40		Female		Junior college		Senior nurse	No	Thoracic Surgery	20	3000～5999	3	Contract	Married	2	Yes	Tertiary hospitals	12	16	8	36	25	97	22	16	10	48	145	43	29	30	29	14
78	54		Female		Technical secondary school		Supervisor nurse	Deputy Director/Director of Nursing	Hospital office	30	3000～5999	0	Employed	Married	1	No	Primary hospital	17	16	10	34	22	99	18	12	22	52	116	34	24	23	24	11
79	47		Female		Junior college		Supervisor nurse	Head nurse	Outpatient	27	9000～11999	0	Contract	Married	1	No	Secondary hospital	9	18	7	23	18	75	25	5	9	39	124	29	28	25	27	15
80	50		Female		Undergraduate		Co-chief superintendent nurse	Deputy Director/Director of Nursing	Nursing Department	30	6000～8999	0	Employed	Married	1	No	Secondary hospital	19	15	8	27	26	95	14	6	12	32	109	28	24	21	24	12
81	48		Female		Junior college		Supervisor nurse	Deputy Director/Director of Nursing	Nursing Department	24	6000～8999	0	Employed	Married	1	No	Secondary hospital	16	15	7	28	20	86	18	11	18	47	116	35	25	21	24	11
82	49		Female		Undergraduate		Nurse	No	obstetrics	26	6000～8999	3	Employed	Married	1	Yes	Tertiary hospitals	19	15	6	30	21	91	33	6	22	61	97	26	22	19	19	11
83	45		Female		Undergraduate		Co-chief superintendent nurse	Deputy Director/Director of Nursing	Nursing Department	24	6000～8999	1	Employed	Married	1	No	Secondary hospital	16	15	9	28	25	93	26	8	26	60	97	29	21	17	20	10
84	47		Female		Junior college		Senior nurse	Other	ICU	24	6000～8999	0	Employed	Married	1	Yes	Tertiary hospitals	13	10	6	26	18	73	15	5	33	53	131	40	29	21	27	14
85	48		Female		Undergraduate		Co-chief superintendent nurse	Deputy Director/Director of Nursing	Nursing Department	29	9000～11999	0	Employed	Married	2	Yes	Secondary hospital	16	13	8	31	21	89	31	11	27	69	107	34	23	18	21	11
86	42		Female		Undergraduate		Supervisor nurse	Head nurse	Gynecology	19	6000～8999	0	Employed	Married	1	No	Secondary hospital	19	20	10	38	26	113	27	6	17	50	129	39	27	21	27	15
87	55		Female		Junior college		Co-chief superintendent nurse	No	obstetrics	34	9000～11999	0	Employed	Divorced	1	No	Tertiary hospitals	18	15	6	24	21	84	11	8	10	29	118	36	23	23	24	12
88	44		Female		Undergraduate		Supervisor nurse	Responsible group leader/Deputy Head Nurse	obstetrics	22	9000～11999	0	Employed	Married	1	Yes	Tertiary hospitals	17	18	5	30	18	88	35	8	14	57	98	25	26	14	21	12
89	54		Female		Technical secondary school		Senior nurse	No	Delivery room	32	6000～8999	0	Employed	Married	1	No	Tertiary hospitals	17	19	9	31	21	97	13	5	9	27	127	37	27	24	25	14
90	44		Female		Junior college		Supervisor nurse	Head nurse	Integrated Branch	22	6000～8999	0	Employed	Married	1	No	Primary hospital	19	15	7	31	24	96	44	12	19	75	99	22	25	18	24	10
91	49		Female		Junior college		Senior nurse	No	Emergency Department	29	3000～5999	0	Employed	Married	1	Yes	Tertiary hospitals	16	17	9	26	19	87	25	15	31	71	91	28	19	18	19	7
92	54		Female		Undergraduate		Chief superintendent nurse	Other	Patient return visit center	31	3000～5999	0	Employed	Married	1	No	Secondary hospital	27	20	12	34	27	120	50	5	13	68	96	16	20	20	28	12
93	43		Female		Undergraduate		Co-chief superintendent nurse	Head nurse	ICU	25	6000～8999	0	Employed	Divorced	1	Yes	Tertiary hospitals	19	18	6	32	22	97	39	6	24	69	91	31	19	14	19	8
94	43		Female		Undergraduate		Co-chief superintendent nurse	Deputy Director/Director of Nursing	Nursing Department	23	6000～8999	0	Employed	Married	1	No	Secondary hospital	18	13	7	32	23	93	14	6	9	29	137	37	30	27	28	15
95	40		Female		Undergraduate		Supervisor nurse	Head nurse	Pulmonary Diseases	18	3000～5999	2	Contract	Married	1	No	Secondary hospital	20	15	7	29	23	94	23	18	16	57	114	36	22	22	22	12
96	42		Female		Junior college		Senior nurse	No	neurosurgery	20	6000～8999	0	Employed	Married	1	Yes	Tertiary hospitals	19	17	7	27	25	95	26	10	9	45	109	31	22	21	23	12
97	55		Female		Junior college		Supervisor nurse	Head nurse	Internal Medicine	36	3000～5999	0	Contract	Married	1	No	Secondary hospital	19	14	12	38	24	107	29	15	8	52	94	25	22	22	18	7
98	54		Female		Junior college		Co-chief superintendent nurse	Responsible group leader/Deputy Head Nurse	Pediatrics	32	6000～8999	0	Employed	Married	1	No	Secondary hospital	19	12	6	27	18	82	19	6	12	37	126	37	25	24	27	13
99	45		Female		Undergraduate		Co-chief superintendent nurse	Responsible group leader/Deputy Head Nurse	Operating room	24	6000～8999	0	Employed	Married	1	Yes	Tertiary hospitals	15	15	7	29	19	85	32	8	23	63	112	31	24	22	23	12
100	46		Female		Undergraduate		Co-chief superintendent nurse	Head nurse	Obstetrics and Gynecology	25	6000～8999	0	Employed	Married	1	No	Secondary hospital	24	12	8	29	27	100	18	5	15	38	125	34	29	25	25	12
101	44		Female		Undergraduate		Supervisor nurse	Head nurse	Chinese Medicine Rehabilitation	24	6000～8999	2	Employed	Married	1	Yes	Secondary hospital	18	15	8	29	18	88	21	6	13	40	116	34	24	21	24	13
102	41		Female		Undergraduate		Supervisor nurse	No	Emergency Department	22	9000～11999	0	Contract	Married	1	Yes	Tertiary hospitals	16	13	8	28	18	83	26	11	27	64	120	36	24	24	24	12
103	49		Female		Undergraduate		Co-chief superintendent nurse	Deputy Director/Director of Nursing	Nursing Department and Orthopedics	29	6000～8999	2	Employed	Married	1	No	Secondary hospital	20	15	10	33	27	105	29	7	18	54	104	29	23	21	20	11
104	46		Female		Undergraduate		Co-chief superintendent nurse	Head nurse	orthopedics	28	6000～8999	0	Contract	Married	1	No	Secondary hospital	18	18	8	30	26	100	29	6	23	58	93	21	23	17	20	12
105	47		Female		Junior college		Supervisor nurse	Head nurse	Washing center	24	6000～8999	0	Employed	Married	1	No	Secondary hospital	14	11	11	28	21	85	19	6	24	49	118	36	27	17	24	14
106	45		Female		Undergraduate		Supervisor nurse	Head nurse	Physical examination	23	6000～8999	0	Employed	Married	1	No	Secondary hospital	21	15	8	31	21	96	16	5	28	49	97	29	20	19	20	9
107	40		Female		Undergraduate		Senior nurse	No	Renal Rheumatology	20	3000～5999	3	Contract	Married	2	No	Tertiary hospitals	22	12	6	26	18	84	32	7	29	68	99	25	20	19	22	13
108	48		Female		Undergraduate		Supervisor nurse	Head nurse	Outpatient and emergency	28	3000～5999	0	Contract	Married	1	No	Secondary hospital	24	15	9	32	26	106	19	9	13	41	125	37	29	22	25	12
109	48		Female		Junior college		Senior nurse	No	Infectious Diseases	22	3000～5999	0	Contract	Married	1	No	Secondary hospital	25	17	9	35	27	113	54	15	23	92	106	37	22	22	18	7
110	46		Female		Undergraduate		Co-chief superintendent nurse	No	obstetrics	23	6000～8999	0	Employed	Married	1	Yes	Tertiary hospitals	17	18	6	26	24	91	36	14	16	66	112	30	22	23	25	12
111	46		Female		Junior college		Supervisor nurse	Other	Hospital Sense	26	6000～8999	0	Employed	Married	1	No	Secondary hospital	19	16	9	31	23	98	28	7	22	57	97	27	21	18	20	11
112	40		Female		Undergraduate		Co-chief superintendent nurse	Deputy Director/Director of Nursing	Nursing Department	21	3000～5999	3	Employed	Married	1	No	Primary hospital	25	16	9	25	23	98	9	5	8	22	139	42	28	28	28	13
113	43		Female		Undergraduate		Senior nurse	No	Cardiology	23	6000～8999	0	Contract	Married	1	No	Secondary hospital	23	19	6	33	29	110	14	10	13	37	112	32	24	21	23	12
114	48		Female		Junior college		Supervisor nurse	No	Maternity	29	6000～8999	0	Employed	Married	1	Yes	Secondary hospital	21	15	7	32	22	97	20	7	33	60	111	30	24	23	23	11
115	40		Female		Undergraduate		Supervisor nurse	Other	Otolaryngology	17	3000～5999	0	Contract	Married	1	Yes	Tertiary hospitals	24	18	6	34	20	102	33	13	9	55	133	36	27	28	29	13
116	46		Female		Junior college		Supervisor nurse	No	Operating room	26	6000～8999	0	Employed	Married	1	Yes	Secondary hospital	26	20	12	40	36	134	18	10	40	68	97	28	21	19	19	10
117	40		Female		Undergraduate		Co-chief superintendent nurse	Deputy Director/Director of Nursing	Nursing Department	22	9000～11999	1	Employed	Married	1	No	Secondary hospital	19	15	7	27	27	95	35	8	12	55	122	33	28	25	24	12
118	43		Female		Undergraduate		Supervisor nurse	Head nurse	Blood draw room	24	3000～5999	0	Employed	Married	1	No	Secondary hospital	25	14	12	41	36	128	44	10	13	67	134	29	30	30	30	15
119	40		Female		Junior college		Nurse	Other	Nephrology	20	6000～8999	0	Contract	Unmarried	0	No	Tertiary hospitals	15	11	6	23	18	73	27	6	13	46	119	35	24	24	24	12
120	46		Female		Undergraduate		Supervisor nurse	Head nurse	Outpatient	25	6000～8999	1	Contract	Divorced	1	No	Secondary hospital	18	17	8	29	22	94	34	8	17	59	116	34	25	22	24	11
121	53		Female		Undergraduate		Co-chief superintendent nurse	Head nurse	Cardiology	34	9000～11999	0	Employed	Married	1	Yes	Tertiary hospitals	19	19	3	24	15	80	18	6	12	36	117	36	23	21	25	12
122	51		Female		Junior college		Supervisor nurse	No	Outpatient and emergency	30	3000～5999	3	Compile	Married	1	Yes	Secondary hospital	20	15	9	30	27	101	29	6	10	45	101	24	23	22	20	12
123	51		Female		Undergraduate		Co-chief superintendent nurse	Head nurse	Internal Medicine	30	9000～11999	0	Employed	Married	1	No	Tertiary hospitals	10	14	5	21	12	62	13	5	8	26	123	38	25	21	27	12
124	46		Female		Junior college		Co-chief superintendent nurse	Head nurse	Pediatrics	24	6000～8999	1	Employed	Married	1	No	Secondary hospital	23	19	9	35	27	113	29	11	20	60	84	15	21	17	21	10
125	40		Female		Junior college		Nurse	No	Pediatrics	17	3000～5999	0	Contract	Married	1	No	Secondary hospital	16	18	8	30	27	99	40	21	14	75	118	36	22	24	24	12
126	48		Female		Undergraduate		Supervisor nurse	No	Stomatology	28	6000～8999	0	Employed	Married	1	No	Secondary hospital	22	17	10	30	14	93	27	5	20	52	119	33	28	20	25	13
127	55		Female		Junior college		Co-chief superintendent nurse	Head nurse	Obstetrics and Gynecology	35	over 12000	0	Employed	Married	1	Yes	Tertiary hospitals	7	8	3	20	9	47	17	5	8	30	149	44	30	30	30	15
128	54		Female		Master		Chief superintendent nurse	Other	Nursing Department	36	over 12000	0	Employed	Married	1	No	Tertiary hospitals	21	16	9	25	18	89	21	5	11	37	126	38	25	24	26	13
129	48		Female		Undergraduate		Co-chief superintendent nurse	Head nurse	Internal Medicine	29	6000～8999	2	Employed	Married	1	No	Secondary hospital	17	15	8	31	25	96	22	7	21	50	107	27	23	22	23	12
130	45		Female		Undergraduate		Supervisor nurse	No	Outpatient	25	6000～8999	0	Contract	Married	1	Yes	Secondary hospital	18	14	6	31	20	89	15	10	21	46	106	33	21	18	22	12
131	42		Female		Undergraduate		Senior nurse	No	Department of Traditional Chinese Medicine	20	6000～8999	0	Employed	Divorced	1	No	Tertiary hospitals	15	12	6	24	19	76	26	5	19	50	103	29	21	22	21	10
132	51		Female		Junior college		Senior nurse	No	obstetrics	28	6000～8999	0	Contract	Married	1	Yes	Primary hospital	14	9	3	12	18	56	17	5	9	31	121	36	27	25	22	11
133	49		Female		Technical secondary school		Supervisor nurse	No	Operating room	29	3000～5999	1	Employed	Married	1	No	Secondary hospital	16	15	8	23	18	80	19	10	8	37	120	38	24	23	23	12
134	42		Female		Undergraduate		Supervisor nurse	No	Sterile supply room	23	6000～8999	0	Employed	Married	1	No	Secondary hospital	21	20	12	41	30	124	25	6	20	51	108	29	24	17	23	15
135	55		Female		Technical secondary school		Supervisor nurse	No	neurosurgery	33	9000～11999	0	Employed	Married	1	Yes	Tertiary hospitals	15	15	6	31	24	91	16	5	12	33	122	36	25	24	24	13
136	41		Female		Undergraduate		Supervisor nurse	No	obstetrics	20	6000～8999	3	Contract	Married	2	No	Tertiary hospitals	20	18	9	29	29	105	34	20	24	78	109	32	23	20	22	12
137	49		Female		Technical secondary school		Supervisor nurse	No	Operating room	29	3000～5999	0	Employed	Married	1	No	Secondary hospital	15	14	7	22	18	76	12	8	18	38	119	36	24	23	24	12
138	42		Female		Undergraduate		Senior nurse	No	Neurological Disease Clinical Diagnosis and Treatment Center	20	3000～5999	0	Contract	Married	1	No	Secondary hospital	19	19	4	41	23	106	23	5	10	38	145	43	30	28	29	15
139	40		Female		Technical secondary school		Senior nurse	No	Department of Traditional Chinese Medicine	20	6000～8999	0	Employed	Married	0	No	Tertiary hospitals	18	20	8	28	25	99	41	18	29	88	96	25	23	18	20	10
140	48		Female		Undergraduate		Co-chief superintendent nurse	Head nurse	cardiology	28	6000～8999	2	Employed	Married	1	Yes	Secondary hospital	19	15	8	29	24	95	29	10	12	51	122	31	29	20	28	14
141	54		Female		Junior college		Co-chief superintendent nurse	No	Critical Care Medicine	31	9000～11999	0	Employed	Married	1	Yes	Tertiary hospitals	21	16	7	30	25	99	15	12	11	38	129	36	28	23	27	15
142	45		Female		Undergraduate		Co-chief superintendent nurse	No	Department of Radiology	23	6000～8999	0	Employed	Married	1	No	Tertiary hospitals	10	5	3	34	12	64	10	10	8	28	150	45	30	30	30	15
143	41		Female		Undergraduate		Senior nurse	Responsible group leader/Deputy Head Nurse	Pediatrics	28	6000～8999	2	Contract	Married	1	Yes	Secondary hospital	22	17	9	39	28	115	45	12	21	78	102	26	22	23	22	9
144	45		Female		Undergraduate		Supervisor nurse	Responsible group leader/Deputy Head Nurse	Neuro Intensive Care Unit	24	3000～5999	0	Employed	Married	1	Yes	Tertiary hospitals	15	12	6	33	19	85	39	15	8	62	148	45	30	30	30	13
145	55		Female		Technical secondary school		Senior nurse	Other	Supply Room	40	6000～8999	0	Employed	Married	1	No	Secondary hospital	19	16	7	31	24	97	16	6	17	39	117	35	24	22	24	12
146	40		Female		Undergraduate		Senior nurse	No	Department of Traditional Chinese Medicine	18	3000～5999	0	Employed	Married	1	Yes	Secondary hospital	22	14	9	32	30	107	11	10	13	34	139	42	30	24	29	14
147	43		Female		Undergraduate		Co-chief superintendent nurse	No	surgical	23	6000～8999	0	Employed	Married	1	No	Tertiary hospitals	16	14	7	27	20	84	23	6	22	51	123	37	26	21	25	14
148	44		Female		Undergraduate		Co-chief superintendent nurse	No	Infectious Diseases	23	6000～8999	0	Employed	Married	1	No	Tertiary hospitals	16	19	11	34	23	103	35	7	28	70	94	21	22	20	21	10
149	51		Female		Technical secondary school		Nurse	No	Department of Orthopedic Burns and Plastic Surgery	28	6000～8999	0	Contract	Married	1	Yes	Secondary hospital	18	12	8	38	26	102	27	9	17	53	114	35	23	19	25	12
150	56		Female		Junior college		Co-chief superintendent nurse	Head nurse	Gynecology	39	6000～8999	0	Employed	Married	1	No	Tertiary hospitals	22	20	11	37	24	114	33	12	14	59	85	21	20	15	19	10
151	49		Female		Junior college		Nurse	No	Supply Room	25	3000～5999	0	Contract	Divorced	1	No	Secondary hospital	26	15	8	23	25	97	17	5	28	50	93	29	18	18	18	10
152	53		Female		Junior college		Supervisor nurse	No	Infectious Diseases	32	6000～8999	0	Employed	Married	1	No	Secondary hospital	19	15	7	29	15	85	16	10	10	36	121	32	26	23	27	13
153	55		Female		Technical secondary school		Senior nurse	No	Supply treasure	37	6000～8999	0	Employed	Married	1	No	Secondary hospital	18	15	9	33	28	103	14	5	25	44	126	38	26	24	25	13
154	47		Female		Undergraduate		Co-chief superintendent nurse	No	Department of Respiration	27	3000～5999	0	Employed	Married	1	Yes	Tertiary hospitals	14	12	6	28	20	80	17	5	17	39	108	32	23	18	23	12
155	48		Female		Junior college		Senior nurse	No	Infectious Diseases	27	3000～5999	0	Contract	Married	1	No	Secondary hospital	21	12	6	24	23	86	19	8	40	67	94	27	21	18	19	9
156	48		Female		Junior college		Senior nurse	Head nurse	Infectious Diseases	26	3000～5999	1	Contract	Married	1	Yes	Secondary hospital	22	20	9	37	31	119	36	13	22	71	118	39	23	20	24	12
157	46		Female		Undergraduate		Co-chief superintendent nurse	No	community Center	26	6000～8999	0	Employed	Married	1	No	Secondary hospital	16	15	8	31	21	91	19	8	25	52	113	27	24	24	25	13
158	42		Female		Undergraduate		Supervisor nurse	No	Operating room	23	3000～5999	3	Employed	Married	2	No	Secondary hospital	19	15	9	31	23	97	25	5	13	43	120	36	24	24	24	12
159	45		Female		Undergraduate		Supervisor nurse	Head nurse	Gynecology	25	3000～5999	0	Employed	Married	1	No	Tertiary hospitals	26	20	6	29	20	101	22	5	26	53	118	32	26	24	24	12
160	49		Female		Undergraduate		Supervisor nurse	No	Operating room	27	3000～5999	2	Employed	Married	1	Yes	Secondary hospital	19	11	6	24	21	81	11	5	9	25	118	36	24	22	24	12
161	45		Female		Undergraduate		Co-chief superintendent nurse	Head nurse	Otolaryngology	26	6000～8999	0	Employed	Married	2	No	Tertiary hospitals	14	16	9	24	15	78	29	7	19	55	122	32	27	22	29	12
162	56		Female		Technical secondary school		Supervisor nurse	No	Gynecology	31	3000～5999	2	Employed	Married	1	No	Primary hospital	21	17	8	33	23	102	26	7	16	49	106	26	25	19	25	11
163	41		Female		Junior college		Supervisor nurse	No	Operating room	19	3000～5999	0	Employed	Married	2	Yes	Secondary hospital	25	20	12	43	36	136	54	15	13	82	120	36	24	24	24	12
164	53		Female		Technical secondary school		Supervisor nurse	No	endocrine	36	6000～8999	0	Employed	Divorced	1	Yes	Tertiary hospitals	16	14	8	25	20	83	21	9	10	40	106	31	21	20	22	12
165	47		Female		Undergraduate		Supervisor nurse	No	Obstetrics and Gynecology	27	6000～8999	0	Employed	Married	1	No	Secondary hospital	20	16	7	34	28	105	23	18	34	75	98	23	21	19	22	13
166	42		Female		Undergraduate		Supervisor nurse	No	Hemodialysis Room	24	3000～5999	1	Contract	Married	1	Yes	Secondary hospital	21	17	6	31	22	97	26	8	13	47	118	36	25	22	22	13
167	45		Female		Junior college		Supervisor nurse	No	Neurology	25	6000～8999	0	Employed	Married	1	No	Tertiary hospitals	20	20	7	36	24	107	38	20	18	76	116	30	26	23	24	13
168	48		Female		Junior college		Supervisor nurse	No	Health Department	30	3000～5999	0	Employed	Married	1	Yes	Secondary hospital	19	19	11	25	26	100	29	7	15	51	110	29	22	23	24	12
169	44		Female		Junior college		Supervisor nurse	Other	Supply Room	24	3000～5999	0	Employed	Divorced	1	Yes	Secondary hospital	19	14	7	28	21	89	24	6	14	44	111	28	27	22	23	11
170	41		Female		Undergraduate		Supervisor nurse	Head nurse	Internal Medicine	19	6000～8999	0	Contract	Married	1	Yes	Secondary hospital	26	20	11	36	28	121	41	12	14	67	129	40	26	24	26	13
171	41		Female		Junior college		Nurse	No	surgical	19	3000～5999	3	Compile	Divorced	2	Yes	Tertiary hospitals	22	20	12	44	36	134	54	30	13	97	150	45	30	30	30	15
172	42		Female		Technical secondary school		Supervisor nurse	No	Obstetric Clinic	23	6000～8999	0	Contract	Married	1	Yes	Tertiary hospitals	28	19	11	33	26	117	30	10	13	53	110	29	24	22	23	12
173	49		Female		Junior college		Senior nurse	No	Outpatient	29	6000～8999	0	Employed	Married	1	No	Tertiary hospitals	15	11	6	22	20	74	9	10	13	32	120	36	24	24	24	12
174	56		Female		Undergraduate		Chief superintendent nurse	Deputy Director/Director of Nursing	Nursing Department	33	9000～11999	0	Employed	Married	1	No	Secondary hospital	18	13	8	26	18	83	18	9	18	45	112	31	24	23	22	12
175	45		Female		Undergraduate		Senior nurse	No	Department of Traditional Chinese Medicine	20	3000～5999	0	Employed	Married	1	Yes	Secondary hospital	17	15	6	29	19	86	11	5	17	33	120	36	24	24	24	12
176	42		Female		Undergraduate		Co-chief superintendent nurse	No	Operating room	22	6000～8999	1	Employed	Married	1	Yes	Tertiary hospitals	15	14	6	25	22	82	19	10	10	39	122	36	25	23	24	14
177	45		Female		Junior college		Co-chief superintendent nurse	Head nurse	surgical	23	3000～5999	2	Employed	Married	1	No	Tertiary hospitals	13	13	6	25	20	77	17	5	31	53	102	25	24	17	24	12
178	47		Female		Undergraduate		Senior nurse	No	Outpatient	28	3000～5999	3	Employed	Married	1	No	Secondary hospital	26	20	8	34	28	116	47	23	16	86	115	35	23	24	24	9
179	50		Female		Technical secondary school		Supervisor nurse	No	Operating room	25	3000～5999	0	Employed	Married	1	Yes	Secondary hospital	16	11	6	32	18	83	9	5	13	27	142	41	26	30	30	15
180	42		Female		Undergraduate		Supervisor nurse	Head nurse	Nursing Department	23	3000～5999	1	Employed	Married	1	No	Secondary hospital	16	15	6	28	19	84	33	5	15	53	127	38	28	23	25	13
181	47		Female		Technical secondary school		Supervisor nurse	No	Operating room	26	6000～8999	0	Employed	Married	1	No	Secondary hospital	24	14	8	31	17	94	15	11	8	34	118	36	24	23	23	12
182	45		Female		Junior college		Supervisor nurse	Head nurse	surgical	25	6000～8999	1	Employed	Married	1	No	Secondary hospital	21	20	8	35	28	112	43	6	22	71	84	14	19	18	20	13
183	48		Female		Undergraduate		Co-chief superintendent nurse	Deputy Director/Director of Nursing	Nursing Department	29	6000～8999	2	Employed	Divorced	1	No	Secondary hospital	17	11	6	32	22	88	28	13	25	66	121	37	24	24	24	12
184	40		Female		Undergraduate		Co-chief superintendent nurse	No	obstetrics	21	9000～11999	0	Contract	Married	2	Yes	Tertiary hospitals	18	19	11	27	17	92	36	9	23	68	98	24	24	20	20	10
185	50		Female		Technical secondary school		Supervisor nurse	No	Outpatient	30	6000～8999	0	Employed	Married	1	Yes	Secondary hospital	24	19	8	19	26	96	19	6	8	33	116	31	23	23	26	13
186	51		Female		Technical secondary school		Supervisor nurse	No	Renal Rheumatology	31	6000～8999	0	Employed	Married	1	Yes	Tertiary hospitals	21	15	6	30	23	95	32	10	21	63	99	30	20	18	20	11
187	54		Female		Junior college		Supervisor nurse	No	ICU	32	6000～8999	0	Employed	Married	1	No	Tertiary hospitals	13	10	5	33	23	84	20	8	18	46	108	31	24	18	23	12
188	47		Female		Undergraduate		Supervisor nurse	Deputy Director/Director of Nursing	Nursing Department	25	6000～8999	0	Employed	Married	1	No	Secondary hospital	16	16	8	33	24	97	17	6	11	34	116	34	24	23	24	11
189	42		Female		Undergraduate		Supervisor nurse	Deputy Director/Director of Nursing	Nursing Department	19	6000～8999	0	Employed	Married	1	No	Secondary hospital	19	16	8	30	23	96	30	9	17	56	117	35	24	23	24	11
190	48		Female		Undergraduate		Co-chief superintendent nurse	Other	PCCM Respiratory Ward	28	over 12000	0	Employed	Married	2	Yes	Tertiary hospitals	19	14	9	28	20	90	25	10	8	43	119	35	24	24	24	12
191	40		Female		Junior college		Supervisor nurse	No	obstetrics	20	6000～8999	0	Employed	Divorced	1	Yes	Tertiary hospitals	14	10	7	23	18	72	19	7	22	48	119	36	24	23	24	12
192	51		Female		Technical secondary school		Senior nurse	No	Department of Traditional Chinese Medicine	32	3000～5999	0	Employed	Married	1	No	Secondary hospital	19	14	9	20	21	83	18	12	9	39	110	25	26	26	22	11
193	45		Female		Undergraduate		Supervisor nurse	No	Obstetrics and Gynecology	23	6000～8999	0	Employed	Married	1	No	Secondary hospital	25	20	12	34	27	118	17	8	20	45	108	31	23	20	23	11
194	50		Female		Undergraduate		Supervisor nurse	No	Supply Room	25	6000～8999	0	Employed	Married	1	No	Secondary hospital	20	20	8	40	28	116	22	10	27	59	112	32	26	24	21	9
195	44		Female		Undergraduate		Supervisor nurse	Head nurse	Operating room	25	6000～8999	1	Employed	Married	1	No	Secondary hospital	12	9	3	21	17	62	11	5	8	24	149	44	30	30	30	15
196	47		Female		Undergraduate		Supervisor nurse	Head nurse	dermatology	20	6000～8999	0	Employed	Married	1	No	Secondary hospital	12	20	6	30	17	85	39	10	8	57	145	45	30	25	30	15
197	42		Female		Undergraduate		Supervisor nurse	No	Obstetric Clinic	22	6000～8999	0	Employed	Married	1	Yes	Tertiary hospitals	23	18	9	30	29	109	17	11	23	51	127	34	29	20	29	15
198	42		Female		Undergraduate		Supervisor nurse	No	radiation	22	3000～5999	1	Contract	Married	1	Yes	Tertiary hospitals	20	19	10	35	29	113	44	23	22	89	114	31	24	24	23	12
199	50		Female		Undergraduate		Co-chief superintendent nurse	Head nurse	Internal Medicine	30	6000～8999	0	Employed	Married	1	Yes	Secondary hospital	15	15	9	33	27	99	53	30	8	91	119	36	24	24	23	12
200	46		Female		Technical secondary school		Supervisor nurse	No	Operating room	25	3000～5999	0	Employed	Married	2	No	Secondary hospital	12	8	3	24	9	56	12	5	8	25	149	44	30	30	30	15
201	44		Female		Undergraduate		Co-chief superintendent nurse	Head nurse	Treatment of Diseases	24	9000～11999	1	Employed	Married	1	No	Secondary hospital	14	12	7	25	18	76	12	5	8	25	136	43	29	23	28	13
202	41		Female		Junior college		Supervisor nurse	No	Operating room 20	20	3000～5999	0	Employed	Married	2	Yes	Secondary hospital	26	18	12	43	31	130	52	13	8	73	121	37	24	24	24	12
203	46		Female		Undergraduate		Supervisor nurse	No	Cure disease	21	3000～5999	0	Employed	Married	1	No	Secondary hospital	22	14	8	26	19	89	31	15	9	55	115	35	24	22	22	12
204	40		Female		Junior college		Supervisor nurse	No	recovery unit	16	3000～5999	3	Contract	Married	2	No	Secondary hospital	22	15	8	25	18	88	30	9	33	72	99	26	23	18	21	11
205	40		Male		Undergraduate		Senior nurse	No	Pediatrics	20	3000～5999	3	Contract	Married	2	No	Secondary hospital	20	15	4	24	20	83	20	7	23	50	90	28	19	15	20	8
206	50		Female		Undergraduate		Nurse	No	orthopedics	20	3000～5999	3	Contract	Unmarried	0	No	Secondary hospital	15	7	3	11	9	45	9	5	48	62	31	9	7	6	6	3
207	41		Female		Undergraduate		Supervisor nurse	Head nurse	Nursing Department	20	6000～8999	1	Employed	Married	1	Yes	Secondary hospital	21	15	6	27	21	90	19	5	11	35	115	35	22	22	24	12
208	42		Female		Junior college		Nurse	No	Urology	22	3000～5999	3	Contract	Married	2	Yes	Secondary hospital	25	14	9	38	33	119	54	20	18	92	66	13	18	6	18	11
209	40		Female		Undergraduate		Senior nurse	No	Cardiology	19	3000～5999	3	Contract	Married	2	No	Secondary hospital	18	12	6	26	19	81	36	15	18	69	104	30	18	20	24	12
210	43		Female		Junior college		Co-chief superintendent nurse	Head nurse	Gynecology	23	6000～8999	0	Employed	Married	2	No	Secondary hospital	19	14	7	26	22	88	32	11	19	62	106	33	22	20	23	8
211	54		Female		Technical secondary school		Supervisor nurse	No	Outpatient	33	6000～8999	0	Employed	Married	1	Yes	Secondary hospital	21	11	5	16	20	73	22	5	13	40	112	35	19	26	22	10
212	44		Female		Undergraduate		Supervisor nurse	Head nurse	Pediatrics	24	6000～8999	0	Employed	Married	2	No	Secondary hospital	13	7	7	25	19	71	12	6	8	26	140	44	28	26	28	14
213	40		Female		Undergraduate		Senior nurse	No	surgical	18	3000～5999	3	Contract	Married	1	No	Secondary hospital	21	20	12	38	36	127	54	25	8	87	67	20	15	13	15	4
214	54		Female		Junior college		Co-chief superintendent nurse	Other	Nursing Department	31	6000～8999	0	Employed	Married	1	No	Secondary hospital	21	15	9	30	23	98	18	8	17	43	108	30	23	21	23	11
215	41		Female		Junior college		Senior nurse	No	Neurological Disease Clinical Diagnosis and Treatment Center	20	3000～5999	0	Contract	Married	1	No	Secondary hospital	15	10	6	28	19	78	13	5	26	44	115	32	25	16	28	14
216	45		Female		Undergraduate		Supervisor nurse	Deputy Director/Director of Nursing	Nursing Department	25	6000～8999	2	Contract	Married	1	No	Secondary hospital	18	19	5	40	23	105	16	10	9	35	150	45	30	30	30	15
217	40		Female		Undergraduate		Senior nurse	No	Anorectal	18	3000～5999	3	Contract	Married	0	No	Secondary hospital	16	17	9	32	15	89	34	15	28	77	97	25	21	16	23	12
218	45		Female		Undergraduate		Co-chief superintendent nurse	Deputy Director/Director of Nursing	Nursing Department	25	6000～8999	2	Employed	Married	1	No	Secondary hospital	21	15	8	32	27	103	20	8	25	53	100	25	23	18	23	11
219	50		Female		Technical secondary school		Senior nurse	No	Supply Room	30	3000～5999	0	Employed	Unmarried	1	Yes	Secondary hospital	28	20	12	39	35	134	53	30	8	91	140	39	30	26	30	15
220	40		Female		Undergraduate		Nurse	No	Treatment Center	19	3000～5999	0	Employed	Married	1	No	Secondary hospital	20	15	7	29	15	86	30	12	12	54	107	29	22	21	23	12
221	45		Female		Junior college		Senior nurse	Head nurse	Operating room	23	6000～8999	0	Contract	Married	1	Yes	Secondary hospital	16	15	7	24	25	87	22	12	41	75	93	29	18	17	19	10
222	40		Female		Undergraduate		Supervisor nurse	No	Respiratory Medicine	55	6000～8999	0	Contract	Married	1	Yes	Secondary hospital	12	9	7	26	16	70	9	5	11	25	116	33	24	23	24	12
223	42		Female		Undergraduate		Nurse	No	endocrine	20	6000～8999	0	Employed	Married	1	Yes	Tertiary hospitals	18	16	11	41	24	110	45	14	20	79	117	37	25	20	24	11
224	43		Female		Undergraduate		Supervisor nurse	No	Critical Care Medicine	22	6000～8999	0	Employed	Married	1	No	Secondary hospital	10	11	3	27	18	69	17	7	9	33	116	35	24	22	23	12
225	47		Female		Undergraduate		Co-chief superintendent nurse	Head nurse	neuroendocrine	29	6000～8999	0	Employed	Married	1	No	Secondary hospital	18	14	7	24	19	82	14	7	8	29	117	34	24	23	24	12
226	41		Female		Undergraduate		Supervisor nurse	No	Nephrology	18	6000～8999	1	Employed	Married	2	Yes	Tertiary hospitals	18	13	7	23	22	83	20	5	15	40	99	23	23	20	22	11
227	54		Female		Technical secondary school		Nurse	No	surgical	32	3000～5999	0	Employed	Married	1	No	Secondary hospital	16	7	3	19	13	58	17	9	28	54	120	36	24	24	24	12
228	60		Female		Undergraduate		Chief superintendent nurse	Other	Clinical Nursing Teaching Department	38	9000～11999	0	Employed	Married	1	No	Tertiary hospitals	21	15	7	27	27	97	27	10	25	62	113	31	24	22	24	12
229	40		Female		Undergraduate		Senior nurse	No	Pediatrics	18	3000～5999	3	Contract	Divorced	1	No	Secondary hospital	23	13	8	37	26	107	32	10	18	60	139	42	26	28	29	14
230	42		Male		Junior college		Nurse	No	Operating room	20	3000～5999	3	Contract	Married	0	No	Secondary hospital	17	13	7	30	20	87	20	5	24	49	116	34	23	24	24	11
231	49		Female		Undergraduate		Co-chief superintendent nurse	Other	Outpatient department	29	6000～8999	0	Employed	Divorced	1	No	Secondary hospital	26	17	9	31	23	106	17	7	23	47	113	32	25	24	24	8
232	48		Female		Junior college		Supervisor nurse	No	obstetrics	26	6000～8999	0	Contract	Divorced	1	No	Tertiary hospitals	22	15	9	32	22	100	13	10	9	32	100	27	20	20	23	10
233	50		Female		Junior college		Senior nurse	No	Special Ward	30	3000～5999	3	Employed	Married	1	No	Secondary hospital	20	12	7	26	22	87	25	9	17	51	126	37	26	25	25	13
234	43		Female		Junior college		Supervisor nurse	Head nurse	orthopedics	20	6000～8999	0	Contract	Married	2	No	Secondary hospital	16	19	6	20	15	76	18	7	12	37	135	41	28	25	27	14
235	43		Female		Undergraduate		Supervisor nurse	Head nurse	Pediatrics	23	6000～8999	1	Contract	Divorced	1	No	Tertiary hospitals	19	17	3	29	12	80	13	10	14	37	150	45	30	30	30	15
236	40		Female		Technical secondary school		Nurse	No	surgical	20	3000～5999	3	Compile	Unmarried	0	No	Secondary hospital	18	17	4	22	17	78	33	13	10	56	111	33	22	19	25	12
237	50		Female		Undergraduate		Co-chief superintendent nurse	Deputy Director/Director of Nursing	Nursing Department	30	6000～8999	1	Employed	Married	1	No	Secondary hospital	17	15	9	27	19	87	16	5	15	36	115	33	24	23	24	11
238	42		Female		Junior college		Senior nurse	No	orthopedics	20	6000～8999	0	Employed	Married	2	No	Secondary hospital	7	11	7	30	20	75	18	11	17	46	120	36	24	24	24	12
239	49		Female		Junior college		Co-chief superintendent nurse	No	Otolaryngology	30	6000～8999	0	Employed	Married	1	No	Secondary hospital	18	15	8	24	21	86	19	9	17	45	105	28	23	19	23	12
240	50		Female		Junior college		Supervisor nurse	No	Internal Medicine	32	3000～5999	0	Employed	Married	1	No	Secondary hospital	23	16	10	30	28	107	15	9	40	64	143	44	28	28	28	15
241	40		Female		Junior college		Senior nurse	No	Department of Encephalopathy and Cardiology	20	6000～8999	0	Contract	Married	1	No	Secondary hospital	25	18	11	35	30	119	33	19	28	80	140	43	29	29	26	13
242	40		Female		Junior college		Supervisor nurse	No	Supply Room	17	3000～5999	0	Contract	Married	0	No	Secondary hospital	28	19	11	30	19	107	16	7	25	48	94	24	22	16	23	9
243	54		Female		Technical secondary school		Nurse	No	Supply Room	38	3000～5999	0	Employed	Married	1	No	Secondary hospital	21	14	9	28	19	91	27	5	23	55	114	32	24	22	24	12
244	45		Female		Junior college		Supervisor nurse	No	Cardiology	25	6000～8999	0	Employed	Married	1	Yes	Secondary hospital	19	17	11	32	22	101	11	6	8	25	120	35	25	24	24	12
245	54		Female		Junior college		Co-chief superintendent nurse	Other	Nursing Department	33	9000～11999	0	Employed	Married	1	No	Tertiary hospitals	14	14	4	32	30	94	17	5	22	44	116	31	23	20	28	14
246	40		Female		Undergraduate		Supervisor nurse	No	Emergency Department	18	3000～5999	3	Employed	Married	1	No	Secondary hospital	22	15	8	33	24	102	32	10	25	67	110	31	22	22	23	12
247	49		Female		Undergraduate		Co-chief superintendent nurse	Head nurse	Operating room	28	6000～8999	2	Employed	Married	2	No	Secondary hospital	18	13	8	27	22	88	19	6	13	38	117	36	23	22	24	12
248	40		Female		Undergraduate		Co-chief superintendent nurse	Head nurse	surgical	20	6000～8999	0	Employed	Married	2	No	Secondary hospital	27	20	8	42	36	133	54	30	8	92	150	45	30	30	30	15
249	47		Female		Technical secondary school		Senior nurse	Head nurse	Administrative Office	29	6000～8999	0	Employed	Married	1	Yes	Primary hospital	28	20	12	44	36	140	54	30	8	92	150	45	30	30	30	15
250	47		Female		Junior college		Supervisor nurse	Head nurse	obstetrics	26	6000～8999	1	Employed	Married	1	Yes	Tertiary hospitals	21	19	7	27	20	94	17	7	14	38	135	38	29	27	27	14
251	46		Female		Junior college		Nurse	No	Recovery	30	3000～5999	3	Contract	Married	1	No	Secondary hospital	28	20	12	41	36	137	54	30	8	92	150	45	30	30	30	15
252	47		Female		Technical secondary school		Nurse	No	recovery unit	25	3000～5999	0	Contract	Married	1	No	Secondary hospital	24	19	12	41	32	128	54	30	8	92	150	45	30	30	30	15
253	40		Female		Junior college		Senior nurse	Responsible group leader/Deputy Head Nurse	Respiratory	17	3000～5999	3	Contract	Married	2	No	Secondary hospital	21	20	5	40	32	118	37	8	15	60	106	33	19	19	23	12
254	40		Male		Undergraduate		Senior nurse	No	recovery unit	16	3000～5999	3	Compile	Married	2	No	Secondary hospital	23	20	12	38	27	120	44	25	17	86	119	35	24	24	24	12
255	45		Female		Undergraduate		Co-chief superintendent nurse	Head nurse	neurosurgery	24	9000～11999	2	Employed	Married	1	No	Tertiary hospitals	16	15	7	27	19	84	18	8	9	35	120	32	27	23	26	12
256	49		Female		Junior college		Co-chief superintendent nurse	No	obstetrics	28	9000～11999	0	Employed	Married	1	Yes	Secondary hospital	23	19	9	36	30	117	19	6	11	36	110	30	25	22	22	11
257	40		Female		Undergraduate		Senior nurse	Other	recovery unit	20	3000～5999	3	Employed	Married	2	No	Secondary hospital	7	13	6	23	13	62	27	17	34	78	30	9	6	6	6	3
258	40		Female		Undergraduate		Senior nurse	No	Emergency	20	3000～5999	0	Contract	Married	2	No	Secondary hospital	27	19	10	36	22	114	28	8	18	54	119	34	26	24	23	12
259	48		Female		Undergraduate		Co-chief superintendent nurse	No	Respiratory	28	6000～8999	0	Employed	Divorced	1	Yes	Tertiary hospitals	22	17	11	33	28	111	12	6	8	26	120	36	24	24	24	12
260	49		Female		Undergraduate		Supervisor nurse	No	Nursing Department	30	3000～5999	1	Contract	Married	1	No	Secondary hospital	25	15	9	27	19	95	17	6	21	44	113	32	25	21	24	11
261	40		Female		Undergraduate		Supervisor nurse	No	Anorectal	16	3000～5999	3	Contract	Married	2	No	Secondary hospital	24	19	12	38	34	127	38	23	30	91	38	11	7	11	6	3
262	40		Female		Undergraduate		Senior nurse	Responsible group leader/Deputy Head Nurse	Obstetrics and Gynecology	21	6000～8999	1	Contract	Married	2	Yes	Secondary hospital	20	18	10	33	22	103	37	13	20	70	103	28	21	21	22	11
263	49		Female		Technical secondary school		Supervisor nurse	No	Outpatient	29	6000～8999	0	Employed	Married	1	No	Tertiary hospitals	24	18	12	28	22	104	28	12	33	73	102	26	22	20	23	11
264	46		Female		Junior college		Supervisor nurse	Head nurse	Gastroenterology	26	6000～8999	0	Employed	Married	1	No	Secondary hospital	21	14	6	29	23	93	31	10	23	64	110	31	24	21	24	10
265	40		Female		Undergraduate		Senior nurse	Other	surgical	16	3000～5999	3	Contract	Unmarried	0	No	Secondary hospital	28	20	12	44	35	139	40	14	16	70	107	31	22	24	20	10
266	53		Female		Junior college		Supervisor nurse	No	dermatology	53	6000～8999	0	Employed	Married	1	Yes	Tertiary hospitals	25	20	10	41	34	130	31	10	18	59	124	29	26	24	30	15
267	54		Female		Junior college		Co-chief superintendent nurse	No	Outpatient department	30	6000～8999	0	Employed	Married	1	Yes	Secondary hospital	11	10	6	24	18	69	20	5	19	44	126	36	25	25	27	13
268	41		Female		Undergraduate		Supervisor nurse	No	Pediatrics	20	3000～5999	0	Employed	Married	2	No	Secondary hospital	18	15	8	30	25	96	32	19	30	81	96	25	21	18	20	12
269	46		Female		Undergraduate		Co-chief superintendent nurse	Head nurse	obstetrics	26	6000～8999	0	Employed	Married	1	No	Secondary hospital	21	19	10	31	25	106	16	6	8	30	128	40	27	22	26	13
270	45		Female		Junior college		Co-chief superintendent nurse	No	obstetrics	26	6000～8999	0	Employed	Married	1	Yes	Secondary hospital	28	20	11	41	35	135	13	5	9	27	108	28	26	17	25	12
271	43		Female		Undergraduate		Supervisor nurse	No	obstetrics	21	3000～5999	0	Employed	Married	1	Yes	Secondary hospital	22	17	8	33	25	105	37	6	17	60	138	43	29	24	29	13
272	46		Female		Undergraduate		Co-chief superintendent nurse	No	obstetrics	22	3000～5999	0	Employed	Married	2	No	Secondary hospital	17	15	8	26	20	86	18	6	28	52	97	30	20	18	20	9
273	48		Female		Undergraduate		Co-chief superintendent nurse	Head nurse	Department of Respiratory and Critical Care Medicine	29	6000～8999	0	Employed	Married	1	No	Tertiary hospitals	24	19	12	32	22	109	23	7	18	48	126	38	28	20	27	13
274	40		Female		Undergraduate		Supervisor nurse	No	Endoscopy	20	3000～5999	0	Contract	Married	2	Yes	Secondary hospital	13	14	9	28	18	82	40	15	18	73	120	36	24	24	24	12
275	44		Female		Junior college		Supervisor nurse	No	Infectious Diseases	24	6000～8999	3	Employed	Divorced	1	No	Secondary hospital	19	15	9	30	20	93	22	12	12	46	110	37	23	16	23	11
276	42		Female		Undergraduate		Senior nurse	Head nurse	Emergency Department	21	3000～5999	0	Contract	Married	2	Yes	Tertiary hospitals	14	14	9	24	18	79	30	17	8	55	150	45	30	30	30	15
277	48		Female		Undergraduate		Co-chief superintendent nurse	Head nurse	Hemodialysis Room	28	6000～8999	0	Employed	Married	1	Yes	Secondary hospital	19	20	7	38	33	117	17	9	35	61	133	37	29	28	26	13
278	43		Female		Junior college		Supervisor nurse	No	Cardiology	20	6000～8999	0	Contract	Married	1	No	Tertiary hospitals	18	13	7	32	24	94	40	18	24	82	90	24	21	14	20	11
279	53		Female		Junior college		Co-chief superintendent nurse	No	Oncology	31	6000～8999	0	Employed	Married	1	Yes	Tertiary hospitals	22	18	7	36	31	114	42	10	14	66	106	27	23	21	24	11
280	50		Male		Phd		Chief superintendent nurse	Deputy Director/Director of Nursing	Cardiology	25	9000～11999	0	Employed	Married	2	Yes	Tertiary hospitals	24	17	9	36	27	113	49	26	15	90	120	36	24	24	24	12
281	40		Female		Junior college		Senior nurse	No	surgical	17	3000～5999	3	Compile	Married	1	No	Secondary hospital	23	14	7	26	22	92	36	5	21	62	102	26	22	21	24	9
282	40		Female		Junior college		Senior nurse	Responsible group leader/Deputy Head Nurse	Operating room	16	3000～5999	3	Employed	Married	1	No	Secondary hospital	23	14	8	31	19	95	20	11	13	44	66	20	14	12	14	6
283	49		Female		Technical secondary school		Supervisor nurse	No	Public Health Branch	28	3000～5999	0	Employed	Married	1	No	Primary hospital	7	5	3	14	9	38	20	6	28	54	122	25	26	26	30	15
284	43		Female		Undergraduate		Supervisor nurse	No	Outpatient	21	6000～8999	0	Contract	Married	1	Yes	Tertiary hospitals	16	15	6	22	13	72	13	5	17	35	127	38	25	23	28	13
285	46		Female		Undergraduate		Co-chief superintendent nurse	Head nurse	Nursing Department	28	9000～11999	0	Employed	Married	1	Yes	Tertiary hospitals	12	9	3	24	18	66	24	9	12	45	148	45	30	28	30	15
286	40		Female		Undergraduate		Senior nurse	Responsible group leader/Deputy Head Nurse	Internal Medicine	17	6000～8999	2	Contract	Married	2	No	Secondary hospital	21	16	8	42	29	116	49	26	20	95	100	28	21	22	20	9
287	45		Female		Undergraduate		Supervisor nurse	Head nurse	Intervention	22	3000～5999	1	Contract	Married	2	No	Tertiary hospitals	17	13	6	31	23	90	22	6	13	41	118	35	26	22	23	12
288	45		Female		Junior college		Co-chief superintendent nurse	Head nurse	Cardiology	25	6000～8999	0	Employed	Married	1	No	Tertiary hospitals	19	17	3	20	21	80	12	6	17	35	114	26	25	26	25	12
289	40		Female		Junior college		Senior nurse	No	Supply Room	18	3000～5999	0	Contract	Married	2	No	Secondary hospital	7	5	3	11	9	35	10	6	43	59	30	9	6	6	6	3
290	42		Female		Undergraduate		Supervisor nurse	Head nurse	Infectious Diseases	20	9000～11999	0	Contract	Married	1	No	Tertiary hospitals	10	8	7	22	9	56	14	13	20	47	134	38	28	27	27	14
291	53		Female		Junior college		Co-chief superintendent nurse	No	Gastroenterology	32	9000～11999	0	Employed	Married	1	Yes	Secondary hospital	24	20	8	27	20	99	27	9	27	63	101	26	25	16	23	11
292	50		Female		Junior college		Nurse	Other	Emergency Department	25	3000～5999	1	Employed	Married	2	No	Secondary hospital	20	12	7	28	24	91	19	10	36	65	91	29	18	17	18	9
293	41		Female		Junior college		Co-chief superintendent nurse	Head nurse	Gynecology	21	6000～8999	1	Employed	Divorced	1	Yes	Tertiary hospitals	10	18	4	25	15	72	13	6	8	27	117	37	24	20	24	12
294	42		Female		Undergraduate		Co-chief superintendent nurse	Head nurse	Respiratory Medicine	21	3000～5999	0	Employed	Married	1	No	Tertiary hospitals	15	20	6	28	21	90	28	6	15	49	119	35	22	25	25	12
295	43		Female		Undergraduate		Supervisor nurse	No	Outside the brain	20	6000～8999	0	Employed	Married	1	No	Secondary hospital	20	17	10	36	26	109	16	6	10	32	134	41	27	25	28	13
296	44		Female		Junior college		Supervisor nurse	Head nurse	Emergency Department	24	3000～5999	0	Employed	Married	1	No	Secondary hospital	13	5	3	38	33	92	49	30	8	87	150	45	30	30	30	15
297	40		Female		Undergraduate		Supervisor nurse	Head nurse	Hepatobiliary Surgery	20	3000～5999	0	Employed	Married	1	No	Tertiary hospitals	24	19	9	31	21	104	12	6	12	30	108	27	24	24	23	10
298	45		Female		Junior college		Supervisor nurse	No	Pediatrics	26	3000～5999	0	Employed	Married	1	No	Secondary hospital	10	8	6	29	12	65	13	5	17	35	133	44	29	20	25	15
299	40		Female		Junior college		Senior nurse	No	Internal Medicine	20	3000～5999	3	Contract	Married	2	No	Secondary hospital	27	20	11	35	31	124	44	12	30	86	103	28	20	23	22	10
300	48		Female		Junior college		Co-chief superintendent nurse	Head nurse	Emergency	24	6000～8999	0	Employed	Married	1	Yes	Secondary hospital	21	19	11	30	22	103	29	9	18	56	117	36	23	22	24	12
301	41		Female		Undergraduate		Senior nurse	Head nurse	Endocrinology	21	3000～5999	1	Employed	Married	2	Yes	Tertiary hospitals	16	15	5	26	14	76	14	10	8	32	130	38	23	24	30	15
302	40		Female		Undergraduate		Supervisor nurse	No	Pediatrics	18	3000～5999	0	Employed	Married	2	No	Secondary hospital	28	20	12	36	25	121	37	20	24	81	120	36	24	24	24	12
303	40		Female		Junior college		Senior nurse	No	Gynecology	19	3000～5999	3	Contract	Unmarried	0	Yes	Secondary hospital	19	20	7	31	26	103	41	20	23	84	94	27	19	19	19	10
304	50		Female		Junior college		Senior nurse	No	Outpatient Medical Guidance	26	3000～5999	0	Employed	Married	1	No	Secondary hospital	28	20	9	31	35	123	48	10	15	73	104	22	24	26	22	10
305	40		Female		Undergraduate		Supervisor nurse	No	Gastroenterology	17	6000～8999	3	Contract	Married	1	Yes	Secondary hospital	27	18	9	35	33	122	40	24	18	82	92	26	21	18	17	10
306	51		Female		Junior college		Supervisor nurse	No	Emergency Department	29	3000～5999	0	Employed	Married	1	No	Secondary hospital	21	15	8	28	23	95	27	5	10	42	102	27	23	20	23	9
307	55		Female		Undergraduate		Chief superintendent nurse	Head nurse	Endoscope	35	6000～8999	0	Employed	Married	1	Yes	Tertiary hospitals	20	17	6	29	22	94	16	7	16	39	127	38	27	22	27	13
308	50		Female		Undergraduate		Senior nurse	No	Emergency Department	20	6000～8999	3	Contract	Married	2	No	Secondary hospital	25	17	10	33	29	114	30	9	19	58	111	27	24	24	24	12
309	51		Female		Junior college		Supervisor nurse	No	Outpatient	30	3000～5999	0	Employed	Married	1	No	Tertiary hospitals	24	17	12	35	24	112	42	16	29	87	90	25	18	19	19	9
310	48		Female		Junior college		Supervisor nurse	No	Outpatient	28	3000～5999	0	Employed	Married	1	Yes	Secondary hospital	17	14	8	24	20	83	43	14	26	83	96	29	20	19	19	9
311	53		Female		Junior college		Supervisor nurse	No	Emergency Department	32	6000～8999	0	Employed	Married	2	No	Tertiary hospitals	26	17	8	25	17	93	12	5	14	31	128	41	25	22	26	14
312	50		Female		Undergraduate		Senior nurse	Head nurse	General Surgery	20	3000～5999	3	Contract	Married	1	No	Secondary hospital	24	20	10	31	23	108	42	21	17	80	123	34	26	24	26	13
313	40		Female		Undergraduate		Senior nurse	No	orthopedics	17	3000～5999	0	Contract	Married	1	Yes	Secondary hospital	16	14	7	29	21	87	22	10	32	64	103	28	24	19	22	10
314	43		Female		Junior college		Senior nurse	No	Health Return Visit Office	20	3000～5999	3	Contract	Married	1	Yes	Tertiary hospitals	15	13	6	12	19	65	23	6	31	60	118	35	24	23	24	12
315	43		Female		Undergraduate		Supervisor nurse	No	Orthopedics	21	6000～8999	0	Employed	Married	1	Yes	Secondary hospital	14	11	7	26	17	75	19	7	34	60	103	31	22	19	22	9
316	40		Female		Junior college		Nurse	Other	Gynecology	20	3000～5999	3	Compile	Unmarried	0	Yes	Secondary hospital	21	14	12	37	23	107	40	10	35	85	70	14	13	18	20	5
317	45		Female		Undergraduate		Senior nurse	Other	Heart disease	25	3000～5999	3	Contract	Unmarried	0	No	Secondary hospital	26	16	9	32	22	105	36	20	24	80	91	28	18	18	18	9
318	43		Female		Undergraduate		Co-chief superintendent nurse	No	Comprehensive Medical Center	23	6000～8999	0	Employed	Married	1	No	Tertiary hospitals	10	6	3	19	13	51	18	6	8	32	144	44	28	27	30	15
319	40		Male		Junior college		Nurse	No	Operating room	18	3000～5999	3	Contract	Married	1	No	Secondary hospital	28	20	8	29	26	111	27	14	23	64	98	19	18	28	23	10
320	44		Female		Junior college		Nurse	No	Neuroendocrinology	25	6000～8999	0	Employed	Married	1	No	Secondary hospital	19	18	11	41	34	123	52	19	37	108	57	9	14	10	14	10
321	43		Female		Undergraduate		Supervisor nurse	No	recovery unit	22	3000～5999	0	Employed	Married	1	No	Secondary hospital	9	15	8	28	20	80	29	5	13	47	102	29	22	22	23	6
322	44		Female		Junior college		Co-chief superintendent nurse	No	Supply Room	25	3000～5999	0	Employed	Married	1	Yes	Tertiary hospitals	19	15	5	23	20	82	24	5	8	37	122	39	25	21	25	12
323	50		Female		Junior college		Nurse	Other	Neurology	26	3000～5999	0	Contract	Divorced	1	No	Secondary hospital	24	20	8	35	31	118	34	18	31	83	86	22	19	15	19	11
324	45		Female		Undergraduate		Nurse	No	Operating room	20	3000～5999	3	Employed	Married	2	Yes	Secondary hospital	17	14	9	25	19	84	22	17	15	54	120	36	24	24	24	12
325	42		Female		Undergraduate		Co-chief superintendent nurse	No	orthopedics	23	3000～5999	0	Employed	Married	1	Yes	Tertiary hospitals	19	15	7	31	21	93	20	5	8	33	150	45	30	30	30	15
326	49		Female		Junior college		Senior nurse	No	Breast Nail Surgery	27	3000～5999	0	Employed	Married	1	Yes	Tertiary hospitals	28	20	9	41	27	125	14	9	13	36	133	38	26	27	28	14
327	42		Female		Undergraduate		Senior nurse	No	Internal Medicine	20	3000～5999	0	Employed	Married	1	Yes	Secondary hospital	26	20	11	29	28	114	20	10	40	70	60	18	12	12	12	6
328	43		Female		Undergraduate		Co-chief superintendent nurse	No	Urology	22	6000～8999	0	Employed	Married	1	No	Tertiary hospitals	24	18	7	28	29	106	36	11	24	71	93	19	25	22	17	10
329	48		Female		Undergraduate		Supervisor nurse	No	Urology	28	3000～5999	0	Contract	Married	1	Yes	Tertiary hospitals	21	18	6	22	20	87	35	5	20	60	83	20	20	18	16	9
330	51		Female		Undergraduate		Co-chief superintendent nurse	Head nurse	Disinfection Supply Center	30	6000～8999	0	Employed	Married	1	Yes	Tertiary hospitals	10	11	5	27	20	73	17	6	14	37	121	36	24	24	25	12
331	43		Female		Undergraduate		Supervisor nurse	Deputy Dean/Dean	Court administration	25	over 12000	0	Employed	Married	1	No	Secondary hospital	22	15	9	30	27	103	37	18	17	72	122	32	27	25	24	14
332	46		Female		Undergraduate		Co-chief superintendent nurse	Head nurse	Intervention Center	27	9000～11999	0	Employed	Married	1	Yes	Tertiary hospitals	15	13	6	29	21	84	13	5	8	26	149	45	30	29	30	15
333	48		Female		Technical secondary school		Nurse	No	Gynecology	28	3000～5999	0	Employed	Divorced	2	Yes	Secondary hospital	22	20	12	44	36	134	50	30	8	88	150	45	30	30	30	15
334	52		Female		Junior college		Supervisor nurse	No	Cardiovascular Medicine Cardiac Catheterization Laboratory	32	6000～8999	2	Employed	Married	1	Yes	Tertiary hospitals	17	18	7	31	25	98	30	12	27	69	89	21	19	17	21	11
335	40		Female		Undergraduate		Supervisor nurse	Responsible group leader/Deputy Head Nurse	obstetrics	18	3000～5999	0	Employed	Married	2	Yes	Secondary hospital	7	18	9	33	15	82	49	30	8	87	144	42	29	28	30	15
336	55		Female		Technical secondary school		Senior nurse	Responsible group leader/Deputy Head Nurse	Pediatrics	28	3000～5999	0	Employed	Married	1	Yes	Secondary hospital	16	14	9	34	18	91	54	30	8	92	86	28	20	14	15	9
337	48		Female		Junior college		Supervisor nurse	No	Sterile supply room	28	6000～8999	3	Employed	Married	2	No	Secondary hospital	14	10	7	23	20	74	14	5	21	40	124	36	25	23	25	15
338	44		Female		Junior college		Supervisor nurse	No	Supply Room	22	3000～5999	0	Employed	Death of a spouse	2	Yes	Tertiary hospitals	16	12	6	25	19	78	20	7	39	66	100	29	24	19	18	10
339	45		Female		Undergraduate		Co-chief superintendent nurse	No	Nursing Department	25	6000～8999	0	Employed	Married	1	No	Tertiary hospitals	28	20	11	38	29	126	42	15	23	80	91	19	22	17	23	10
340	43		Female		Undergraduate		Co-chief superintendent nurse	Deputy Director/Director of Nursing	Nursing Department	23	9000～11999	1	Employed	Married	1	No	Tertiary hospitals	15	13	6	25	18	77	18	10	40	68	126	39	25	25	25	12
341	46		Female		Junior college		Supervisor nurse	No	surgical	25	6000～8999	0	Employed	Married	1	Yes	Tertiary hospitals	22	15	6	28	20	91	16	5	24	45	106	30	24	18	23	11
342	42		Female		Undergraduate		Supervisor nurse	No	Cardiology	25	6000～8999	0	Employed	Married	2	No	Tertiary hospitals	21	18	9	36	18	102	41	15	18	74	115	30	26	21	25	13
343	45		Female		Junior college		Supervisor nurse	No	Hemodialysis room	22	3000～5999	0	Employed	Married	1	Yes	Secondary hospital	23	18	7	34	26	108	21	8	31	60	101	30	21	19	20	11
344	47		Female		Undergraduate		Co-chief superintendent nurse	No	surgical	29	6000～8999	0	Employed	Divorced	1	Yes	Tertiary hospitals	23	20	8	35	25	111	43	12	18	73	105	23	23	22	26	11
345	55		Female		Junior college		Supervisor nurse	No	Detoxification Supply Center	35	3000～5999	0	Employed	Married	1	Yes	Primary hospital	11	7	3	40	9	70	11	5	8	24	150	45	30	30	30	15
346	50		Female		Junior college		Co-chief superintendent nurse	Head nurse	Cardiology, Neurology	29	6000～8999	1	Employed	Divorced	1	No	Secondary hospital	20	15	9	30	25	99	16	6	11	33	119	34	22	24	26	13
347	50		Female		Undergraduate		Supervisor nurse	Responsible group leader/Deputy Head Nurse	Pediatrics	28	3000～5999	0	Employed	Married	2	No	Secondary hospital	28	20	12	44	27	131	54	30	8	92	150	45	30	30	30	15
348	55		Female		Undergraduate		Co-chief superintendent nurse	Responsible group leader/Deputy Head Nurse	Intervention room	33	3000～5999	3	Employed	Divorced	1	Yes	Tertiary hospitals	23	16	8	32	25	104	22	5	12	39	113	39	19	21	24	10
349	40		Female		Undergraduate		Supervisor nurse	No	Clinical departments	20	3000～5999	3	Employed	Married	2	No	Tertiary hospitals	24	15	8	34	26	107	22	5	30	57	64	18	13	13	13	7
350	46		Female		Undergraduate		Supervisor nurse	Responsible group leader/Deputy Head Nurse	Supply Room	25	6000～8999	0	Employed	Married	1	No	Tertiary hospitals	19	10	9	27	25	90	28	6	21	55	130	37	30	23	26	14
351	41		Female		Undergraduate		Supervisor nurse	No	Operating room	21	6000～8999	0	Employed	Divorced	1	Yes	Tertiary hospitals	15	10	6	27	18	76	19	7	38	64	91	24	24	13	20	10
352	46		Female		Junior college		Supervisor nurse	No	Operating room	24	3000～5999	3	Employed	Married	1	Yes	Secondary hospital	19	14	8	32	26	99	43	9	10	62	114	34	25	21	22	12
353	40		Female		Undergraduate		Senior nurse	No	no	18	3000～5999	3	Contract	Married	1	No	Tertiary hospitals	28	20	12	43	26	129	46	14	17	77	72	16	16	14	19	7
354	42		Female		Undergraduate		Supervisor nurse	No	Anorectal	22	3000～5999	0	Employed	Married	1	No	Tertiary hospitals	10	7	6	15	11	49	15	5	17	37	146	41	30	30	30	15
355	40		Female		Undergraduate		Supervisor nurse	Head nurse	Neonatology	20	6000～8999	0	Employed	Married	1	Yes	Tertiary hospitals	21	20	6	35	22	104	38	8	23	69	102	25	24	20	22	11
356	41		Female		Phd		Chief superintendent nurse	Other	Clinical Nursing Teaching Management Division	20	over 12000	0	Employed	Married	1	No	Tertiary hospitals	10	8	6	20	24	68	20	8	31	59	135	42	25	27	27	14
357	50		Female		Undergraduate		Supervisor nurse	No	Department of Traditional Chinese Medicine	30	3000～5999	0	Employed	Married	1	Yes	Tertiary hospitals	28	20	9	41	36	134	34	10	8	52	131	34	26	26	30	15
358	40		Female		Undergraduate		Supervisor nurse	No	Internal Medicine	21	3000～5999	0	Employed	Married	1	No	Tertiary hospitals	20	15	9	29	19	92	20	5	8	33	137	38	30	26	29	14
359	40		Female		Undergraduate		Senior nurse	No	Department of Traditional Chinese Medicine	18	6000～8999	3	Contract	Married	2	No	Tertiary hospitals	16	12	6	22	15	71	18	12	34	64	136	40	28	27	29	12
360	50		Female		Undergraduate		Supervisor nurse	Head nurse	Gynecology	30	6000～8999	0	Employed	Divorced	1	No	Tertiary hospitals	16	14	5	23	14	72	15	6	16	37	140	44	30	22	29	15
361	45		Male		Junior college		Chief superintendent nurse	Deputy Director/Director of Nursing	Emergency	24	over 12000	0	Compile	Divorced	2	Yes	Tertiary hospitals	24	18	11	32	27	112	46	25	19	90	106	31	21	22	21	11
362	42		Female		Undergraduate		Supervisor nurse	Head nurse	Gastrointestinal Surgery	24	6000～8999	0	Employed	Married	1	Yes	Tertiary hospitals	22	18	8	25	19	92	23	5	16	44	108	32	22	20	22	12
363	48		Female		Undergraduate		Co-chief superintendent nurse	Head nurse	Internal Medicine	30	6000～8999	0	Employed	Married	1	Yes	Tertiary hospitals	17	16	6	26	26	91	40	5	14	59	114	34	24	20	24	12
364	53		Female		Undergraduate		Co-chief superintendent nurse	Head nurse	Cardiovascular Surgery	35	over 12000	0	Employed	Married	1	No	Tertiary hospitals	14	13	3	24	13	67	18	5	14	37	137	41	28	24	29	15
365	40		Female		Undergraduate		Supervisor nurse	No	Gastroenterology	19	6000～8999	1	Employed	Married	2	Yes	Tertiary hospitals	18	16	7	26	24	91	35	16	22	73	110	33	23	20	22	12
366	55		Female		Junior college		Co-chief superintendent nurse	Head nurse	Department of Radiology	34	9000～11999	0	Employed	Married	1	No	Tertiary hospitals	11	7	4	19	17	58	24	6	15	45	127	38	27	24	25	13
367	54		Female		Undergraduate		Co-chief superintendent nurse	Head nurse	Anorectal	33	9000～11999	0	Employed	Married	1	No	Tertiary hospitals	13	16	7	29	21	86	27	21	24	72	118	34	25	21	24	14
368	44		Female		Undergraduate		Co-chief superintendent nurse	Head nurse	Obstetrics and Gynecology	24	6000～8999	0	Employed	Married	1	No	Secondary hospital	15	15	7	29	20	86	34	6	25	65	88	24	20	14	20	10
369	53		Female		Junior college		Co-chief superintendent nurse	Head nurse	Endocrinology	35	6000～8999	0	Employed	Married	1	Yes	Tertiary hospitals	10	14	7	27	19	77	26	8	30	64	90	27	18	18	18	9
370	45		Female		Master		Co-chief superintendent nurse	Head nurse	General	27	over 12000	0	Employed	Married	1	Yes	Tertiary hospitals	14	15	5	22	18	74	25	10	14	49	119	36	24	23	24	12
371	45		Female		Junior college		Nurse	No	Oral cavity	21	3000～5999	0	Contract	Married	1	Yes	Primary hospital	21	15	9	33	27	105	37	21	24	82	99	30	20	20	19	10
372	50		Female		Junior college		Supervisor nurse	Head nurse	Pediatrics	30	6000～8999	0	Contract	Married	2	Yes	Secondary hospital	12	13	7	33	22	87	49	23	8	80	148	44	30	30	30	14
373	49		Female		Undergraduate		Co-chief superintendent nurse	Head nurse	Department of Neurology	29	9000～11999	0	Employed	Married	1	No	Tertiary hospitals	10	9	4	21	14	58	15	8	21	44	121	33	28	24	25	11
374	48		Female		Undergraduate		Co-chief superintendent nurse	Head nurse	Pediatrics	29	6000～8999	0	Employed	Married	1	No	Tertiary hospitals	14	19	8	31	19	91	33	9	27	69	126	33	27	24	28	14
375	42		Female		Junior college		Supervisor nurse	Responsible group leader/Deputy Head Nurse	Pediatrics	20	3000～5999	0	Contract	Married	2	No	Secondary hospital	23	18	11	42	34	128	38	20	23	81	115	35	23	24	22	11
376	43		Female		Undergraduate		Nurse	No	obstetrics	24	3000～5999	0	Employed	Married	1	Yes	Tertiary hospitals	19	20	8	42	35	124	32	11	14	57	116	35	22	20	28	11
377	41		Female		Undergraduate		Supervisor nurse	No	Cardiac Surgery	20	6000～8999	0	Employed	Married	1	Yes	Tertiary hospitals	20	15	7	27	21	90	19	5	10	34	106	31	22	20	22	11
378	42		Female		Junior college		Senior nurse	No	Department of Neurology-Ward	22	9000～11999	0	Employed	Married	1	No	Tertiary hospitals	9	10	3	16	9	47	14	5	19	38	148	44	30	29	30	15
379	45		Female		Junior college		Co-chief superintendent nurse	Head nurse	Cardiology	26	9000～11999	0	Employed	Married	1	No	Secondary hospital	19	20	7	39	24	109	42	8	22	72	91	24	21	17	19	10
380	42		Female		Undergraduate		Co-chief superintendent nurse	No	Neurology	23	6000～8999	0	Employed	Married	1	No	Tertiary hospitals	11	18	5	22	12	68	10	6	13	29	138	42	29	24	29	14
381	45		Female		Undergraduate		Supervisor nurse	Head nurse	Outpatient department	23	9000～11999	0	Employed	Married	1	No	Tertiary hospitals	10	12	6	29	14	71	20	5	8	33	122	34	25	21	28	14
382	47		Female		Technical secondary school		Nurse	No	Child five	22	3000～5999	0	Employed	Divorced	1	No	Tertiary hospitals	20	13	8	30	19	90	17	9	13	39	149	45	30	30	29	15
383	47		Female		Technical secondary school		Supervisor nurse	No	Gynecology	26	6000～8999	0	Employed	Married	1	Yes	Secondary hospital	13	17	9	38	15	92	14	10	8	32	142	45	26	26	30	15
384	53		Female		Junior college		Co-chief superintendent nurse	Head nurse	Orthopedics	31	6000～8999	0	Employed	Married	1	No	Tertiary hospitals	11	16	6	31	20	84	43	17	21	81	117	34	24	22	25	12
385	40		Female		Undergraduate		Senior nurse	Head nurse	Bone three	19	6000～8999	2	Employed	Married	1	No	Tertiary hospitals	7	5	3	30	12	57	22	13	8	43	150	45	30	30	30	15
386	40		Female		Undergraduate		Supervisor nurse	Head nurse	Operating room	18	6000～8999	1	Employed	Married	2	No	Secondary hospital	15	14	7	24	18	78	25	9	28	62	105	29	23	20	23	10
387	41		Female		Undergraduate		Supervisor nurse	No	Pediatric Surgery	20	6000～8999	0	Employed	Married	1	No	Tertiary hospitals	7	8	3	28	18	64	9	5	48	62	150	45	30	30	30	15
388	44		Female		Junior college		Supervisor nurse	Head nurse	Integrated Branch	26	3000～5999	0	Employed	Married	2	Yes	Tertiary hospitals	16	14	6	17	15	68	34	5	8	47	146	45	26	30	30	15
389	42		Female		Junior college		Senior nurse	Other	Children's Intensive Care Unit	20	6000～8999	0	Employed	Married	2	Yes	Tertiary hospitals	19	13	6	30	23	91	15	8	24	47	112	35	24	16	24	13
390	42		Female		Undergraduate		Supervisor nurse	No	Orthopedics	22	6000～8999	0	Employed	Married	1	No	Tertiary hospitals	16	10	6	26	17	75	12	6	20	38	113	38	23	18	22	12
391	51		Female		Junior college		Co-chief superintendent nurse	No	Neonatology	30	6000～8999	0	Employed	Married	1	Yes	Tertiary hospitals	18	14	6	31	24	93	37	20	24	81	96	28	20	20	19	9
392	40		Female		Junior college		Supervisor nurse	Head nurse	Operating room	21	3000～5999	3	Contract	Married	1	Yes	Primary hospital	19	17	10	32	29	107	39	9	20	68	104	32	21	18	24	9
393	46		Female		Undergraduate		Co-chief superintendent nurse	Head nurse	ophthalmology	28	6000～8999	0	Employed	Married	1	No	Tertiary hospitals	18	14	8	31	23	94	47	23	18	88	110	31	24	22	22	11
394	40		Female		Undergraduate		Supervisor nurse	Responsible group leader/Deputy Head Nurse	Critical Care Medicine	18	6000～8999	3	Employed	Divorced	0	No	Tertiary hospitals	20	20	8	37	32	117	49	16	31	96	59	16	18	10	10	5
395	40		Female		Undergraduate		Supervisor nurse	Head nurse	Pediatric Surgery	21	6000～8999	0	Employed	Married	1	No	Tertiary hospitals	19	20	9	33	28	109	32	10	17	59	116	31	26	21	24	14
396	40		Female		Undergraduate		Supervisor nurse	No	Neurology	19	3000～5999	0	Employed	Married	1	Yes	Tertiary hospitals	12	13	6	23	16	70	14	5	8	27	116	33	24	19	26	14
397	54		Female		Junior college		Supervisor nurse	No	Urology	36	6000～8999	0	Employed	Married	1	No	Tertiary hospitals	23	17	5	29	17	91	34	8	22	64	91	28	24	13	19	7
398	40		Female		Junior college		Senior nurse	No	Internal Medicine	19	3000～5999	0	Contract	Married	2	No	Tertiary hospitals	17	18	10	37	22	104	49	26	19	94	92	25	20	18	20	9
399	44		Female		Junior college		Supervisor nurse	No	obstetrics	24	6000～8999	0	Contract	Married	1	Yes	Tertiary hospitals	9	9	4	17	12	51	9	6	12	27	132	41	26	22	30	13
400	42		Female		Undergraduate		Supervisor nurse	Other	obstetrics	20	3000～5999	0	Employed	Married	1	Yes	Tertiary hospitals	16	18	7	27	25	93	45	25	16	86	120	36	24	24	24	12
401	55		Female		Junior college		Co-chief superintendent nurse	Responsible group leader/Deputy Head Nurse	Pediatrics	25	6000～8999	0	Contract	Married	2	No	Secondary hospital	28	20	12	44	36	140	54	30	8	92	150	45	30	30	30	15
402	43		Female		Junior college		Senior nurse	No	Neurology	25	3000～5999	0	Employed	Married	1	Yes	Secondary hospital	19	18	12	31	19	99	22	10	13	45	119	33	24	24	25	13
403	48		Female		Junior college		Co-chief superintendent nurse	Head nurse	Pediatrics	29	9000～11999	0	Employed	Divorced	1	No	Secondary hospital	21	20	12	32	21	106	25	9	13	47	125	35	26	22	27	15
404	40		Female		Undergraduate		Supervisor nurse	No	Gastroenterology	19	3000～5999	0	Employed	Married	1	No	Tertiary hospitals	17	14	6	32	18	87	20	6	16	42	119	35	26	23	26	9
405	48		Female		Undergraduate		Co-chief superintendent nurse	Head nurse	Medical center	29	6000～8999	0	Employed	Married	1	No	Secondary hospital	10	20	3	24	23	80	18	8	34	60	109	29	25	19	23	13
406	43		Female		Undergraduate		Co-chief superintendent nurse	Head nurse	Chinese Medicine	23	over 12000	0	Employed	Married	1	No	Tertiary hospitals	8	13	3	14	9	47	24	7	26	57	131	36	28	22	30	15
407	47		Female		Technical secondary school		Supervisor nurse	No	Department of Traditional Chinese Medicine	26	3000～5999	0	Employed	Married	1	No	Primary hospital	21	15	7	32	19	94	13	7	29	49	97	28	19	19	20	11
408	44		Female		Undergraduate		Supervisor nurse	No	Check-out Center	20	3000～5999	0	Employed	Married	1	Yes	Secondary hospital	22	20	9	38	27	116	37	9	31	77	112	37	24	20	20	11
409	44		Female		Undergraduate		Supervisor nurse	No	obstetrics	24	6000～8999	0	Employed	Married	1	No	Tertiary hospitals	17	14	5	22	18	76	32	7	14	53	116	32	24	24	24	12
410	55		Female		Junior college		Co-chief superintendent nurse	No	ophthalmology	32	6000～8999	0	Employed	Married	1	Yes	Tertiary hospitals	24	15	7	33	22	101	35	10	21	66	102	26	24	21	23	8
411	56		Female		Junior college		Supervisor nurse	Deputy Director/Director of Nursing	Nursing Department	37	6000～8999	0	Compile	Married	1	No	Secondary hospital	22	19	8	33	24	106	21	8	18	47	108	30	26	21	22	9
412	54		Female		Technical secondary school		Supervisor nurse	No	Neurology	35	3000～5999	0	Employed	Married	1	No	Tertiary hospitals	17	14	7	29	20	87	27	6	17	50	104	29	22	21	22	10
413	50		Female		Technical secondary school		Senior nurse	Other	Emergency Department	26	3000～5999	0	Contract	Married	1	No	Secondary hospital	19	20	10	27	27	103	36	20	26	82	97	30	19	19	19	10
414	44		Female		Junior college		Supervisor nurse	Head nurse	Gastroenterology	25	6000～8999	0	Employed	Married	2	No	Secondary hospital	17	16	8	32	21	94	25	9	9	43	147	44	30	28	30	15
415	54		Female		Technical secondary school		Supervisor nurse	No	Pediatrics	31	3000～5999	0	Employed	Married	1	Yes	Tertiary hospitals	21	18	8	42	20	109	24	6	9	39	141	40	30	28	28	15
416	41		Female		Undergraduate		Senior nurse	No	Pediatrics	20	3000～5999	0	Employed	Married	1	No	Tertiary hospitals	18	15	6	32	23	94	31	9	23	63	112	34	21	24	21	12
417	41		Female		Junior college		Nurse	No	Pediatrics	21	3000～5999	0	Contract	Married	1	No	Tertiary hospitals	15	11	6	27	18	77	36	14	25	75	96	27	21	17	21	10
418	53		Female		Technical secondary school		Supervisor nurse	No	Ward	35	3000～5999	0	Employed	Married	1	Yes	Tertiary hospitals	22	19	7	29	21	98	38	16	18	72	105	29	23	20	21	12
419	55		Female		Technical secondary school		Senior nurse	Other	Outpatient	37	6000～8999	0	Employed	Married	1	No	Secondary hospital	21	15	7	29	19	91	18	6	10	34	110	29	23	22	24	12
420	40		Female		Undergraduate		Supervisor nurse	No	Child five	18	6000～8999	3	Employed	Married	2	No	Tertiary hospitals	16	19	9	34	25	103	26	7	17	50	103	36	17	18	21	11
421	50		Female		Junior college		Co-chief superintendent nurse	Head nurse	Neonatology	30	6000～8999	0	Employed	Married	1	No	Secondary hospital	21	20	8	29	25	103	49	14	24	87	105	25	24	21	22	13
422	50		Female		Junior college		Co-chief superintendent nurse	Responsible group leader/Deputy Head Nurse	Breathe	20	3000～5999	0	Employed	Married	2	No	Secondary hospital	28	20	12	44	36	140	14	15	33	62	150	45	30	30	30	15
423	44		Female		Undergraduate		Senior nurse	Responsible group leader/Deputy Head Nurse	surgical	24	9000～11999	0	Employed	Married	1	No	Tertiary hospitals	7	10	4	24	11	56	16	10	16	42	136	42	28	22	29	15
424	44		Female		Junior college		Senior nurse	No	Internal Medicine	20	3000～5999	3	Compile	Married	2	Yes	Primary hospital	28	17	12	38	36	131	54	30	8	92	150	45	30	30	30	15
425	54		Female		Junior college		Supervisor nurse	No	Endoscopy Center	30	6000～8999	0	Employed	Married	1	Yes	Tertiary hospitals	12	14	6	27	10	69	27	6	28	61	131	36	29	23	28	15
426	42		Female		Junior college		Nurse	No	Internal Medicine	21	3000～5999	2	Contract	Married	2	No	Primary hospital	21	15	9	33	27	105	27	12	22	61	120	36	24	24	24	12
427	42		Female		Technical secondary school		Senior nurse	No	Pediatrics	20	3000～5999	3	Contract	Married	1	Yes	Tertiary hospitals	28	17	11	44	27	127	39	10	8	57	117	17	26	29	30	15
428	48		Female		Undergraduate		Supervisor nurse	No	Emergency Pediatrics	25	6000～8999	0	Employed	Married	1	No	Tertiary hospitals	15	15	9	34	22	95	37	11	15	63	115	33	24	22	24	12
429	43		Female		Undergraduate		Co-chief superintendent nurse	Head nurse	Respiratory Medicine	23	9000～11999	0	Employed	Married	2	Yes	Tertiary hospitals	7	16	3	20	10	56	11	5	9	25	141	43	29	26	28	15
430	51		Female		Undergraduate		Chief superintendent nurse	Other	Medical center	34	6000～8999	0	Employed	Married	1	No	Secondary hospital	17	14	9	27	26	93	21	5	8	34	117	36	24	22	23	12
431	46		Female		Junior college		Senior nurse	No	Respiratory Medicine	25	6000～8999	0	Employed	Married	1	Yes	Tertiary hospitals	10	5	3	30	16	64	15	6	21	42	117	34	23	21	26	13
432	55		Female		Junior college		Supervisor nurse	Head nurse	Pediatrics	33	6000～8999	0	Employed	Married	1	No	Tertiary hospitals	15	13	9	31	21	89	27	14	11	52	101	29	24	19	19	10
433	45		Female		Undergraduate		Senior nurse	No	Gastroscopy room	22	3000～5999	0	Employed	Divorced	1	Yes	Secondary hospital	16	12	3	17	15	63	24	14	13	51	110	36	22	20	22	10
434	42		Female		Junior college		Supervisor nurse	No	Gastroscopy room	20	3000～5999	0	Contract	Married	2	No	Secondary hospital	24	14	12	38	27	115	24	7	40	71	84	25	17	17	17	8
435	42		Female		Undergraduate		Supervisor nurse	No	Respiratory Medicine	21	6000～8999	0	Employed	Married	1	Yes	Tertiary hospitals	10	5	3	14	9	41	9	5	8	22	130	37	30	18	30	15
436	41		Female		Undergraduate		Supervisor nurse	Responsible group leader/Deputy Head Nurse	Pediatrics	20	3000～5999	0	Contract	Married	1	Yes	Tertiary hospitals	18	19	11	42	32	122	36	14	13	63	128	34	29	26	27	12
437	55		Female		Junior college		Supervisor nurse	Other	Internal Medicine	20	6000～8999	3	Employed	Married	1	Yes	Secondary hospital	25	20	12	37	30	124	51	28	17	96	104	23	23	23	23	12
438	44		Female		Undergraduate		Senior nurse	No	Ear, Nose and Throat	20	3000～5999	0	Employed	Married	1	Yes	Tertiary hospitals	24	20	12	33	24	113	43	24	17	84	122	35	26	24	24	13
439	55		Female		Junior college		Co-chief superintendent nurse	Head nurse	obstetrics	34	over 12000	0	Employed	Married	1	Yes	Tertiary hospitals	8	17	7	23	13	68	27	5	8	40	142	44	28	27	28	15
440	49		Female		Junior college		Senior nurse	No	Outpatient department	29	6000～8999	0	Employed	Married	1	No	Tertiary hospitals	25	18	12	36	26	117	46	20	19	85	87	20	19	17	17	14
441	42		Female		Junior college		Supervisor nurse	No	Pediatrics	23	9000～11999	0	Employed	Married	1	Yes	Tertiary hospitals	7	6	3	14	9	39	9	5	48	62	30	9	6	6	6	3
442	45		Female		Undergraduate		Supervisor nurse	Responsible group leader/Deputy Head Nurse	Outpatient department	25	6000～8999	0	Employed	Married	1	No	Tertiary hospitals	16	15	7	36	23	97	30	11	34	75	91	18	22	19	21	11
443	53		Female		Junior college		Supervisor nurse	No	dermatology	32	6000～8999	0	Employed	Married	1	Yes	Tertiary hospitals	23	20	10	42	30	125	16	12	14	42	126	37	26	18	30	15
444	44		Female		Undergraduate		Supervisor nurse	Head nurse	City Hall Clinic	45	6000～8999	0	Employed	Married	1	No	Tertiary hospitals	13	14	5	22	18	72	20	6	13	39	134	40	25	25	29	15
445	44		Female		Undergraduate		Supervisor nurse	No	City Hall Clinic	24	6000～8999	0	Employed	Divorced	1	No	Tertiary hospitals	11	11	5	22	18	67	23	6	15	44	133	40	26	23	29	15
446	43		Female		Junior college		Senior nurse	Head nurse	Cardiopulmonary Intensive Care Unit	25	6000～8999	1	Employed	Married	1	Yes	Tertiary hospitals	7	6	3	15	9	40	15	5	14	34	147	45	30	27	30	15
447	44		Female		Undergraduate		Co-chief superintendent nurse	No	Infectious Diseases	23	6000～8999	0	Employed	Married	1	No	Tertiary hospitals	14	14	9	33	20	90	29	6	18	53	103	29	22	19	22	11
448	49		Female		Junior college		Supervisor nurse	Head nurse	Sterile supply room	29	3000～5999	0	Employed	Married	1	No	Secondary hospital	18	11	9	29	24	91	16	5	12	33	143	43	30	26	29	15
449	43		Female		Junior college		Nurse	No	Burn Plastic Surgery	25	6000～8999	0	Employed	Married	2	Yes	Tertiary hospitals	17	19	12	39	20	107	54	30	11	95	143	41	29	29	30	14
450	48		Female		Junior college		Supervisor nurse	No	Internal Medicine	25	6000～8999	0	Employed	Married	1	No	Tertiary hospitals	16	15	6	34	23	94	22	8	29	59	112	31	26	21	23	11
451	40		Female		Undergraduate		Supervisor nurse	No	Internal Medicine	20	6000～8999	0	Employed	Married	1	No	Tertiary hospitals	17	15	12	29	24	97	31	14	22	67	119	35	24	24	24	12
452	43		Female		Undergraduate		Co-chief superintendent nurse	No	Internal Medicine	23	3000～5999	0	Employed	Married	1	Yes	Tertiary hospitals	15	15	8	31	18	87	14	6	12	32	127	37	26	26	25	13
453	46		Female		Undergraduate		Supervisor nurse	No	Outpatient department	25	3000～5999	0	Employed	Married	1	No	Tertiary hospitals	10	5	3	12	9	39	16	5	36	57	135	41	26	27	30	11
454	45		Female		Undergraduate		Supervisor nurse	No	Outpatient department	25	3000～5999	0	Contract	Married	1	No	Tertiary hospitals	7	20	6	26	15	74	33	5	8	46	150	45	30	30	30	15
455	47		Female		Undergraduate		Senior nurse	No	Neurology II	25	3000～5999	0	Employed	Divorced	1	Yes	Tertiary hospitals	16	14	6	28	26	90	19	5	18	42	121	35	26	24	24	12
456	42		Female		Undergraduate		Co-chief superintendent nurse	Responsible group leader/Deputy Head Nurse	Pediatrics	22	6000～8999	0	Employed	Married	2	Yes	Tertiary hospitals	18	20	9	29	15	91	18	8	10	36	134	41	29	23	28	13
457	40		Female		Undergraduate		Supervisor nurse	No	Pediatrics	20	6000～8999	0	Employed	Married	1	Yes	Tertiary hospitals	20	18	10	35	15	98	20	7	17	44	129	42	24	24	25	14
458	44		Female		Junior college		Senior nurse	No	Cardiology	24	6000～8999	0	Employed	Married	1	Yes	Tertiary hospitals	7	9	3	23	9	51	15	6	13	34	150	45	30	30	30	15
459	45		Female		Junior college		Senior nurse	No	Internal Medicine	25	6000～8999	0	Employed	Married	1	Yes	Tertiary hospitals	21	15	8	31	21	96	22	9	29	60	102	26	24	18	22	12
460	48		Female		Undergraduate		Co-chief superintendent nurse	No	surgical	27	9000～11999	0	Employed	Married	1	Yes	Tertiary hospitals	16	16	7	28	20	87	18	8	14	40	138	41	27	27	29	14
461	47		Female		Junior college		Supervisor nurse	Other	Pediatrics	22	6000～8999	0	Employed	Married	1	No	Tertiary hospitals	22	19	11	37	26	115	31	5	21	57	98	28	20	18	21	11
462	51		Female		Junior college		Co-chief superintendent nurse	No	Pediatrics	30	6000～8999	0	Employed	Married	1	No	Tertiary hospitals	16	11	7	29	18	81	24	9	16	49	110	33	23	19	24	11
463	52		Female		Technical secondary school		Nurse	No	Sterile supply room	37	3000～5999	0	Employed	Married	1	No	Tertiary hospitals	17	15	8	31	25	96	10	5	31	46	114	33	21	24	24	12
464	40		Female		Junior college		Senior nurse	No	Pediatric Second Ward	20	6000～8999	0	Employed	Married	1	No	Tertiary hospitals	14	15	7	30	19	85	38	9	14	61	109	33	23	20	23	10
465	51		Female		Junior college		Co-chief superintendent nurse	No	Pediatrics	28	9000～11999	0	Employed	Married	1	No	Tertiary hospitals	15	12	8	32	19	86	17	7	24	48	113	34	21	23	23	12
466	46		Female		Undergraduate		Co-chief superintendent nurse	Deputy Director/Director of Nursing	Nursing Department	29	over 12000	2	Employed	Death of a spouse	1	No	Tertiary hospitals	16	14	6	25	18	79	18	5	12	35	142	44	29	25	30	14
467	47		Female		Junior college		Nurse	No	One	20	6000～8999	0	Contract	Married	0	No	Tertiary hospitals	11	13	8	29	19	80	51	19	9	79	112	26	27	18	30	11
468	45		Female		Undergraduate		Supervisor nurse	Other	Emergency Department	20	6000～8999	0	Employed	Married	1	Yes	Tertiary hospitals	15	15	8	28	18	84	30	6	34	70	76	24	17	14	14	7
469	40		Female		Junior college		Senior nurse	No	General	20	3000～5999	3	Compile	Unmarried	0	No	Secondary hospital	20	14	8	30	21	93	29	12	21	62	120	34	25	23	26	12
470	48		Female		Undergraduate		Supervisor nurse	Other	obstetrics	24	6000～8999	0	Employed	Divorced	1	No	Tertiary hospitals	7	15	7	27	14	70	11	5	21	37	112	33	24	19	23	13
471	46		Female		Junior college		Supervisor nurse	No	Outpatient	26	6000～8999	0	Employed	Married	2	No	Tertiary hospitals	20	17	8	27	18	90	18	9	21	48	113	28	27	20	25	13
472	55		Female		Undergraduate		Co-chief superintendent nurse	Head nurse	Anorectal	33	9000～11999	0	Employed	Married	1	No	Tertiary hospitals	12	15	5	25	22	79	25	12	11	48	121	33	27	22	26	13
473	54		Female		Junior college		Senior nurse	No	Anorectal	32	6000～8999	0	Employed	Married	1	No	Tertiary hospitals	7	5	3	14	14	43	15	5	8	28	150	45	30	30	30	15
474	43		Female		Undergraduate		Supervisor nurse	No	dermatology	20	6000～8999	0	Employed	Divorced	1	No	Tertiary hospitals	17	14	7	28	18	84	33	7	18	58	127	33	29	26	26	13
475	56		Female		Junior college		Co-chief superintendent nurse	No	old	32	9000～11999	0	Employed	Married	1	No	Tertiary hospitals	7	7	3	19	9	45	11	5	8	24	149	45	30	29	30	15
476	48		Female		Undergraduate		Co-chief superintendent nurse	No	Geriatrics	29	6000～8999	0	Employed	Married	1	No	Tertiary hospitals	18	14	7	29	20	88	32	8	15	55	109	27	22	27	21	12
477	54		Female		Undergraduate		Co-chief superintendent nurse	No	Geriatrics	36	9000～11999	0	Employed	Married	1	No	Tertiary hospitals	15	16	5	22	18	76	18	6	18	42	117	34	25	20	25	13
478	41		Female		Master		Co-chief superintendent nurse	Head nurse	Second Ward of Rehabilitation Medicine	22	6000～8999	0	Employed	Married	1	No	Tertiary hospitals	14	12	7	28	21	82	14	5	25	44	93	26	18	17	22	10
479	45		Female		Undergraduate		Co-chief superintendent nurse	Deputy Dean/Dean	Hospital office	26	over 12000	0	Employed	Married	1	No	Secondary hospital	23	16	10	35	27	111	21	11	21	53	143	42	30	27	29	15
480	44		Female		Undergraduate		Supervisor nurse	No	surgical	23	3000～5999	0	Employed	Married	1	Yes	Tertiary hospitals	24	19	7	37	28	115	27	5	30	62	91	22	20	18	20	11
481	47		Female		Undergraduate		Co-chief superintendent nurse	Deputy Dean/Dean	Administrative management	28	over 12000	3	Contract	Married	1	No	Secondary hospital	16	13	7	26	22	84	13	5	21	39	119	39	24	20	25	11
482	40		Female		Master		Senior nurse	Other	Oncology	20	6000～8999	3	Employed	Married	1	Yes	Tertiary hospitals	17	15	7	28	22	89	23	12	11	46	120	34	24	24	25	13
483	59		Female		Undergraduate		Chief superintendent nurse	Deputy Dean/Dean	Department	38	9000～11999	0	Employed	Married	1	No	Tertiary hospitals	14	15	6	27	26	88	24	12	29	65	115	33	24	22	24	12
484	46		Female		Undergraduate		Co-chief superintendent nurse	Deputy Dean/Dean	administrative	27	6000～8999	1	Employed	Married	1	No	Secondary hospital	27	20	11	39	34	131	13	6	8	27	147	44	30	28	30	15
485	45		Female		Undergraduate		Co-chief superintendent nurse	Deputy Dean/Dean	Hospital office	27	9000～11999	0	Employed	Married	1	No	Secondary hospital	20	14	6	24	19	83	16	5	20	41	132	39	27	24	28	14
486	46		Female		Junior college		Co-chief superintendent nurse	Deputy Dean/Dean	Hospital office	26	9000～11999	0	Employed	Married	1	No	Secondary hospital	14	10	6	22	18	70	18	10	40	68	92	27	20	18	18	9
487	48		Female		Technical secondary school		Supervisor nurse	Deputy Director/Director of Nursing	Nursing Department	26	6000～8999	0	Contract	Married	1	No	Secondary hospital	20	12	7	28	26	93	31	22	22	75	120	36	24	24	24	12
488	40		Female		Undergraduate		Supervisor nurse	Head nurse	Operating room	20	3000～5999	3	Employed	Married	2	No	Secondary hospital	26	17	8	32	27	110	19	5	38	62	90	26	27	15	13	9
489	40		Female		Undergraduate		Supervisor nurse	Head nurse	Integrated Branch	20	3000～5999	0	Employed	Married	1	No	Primary hospital	28	19	10	36	24	117	16	10	21	47	143	43	29	28	29	14
490	53		Female		Undergraduate		Chief superintendent nurse	Deputy Dean/Dean	hospital	32	over 12000	0	Employed	Married	1	Yes	Tertiary hospitals	17	13	5	23	18	76	17	6	32	55	120	35	24	22	25	14
491	47		Female		Junior college		Supervisor nurse	Other	Public Health Division	27	3000～5999	0	Employed	Married	1	Yes	Tertiary hospitals	19	14	6	38	18	95	9	10	8	27	150	45	30	30	30	15
492	50		Female		Junior college		Supervisor nurse	Other	Public Health Branch	27	3000～5999	0	Employed	Divorced	1	Yes	Tertiary hospitals	7	5	3	11	9	35	9	5	8	22	150	45	30	30	30	15
493	44		Female		Undergraduate		Supervisor nurse	No	Pediatrics	23	3000～5999	3	Employed	Married	1	No	Tertiary hospitals	16	14	7	29	21	87	27	6	9	42	124	38	25	24	25	12
494	40		Female		Undergraduate		Senior nurse	No	Technical Services	20	3000～5999	0	Employed	Married	1	No	Secondary hospital	28	20	12	44	36	140	19	5	18	42	150	45	30	30	30	15
495	50		Female		Junior college		Co-chief superintendent nurse	No	Infectious diseases and public health emergencies	25	6000～8999	0	Employed	Married	1	No	Tertiary hospitals	13	12	6	26	11	68	9	5	14	28	129	40	27	23	26	13
496	47		Female		Undergraduate		Co-chief superintendent nurse	Deputy Director/Director of Nursing	Nursing Department	28	9000～11999	0	Employed	Married	1	Yes	Tertiary hospitals	21	18	10	34	24	107	17	6	8	31	127	36	27	25	25	14
497	47		Male		Junior college		Senior nurse	Other	Clinical nursing	27	3000～5999	3	Employed	Married	1	Yes	Primary hospital	19	13	8	28	20	88	24	13	8	45	120	36	24	24	24	12
498	50		Female		Junior college		Nurse	Head nurse	Vaccination Division	30	3000～5999	3	Employed	Married	1	Yes	Primary hospital	19	20	12	29	21	101	44	10	8	62	142	45	26	30	26	15
499	44		Female		Junior college		Co-chief superintendent nurse	No	General	23	6000～8999	0	Employed	Married	1	Yes	Secondary hospital	22	20	12	18	9	81	26	8	17	51	123	38	29	19	26	11
500	50		Female		Junior college		Co-chief superintendent nurse	Other	Public health	30	6000～8999	0	Employed	Divorced	1	Yes	Tertiary hospitals	7	5	3	11	9	35	9	5	8	22	150	45	30	30	30	15
501	41		Female		Undergraduate		Supervisor nurse	Deputy Dean/Dean	Integrated Branch	20	3000～5999	0	Employed	Divorced	1	No	Primary hospital	24	15	10	25	18	92	22	5	17	44	120	34	24	23	26	13
502	54		Female		Undergraduate		Co-chief superintendent nurse	Deputy Director/Director of Nursing	Nursing Department	31	3000～5999	1	Employed	Married	1	No	Primary hospital	22	20	11	28	29	110	25	6	10	41	116	33	24	23	24	12
503	42		Female		Junior college		Senior nurse	Other	Hospital Inpatient Department	20	3000～5999	0	Contract	Married	1	No	Secondary hospital	16	10	6	27	20	79	16	5	18	39	109	31	23	20	23	12
504	40		Female		Master		Senior nurse	Head nurse	Physical examination	20	9000～11999	0	Employed	Divorced	1	Yes	Tertiary hospitals	14	12	9	27	28	90	15	6	14	35	116	32	24	24	24	12
505	44		Female		Master		Co-chief superintendent nurse	Head nurse	Department of Traditional Chinese Medicine	22	9000～11999	0	Employed	Married	1	No	Tertiary hospitals	7	14	9	31	23	84	12	5	13	30	138	44	27	24	28	15
506	42		Female		Undergraduate		Senior nurse	No	icu	20	6000～8999	3	Contract	Married	1	No	Secondary hospital	27	20	12	42	34	135	35	20	23	78	112	32	22	23	23	12
507	45		Male		Junior college		Supervisor nurse	No	surgical	22	6000～8999	3	Employed	Married	2	No	Primary hospital	25	19	12	44	33	133	36	18	27	81	107	32	20	22	22	11
508	49		Female		Junior college		Supervisor nurse	Responsible group leader/Deputy Head Nurse	Pediatrics	26	6000～8999	2	Contract	Married	2	No	Primary hospital	28	20	12	42	27	129	35	16	20	71	87	27	18	16	17	9
509	40		Female		Undergraduate		Senior nurse	No	Operating room	20	9000～11999	0	Employed	Married	1	Yes	Tertiary hospitals	15	15	9	20	22	81	16	5	17	38	119	33	25	25	25	11
510	48		Female		Junior college		Supervisor nurse	Head nurse	Operating room	28	9000～11999	0	Employed	Married	1	Yes	Tertiary hospitals	19	14	7	25	22	87	29	6	14	49	119	32	26	23	24	14
511	42		Female		Junior college		Supervisor nurse	No	Operating room	23	6000～8999	2	Employed	Married	1	Yes	Tertiary hospitals	21	15	9	33	27	105	38	21	29	88	87	24	19	18	18	8
512	54		Female		Master		Chief superintendent nurse	Other	Nursing Department	36	over 12000	0	Employed	Married	1	No	Tertiary hospitals	18	16	9	27	21	91	16	5	15	36	130	39	27	23	28	13
513	40		Female		Master		Co-chief superintendent nurse	Head nurse	ICU	20	9000～11999	1	Employed	Married	1	Yes	Tertiary hospitals	10	11	8	28	21	78	26	15	22	63	113	34	22	22	24	11
514	45		Female		Junior college		Supervisor nurse	Responsible group leader/Deputy Head Nurse	Operating room	26	9000～11999	2	Employed	Married	1	No	Secondary hospital	22	15	6	22	27	92	19	11	32	62	95	24	20	21	18	12
515	40		Female		Undergraduate		Supervisor nurse	Head nurse	surgical	18	3000～5999	0	Employed	Married	1	No	Primary hospital	26	19	11	41	30	127	18	10	13	41	101	26	22	21	22	10
516	42		Female		Master		Co-chief superintendent nurse	Head nurse	Operating room	19	over 12000	0	Employed	Married	2	Yes	Tertiary hospitals	22	16	6	31	30	105	41	22	16	79	130	38	25	28	25	14
517	45		Female		Technical secondary school		Supervisor nurse	Head nurse	Major Surgery	19	9000～11999	2	Employed	Married	2	Yes	Primary hospital	24	19	12	37	31	123	42	24	21	87	128	38	25	25	27	13
518	45		Female		Technical secondary school		Supervisor nurse	No	Operating room	20	6000～8999	0	Employed	Married	1	No	Secondary hospital	23	17	9	34	27	110	36	20	23	79	104	29	21	22	21	11
519	47		Female		Junior college		Senior nurse	No	recovery unit	26	3000～5999	2	Employed	Married	2	No	Secondary hospital	23	20	10	35	29	117	34	16	28	78	100	28	21	19	21	11
520	47		Female		Undergraduate		Senior nurse	No	Gynecology	20	3000～5999	0	Employed	Married	1	No	Tertiary hospitals	19	15	7	24	19	84	19	5	9	33	124	36	26	24	26	12

## Sheet: Job stressors scale
15.The social status of nursing work is too low	16.There are too few opportunities for further studies	17.Low wages and other benefits	18.Too few opportunities for promotion	19.Need to shift frequently	20.Too little independence at work	21.Unclear division of work	22.over work load	23.The number of working nurses is small	24.No time for psychological care of patients	25.Too much non-nursing work	26.Too much useless paperwork	27.Poor working environment	28.Insufficient equipment needed for work	29.The ward is crowded and noisy	30.Worry about mistakes at work	31.The work of a nurse is not recognized by patients and their families	32.The patient is overly ill	33.The patient's family is impolite	34.The patient's request is too high or too much	35.The patient is impolite	36.The patient is not cooperative	37.The knowledge learned cannot meet the psychological needs of patients and their families	38.Lack of knowledge about patient education	39.Worried about the pain caused by the nursing operation	40.Sudden death of nursing patient	41.Lack of understanding and respect from other health workers	42.Insufficient understanding and support of nursing managers	43.Too much criticism from care managers	44.Doctors are too picky about nursing work	45.Lack of understanding and support among colleagues	46.Conflict with care manager	47.It is difficult to work with some nurses in the ward	48.Conflict with the doctor	49.Lack of friendly and cooperative atmosphere among colleagues	Job stressors scores	Nursing profession and work problems	Time allocation and workload	Working environment and equipment Problems	Patient care issues	Management and interpersonal problems
3	3	2	3	2	2	3	3	3	2	2	3	2	3	2	2	3	2	2	3	2	2	3	2	3	2	2	2	3	2	2	2	3	3	3	86	18	13	7	26	22
4	4	4	4	4	4	4	4	4	4	4	4	4	4	4	4	4	4	4	4	4	4	4	4	4	4	4	4	4	4	4	4	4	4	4	140	28	20	12	44	36
4	3	4	4	4	1	3	4	4	3	2	4	3	4	2	3	3	3	4	3	3	2	4	3	2	2	4	2	3	2	2	2	2	2	2	102	23	17	9	32	21
2	3	3	4	3	4	4	4	1	1	2	3	1	1	1	2	2	1	2	2	1	2	1	1	1	2	1	1	1	3	1	1	1	1	1	65	23	11	3	17	11
4	3	4	3	4	1	2	2	4	2	4	3	4	3	2	4	3	3	3	3	3	3	3	3	3	3	3	3	2	2	2	2	1	1	1	96	21	15	9	34	17
1	1	1	1	1	1	1	1	1	1	1	1	1	1	1	1	1	1	1	1	1	1	1	2	2	1	2	2	1	2	2	1	2	2	2	44	7	5	3	13	16
3	3	3	3	1	2	3	4	2	3	3	3	4	4	2	3	2	2	2	2	1	1	2	2	2	1	1	2	1	1	1	1	2	2	2	76	18	15	10	20	13
1	3	1	2	1	1	1	1	1	2	1	1	1	1	1	2	1	1	1	2	1	1	3	1	2	2	1	2	2	1	1	2	1	1	1	48	10	6	3	17	12
2	3	3	3	4	4	4	3	3	3	3	3	3	2	3	2	2	3	3	3	3	3	2	2	2	4	3	3	4	2	3	4	4	4	3	105	23	15	8	29	30
2	1	1	2	1	3	2	3	3	3	4	4	1	2	1	4	3	3	2	2	2	2	2	2	2	1	2	2	2	2	1	1	1	2	2	73	12	17	4	25	15
4	4	1	1	1	1	1	1	2	2	1	1	1	1	1	4	2	1	2	2	2	2	3	2	2	2	3	1	1	2	1	1	1	1	1	59	13	7	3	24	12
1	1	1	1	2	2	1	2	1	1	4	4	3	3	1	4	1	1	1	1	1	1	1	1	1	2	1	3	3	2	2	2	2	2	2	62	9	12	7	15	19
4	4	2	4	3	3	2	4	2	2	4	4	3	3	2	3	3	2	2	3	3	3	4	3	2	1	3	2	2	3	2	3	3	3	2	98	22	16	8	29	23
1	1	1	1	1	2	2	4	4	3	4	2	3	1	1	2	1	1	1	1	1	1	3	2	2	1	1	1	1	2	2	2	2	2	2	62	9	17	5	16	15
1	1	1	1	4	1	1	4	1	1	1	1	1	1	4	4	4	4	4	4	4	4	1	4	4	4	1	4	4	2	4	4	4	4	4	96	10	8	6	41	31
4	4	4	4	4	4	4	4	4	4	4	4	2	4	2	4	2	3	4	2	2	2	4	3	3	2	4	2	4	3	2	2	2	2	2	110	28	20	8	31	23
3	3	3	4	1	3	4	3	3	3	3	4	3	3	3	3	3	3	2	3	3	3	3	3	3	3	3	4	3	3	3	3	3	3	3	106	21	16	9	32	28
4	4	4	4	4	4	3	3	4	3	4	4	4	3	4	4	4	4	4	4	4	4	4	4	4	4	4	4	4	4	4	4	4	4	4	136	27	18	11	44	36
3	3	3	3	2	1	1	2	3	3	3	3	2	3	2	4	3	3	3	3	3	3	3	3	3	3	3	4	3	3	3	2	2	2	2	95	16	14	7	34	24
4	4	3	3	3	4	3	3	4	4	4	4	4	3	4	4	4	4	3	3	3	3	3	3	3	3	4	4	3	3	2	2	2	2	2	114	24	19	11	36	24
4	4	3	4	2	4	3	4	3	3	4	4	2	3	2	4	4	4	3	3	3	3	3	3	3	4	4	4	4	3	3	3	2	2	2	113	24	18	7	37	27
4	4	3	3	3	4	3	3	4	4	4	4	4	3	4	4	4	4	3	3	3	3	3	3	3	3	4	4	3	3	2	2	2	2	2	114	24	19	11	36	24
4	1	4	4	4	1	1	3	3	3	3	3	1	4	3	4	4	4	4	4	2	2	3	4	4	4	4	4	4	1	1	4	2	2	2	105	19	15	8	39	24
4	4	4	4	4	4	4	4	4	4	4	4	4	2	4	4	4	3	3	3	3	3	3	3	2	2	4	4	4	3	3	4	3	3	3	122	28	20	10	33	31
4	3	4	4	2	2	3	3	3	3	4	4	4	4	4	3	3	2	2	2	2	2	2	2	2	2	2	2	2	2	3	2	2	2	2	94	22	17	12	24	19
4	4	4	2	3	3	2	3	2	2	3	3	2	3	3	3	3	2	3	3	3	3	3	3	2	2	3	3	3	3	3	2	2	2	2	96	22	13	8	30	23
3	3	3	3	3	3	3	4	3	3	3	3	3	3	3	3	3	3	3	3	3	3	3	3	3	3	3	3	3	3	3	2	2	2	2	102	21	16	9	33	23
4	4	4	4	1	1	1	4	4	4	4	4	1	1	1	4	4	1	4	4	4	4	4	4	4	1	4	4	4	1	1	1	1	1	1	98	19	20	3	38	18
3	3	3	3	3	3	2	4	4	3	3	3	3	3	2	4	3	2	2	3	2	2	3	3	3	2	3	4	4	4	3	3	2	3	3	103	20	17	8	29	29
1	1	1	1	1	1	1	1	4	2	3	3	1	1	3	4	1	1	3	4	1	1	3	1	4	1	1	1	1	1	1	1	1	1	1	58	7	13	5	24	9
3	3	3	3	3	3	2	4	4	4	4	4	2	2	2	4	3	4	2	2	2	2	3	3	3	1	3	3	2	4	3	2	2	3	2	99	20	20	6	29	24
4	4	4	3	2	1	1	3	4	3	4	4	4	4	4	4	3	2	3	3	3	3	3	3	4	1	4	1	2	3	3	2	2	3	3	104	19	18	12	32	23
3	3	3	3	1	3	3	3	3	4	4	3	3	3	3	4	3	3	2	2	2	2	3	2	3	3	4	2	2	3	2	2	2	3	2	96	19	17	9	29	22
3	3	2	2	3	2	1	4	4	4	4	4	2	2	2	3	3	2	2	2	2	2	2	2	3	1	3	3	3	4	3	1	3	2	2	90	16	20	6	24	24
2	3	2	3	2	2	2	3	3	3	3	2	2	2	4	3	2	2	2	2	2	2	2	2	2	1	2	2	2	2	2	2	2	2	2	78	16	14	8	22	18
3	3	2	3	2	2	1	3	4	3	3	3	2	3	2	4	2	3	3	4	3	4	3	2	2	2	3	3	3	2	2	3	3	2	2	94	16	16	7	32	23
2	2	2	2	2	2	1	3	4	3	2	2	2	2	2	3	3	3	2	3	2	2	2	2	3	3	3	2	2	3	2	2	2	2	2	81	13	14	6	28	20
4	3	4	4	2	3	4	4	4	4	4	4	4	4	4	4	3	4	3	4	3	4	2	2	3	4	3	4	4	4	2	3	2	4	3	121	24	20	12	36	29
2	4	2	2	2	2	2	4	4	4	4	4	2	4	3	4	3	4	2	4	2	2	2	2	3	1	2	4	4	3	3	1	1	1	3	96	16	20	9	29	22
4	4	4	4	1	4	1	3	3	4	4	4	2	3	2	4	2	2	3	3	3	3	2	2	3	3	2	3	3	2	3	2	3	2	3	100	22	18	7	30	23
4	3	2	2	4	3	3	4	3	3	4	2	2	2	3	4	4	3	3	3	3	3	3	2	2	4	3	3	2	3	2	2	3	3	2	101	21	16	7	34	23
3	3	2	2	2	2	2	2	3	3	3	4	2	3	2	4	3	2	3	3	3	3	3	3	3	3	3	3	2	3	3	2	2	2	2	93	16	15	7	33	22
4	3	4	4	4	3	4	4	3	3	4	4	3	3	2	4	4	1	3	3	3	2	2	2	3	4	3	3	3	3	2	2	3	2	3	107	26	18	8	31	24
4	4	2	4	1	1	3	4	4	4	4	2	3	2	2	4	2	3	2	2	2	2	2	1	3	3	2	2	2	2	2	1	2	2	1	86	19	18	7	26	16
4	4	4	4	4	2	3	4	4	2	4	3	2	3	3	4	3	3	3	3	3	3	3	3	3	3	3	3	2	2	2	3	3	3	2	107	25	17	8	34	23
4	4	4	4	2	3	2	4	4	4	4	4	3	2	2	4	4	4	3	4	3	3	3	4	4	2	4	4	4	4	4	4	3	2	3	120	23	20	7	38	32
4	4	4	4	4	4	4	4	4	4	4	4	3	3	4	4	3	3	3	3	3	3	4	4	3	4	3	4	4	3	4	4	4	3	3	127	28	20	10	37	32
2	2	2	2	2	1	1	2	3	3	3	3	2	2	2	3	2	3	3	3	3	3	3	3	3	3	3	3	3	3	3	3	3	3	2	90	12	14	6	32	26
3	3	3	3	3	2	2	3	3	2	3	3	2	3	3	4	3	3	3	3	2	2	3	2	2	2	3	2	3	3	3	2	2	2	2	92	19	14	8	29	22
3	3	2	2	2	1	1	3	4	4	4	4	2	3	2	4	3	2	2	2	2	2	3	3	2	2	3	2	2	2	2	1	2	2	2	85	14	19	7	27	18
3	3	3	3	2	3	2	3	3	3	3	3	4	4	3	3	3	3	3	3	3	3	3	2	2	2	2	2	2	2	2	2	2	2	2	93	19	15	11	30	18
3	3	4	3	3	2	2	4	4	4	4	4	4	2	4	4	2	2	2	3	2	2	4	2	3	4	2	4	3	2	3	2	2	2	1	101	20	20	10	30	21
1	2	2	1	3	1	1	1	2	2	2	2	3	3	3	2	2	3	2	2	1	1	2	1	1	1	2	1	1	2	1	1	1	1	1	58	11	9	9	18	11
3	3	3	4	3	3	3	3	3	4	4	4	4	4	3	3	3	3	3	4	3	3	3	3	3	3	4	4	3	3	3	3	2	3	3	113	22	18	11	34	28
3	2	4	1	2	2	2	2	3	3	3	3	2	2	2	4	3	4	3	2	2	2	2	3	3	3	3	3	2	2	3	2	2	2	2	88	16	14	6	31	21
4	4	4	3	4	4	4	4	4	3	4	4	3	4	4	4	4	4	4	4	4	4	4	4	4	1	4	4	4	4	4	1	4	1	1	125	27	19	11	41	27
3	3	3	3	1	2	2	3	3	3	2	3	3	2	2	3	3	2	2	2	2	2	2	2	2	1	2	2	2	2	2	2	2	1	2	78	17	14	7	23	17
3	3	3	3	3	2	2	3	3	2	3	3	2	3	2	2	2	2	2	3	2	3	2	2	2	2	3	2	2	2	2	2	2	2	2	83	19	14	7	24	19
4	4	3	3	3	3	2	4	4	3	3	3	2	2	2	3	4	3	3	3	3	3	4	3	3	3	3	2	2	4	3	2	2	2	2	102	22	17	6	35	22
3	3	1	1	3	1	1	4	4	3	4	4	1	1	1	4	3	3	1	1	1	1	1	1	3	3	3	3	2	1	1	1	1	1	1	71	13	19	3	22	14
2	2	2	2	2	2	2	3	2	2	3	2	2	2	2	2	2	2	2	2	2	2	2	2	2	2	2	2	2	2	2	2	2	2	2	72	14	12	6	22	18
3	3	3	3	1	2	2	3	3	4	3	2	3	4	2	4	3	2	2	3	2	2	3	3	3	2	3	3	2	2	2	2	2	2	3	91	17	15	9	29	21
3	2	1	1	1	2	3	4	3	2	3	3	2	1	1	3	2	4	4	2	2	4	4	2	3	3	4	3	4	2	4	4	4	4	4	98	13	15	4	33	33
4	4	4	4	4	3	4	4	3	4	4	3	4	3	3	4	4	3	4	4	4	4	4	4	4	3	4	4	3	4	4	4	4	4	4	132	27	18	10	42	35
2	2	2	2	2	2	2	2	3	3	3	3	2	2	2	3	2	2	2	2	2	2	2	3	2	2	3	2	2	2	2	2	2	2	2	77	14	14	6	24	19
4	3	4	2	4	2	3	4	4	3	3	4	4	4	3	4	3	3	3	3	3	3	3	2	3	3	3	3	3	3	3	3	3	3	3	111	22	18	11	33	27
3	2	3	2	4	4	2	4	4	3	2	3	1	1	4	3	3	3	3	3	3	2	2	2	2	2	3	2	2	3	3	3	3	2	3	94	20	16	6	28	24
4	4	4	4	4	4	4	4	4	4	4	4	4	4	4	4	4	4	4	4	4	4	4	4	4	4	4	4	4	4	4	4	4	3	3	138	28	20	12	44	34
1	1	1	1	1	1	1	1	3	2	4	4	1	1	1	1	1	1	1	1	1	1	1	1	1	1	1	1	1	1	1	1	1	3	2	47	7	14	3	11	12
3	4	4	4	3	3	3	3	4	4	3	3	3	3	4	4	4	4	3	3	3	3	3	3	3	3	3	3	3	3	3	3	3	3	3	114	24	17	10	36	27
4	4	4	3	4	2	3	3	4	4	4	4	2	2	2	2	3	3	3	3	3	3	2	2	3	3	3	3	2	2	2	2	2	2	3	100	24	19	6	30	21
4	4	3	3	1	3	1	4	4	3	4	4	1	2	4	4	3	3	4	4	3	2	3	3	4	4	3	3	3	3	3	1	4	1	3	106	19	19	7	37	24
3	3	3	3	4	2	2	3	3	4	3	2	2	2	2	3	3	2	3	3	3	2	2	3	3	2	3	4	2	2	3	2	2	2	2	92	20	15	6	29	22
4	4	4	3	4	4	4	4	4	4	4	4	4	3	3	3	4	3	3	3	2	3	3	2	3	3	4	3	3	4	3	3	3	3	2	117	27	20	10	32	28
3	3	3	3	1	3	3	3	4	3	4	3	2	3	3	3	3	3	3	4	3	3	3	3	3	2	3	2	2	2	3	2	3	2	2	98	19	17	8	33	21
3	3	3	3	1	1	1	3	3	3	3	3	2	2	3	3	3	2	3	3	3	3	2	2	3	2	3	2	2	3	2	2	2	3	2	87	15	15	7	29	21
1	1	2	2	3	1	2	3	3	4	4	2	2	3	3	4	3	3	3	4	3	3	4	3	3	3	4	4	3	3	3	2	2	2	2	97	12	16	8	36	25
2	3	2	3	2	2	3	3	4	3	3	3	3	4	3	4	3	3	3	4	2	2	4	3	4	2	2	3	3	3	2	2	3	2	2	99	17	16	10	34	22
1	1	2	2	1	1	1	4	4	4	3	3	2	2	3	3	2	2	2	2	2	2	2	2	2	2	2	2	2	2	2	2	2	2	2	75	9	18	7	23	18
3	3	3	3	2	2	3	3	3	3	3	3	2	3	3	3	3	2	2	2	2	3	3	3	2	2	3	3	3	2	3	3	3	3	3	95	19	15	8	27	26
2	3	2	2	3	2	2	3	3	3	3	3	2	2	3	4	2	2	3	3	3	2	2	2	2	3	3	2	2	3	2	2	2	2	2	86	16	15	7	28	20
4	3	3	2	3	1	3	3	3	3	3	3	2	2	2	4	4	2	2	2	2	2	3	3	3	3	3	3	2	2	2	2	3	2	2	91	19	15	6	30	21
3	3	3	2	1	2	2	3	3	3	3	3	3	3	3	3	2	2	2	3	2	2	3	3	3	3	2	3	3	3	3	3	3	2	3	93	16	15	9	28	25
2	2	2	2	1	2	2	2	2	2	2	2	2	2	2	1	2	3	2	2	2	3	3	3	3	2	3	2	2	2	2	2	2	2	1	73	13	10	6	26	18
3	2	3	2	1	3	2	3	3	2	3	2	3	2	3	3	2	3	3	3	2	3	3	3	3	3	2	3	2	2	3	2	3	2	2	89	16	13	8	31	21
4	4	2	3	1	3	2	4	4	4	4	4	2	4	4	4	4	2	3	4	3	4	4	4	4	2	4	4	2	4	4	2	2	2	2	113	19	20	10	38	26
3	3	3	3	2	2	2	3	3	3	3	3	2	2	2	3	3	3	2	2	2	2	2	2	2	1	2	3	3	3	2	2	2	2	2	84	18	15	6	24	21
4	2	3	1	3	3	1	4	4	3	4	3	1	3	1	4	3	2	3	3	2	2	3	3	4	1	4	3	4	1	1	2	1	1	1	88	17	18	5	30	18
4	4	3	3	1	1	1	4	3	4	4	4	1	4	4	4	4	1	3	2	2	2	4	4	4	1	4	4	4	4	1	1	1	1	1	97	17	19	9	31	21
3	3	3	3	3	2	2	3	3	3	3	3	2	3	2	3	3	2	3	3	3	3	3	3	3	2	3	3	3	2	3	3	3	2	2	96	19	15	7	31	24
4	2	4	2	1	1	2	2	4	4	4	3	2	4	3	3	2	3	3	3	2	2	2	2	2	2	2	2	2	2	1	4	3	2	1	87	16	17	9	26	19
4	4	4	4	4	4	3	4	4	4	4	4	4	4	4	4	4	3	3	2	3	2	4	4	3	2	4	2	2	4	4	2	3	3	3	120	27	20	12	34	27
2	3	4	3	1	3	3	4	3	3	4	4	2	2	2	4	2	4	2	3	3	3	3	3	3	2	2	3	2	3	3	2	3	2	2	97	19	18	6	32	22
2	3	3	2	3	3	2	3	2	2	3	3	2	3	2	3	3	2	3	3	3	3	3	3	3	3	3	3	3	2	3	2	3	2	2	93	18	13	7	32	23
4	3	3	3	3	2	2	3	3	3	3	3	2	3	2	2	3	2	2	3	3	3	3	2	3	3	3	2	3	3	3	2	2	2	3	94	20	15	7	29	23
3	3	3	3	3	2	2	3	3	3	4	4	2	2	3	3	3	3	2	3	2	2	2	2	3	2	3	3	3	3	3	2	3	2	3	95	19	17	7	27	25
4	4	4	4	1	1	1	4	1	1	4	4	4	4	4	4	4	4	4	4	4	4	1	1	4	4	4	1	1	4	4	1	4	1	4	107	19	14	12	38	24
3	4	3	2	3	2	2	2	2	2	3	3	2	2	2	2	3	2	3	3	2	2	3	3	2	2	2	2	2	2	2	2	2	2	2	82	19	12	6	27	18
3	2	2	2	2	2	2	4	4	3	2	2	2	3	2	3	3	3	2	3	2	2	3	3	3	2	3	2	2	2	2	2	2	2	2	85	15	15	7	29	19
4	4	4	4	1	3	4	3	2	1	3	3	2	3	3	4	3	3	2	3	2	2	3	2	3	2	3	4	3	3	4	2	3	3	2	100	24	12	8	29	27
3	3	3	3	2	2	2	3	3	3	3	3	3	3	2	3	3	3	2	3	2	2	3	3	2	3	2	2	2	2	2	2	2	2	2	88	18	15	8	29	18
2	3	2	3	2	2	2	2	2	3	3	3	3	2	3	2	2	3	3	3	2	2	2	3	3	3	2	2	2	2	2	2	2	2	2	83	16	13	8	28	18
3	3	3	3	3	2	3	3	3	3	3	3	3	3	4	4	3	3	3	2	3	3	3	3	3	3	3	3	3	3	3	3	3	3	3	105	20	15	10	33	27
4	4	3	3	1	1	2	2	4	4	4	4	2	3	3	4	3	3	3	3	1	1	3	3	3	3	2	3	3	3	3	3	3	3	3	100	18	18	8	30	26
3	2	2	1	2	2	2	2	1	2	3	3	3	4	4	3	2	2	2	3	2	3	3	3	3	2	3	3	2	2	3	2	2	2	2	85	14	11	11	28	21
3	4	3	3	3	3	2	3	3	3	3	3	2	3	3	3	3	2	3	3	3	2	3	3	3	3	3	3	2	3	2	2	2	2	2	96	21	15	8	31	21
4	4	4	4	4	1	1	4	4	2	1	1	3	2	1	1	2	3	4	3	3	3	1	1	3	2	3	3	1	3	2	1	2	2	1	84	22	12	6	26	18
4	4	4	4	2	3	3	3	3	3	3	3	3	3	3	4	3	3	3	3	3	3	2	2	4	2	3	3	3	3	3	3	3	3	2	106	24	15	9	32	26
4	4	4	4	1	4	4	4	4	4	4	1	4	1	4	1	4	4	4	4	4	1	4	1	4	4	1	4	1	4	4	4	4	4	1	113	25	17	9	35	27
3	3	3	2	1	3	2	4	4	3	3	4	2	3	1	3	3	2	3	3	2	2	3	2	2	1	3	3	3	3	3	3	2	2	2	91	17	18	6	26	24
2	3	3	3	2	3	3	4	3	3	3	3	3	3	3	3	3	3	3	3	3	3	3	3	3	1	3	3	3	2	2	2	3	2	3	98	19	16	9	31	23
4	4	3	4	4	3	3	2	4	4	3	3	3	3	3	3	1	3	2	2	2	2	2	2	3	3	3	3	3	3	3	2	2	2	2	98	25	16	9	25	23
4	4	3	4	2	4	2	3	4	4	4	4	2	2	2	3	3	3	4	3	3	3	2	3	3	3	4	3	3	3	4	2	4	2	4	110	23	19	6	33	29
3	3	3	3	3	3	3	3	3	3	3	3	2	2	3	3	3	3	3	3	3	3	3	3	3	2	3	3	3	3	2	2	2	2	2	97	21	15	7	32	22
4	4	4	4	3	2	3	2	4	4	4	4	2	2	2	3	4	3	4	4	4	4	2	2	2	2	3	3	2	3	2	2	2	2	1	102	24	18	6	34	20
4	3	4	4	4	4	3	4	4	4	4	4	4	4	4	4	4	4	4	4	4	4	3	3	3	3	4	4	4	4	4	4	4	4	4	134	26	20	12	40	36
3	3	3	3	3	2	2	3	3	3	3	3	2	2	3	3	2	3	2	2	2	2	3	2	3	3	3	3	3	3	3	3	3	3	3	95	19	15	7	27	27
4	4	4	4	1	4	4	4	4	4	1	1	4	4	4	4	4	1	4	4	4	4	4	4	4	4	4	4	4	4	4	4	4	4	4	128	25	14	12	41	36
2	2	2	2	3	2	2	2	3	2	2	2	2	2	2	3	2	2	2	2	2	2	2	2	2	2	2	2	2	2	2	2	2	2	2	73	15	11	6	23	18
3	3	3	3	2	2	2	4	4	3	3	3	3	2	3	4	3	2	3	3	2	2	2	2	3	3	3	3	3	3	2	2	2	2	2	94	18	17	8	29	22
2	3	2	4	2	3	3	3	4	4	4	4	1	1	1	4	2	2	2	2	2	2	2	2	3	1	2	3	3	2	1	1	1	1	1	80	19	19	3	24	15
3	3	3	3	2	3	3	3	3	3	3	3	3	3	3	3	3	3	2	3	2	2	3	3	3	3	3	3	3	3	3	3	3	3	3	101	20	15	9	30	27
2	1	2	1	1	1	2	2	3	3	3	3	1	2	2	3	1	1	2	2	2	2	2	2	3	1	1	1	1	2	2	2	1	1	1	62	10	14	5	21	12
4	4	3	3	2	4	3	4	3	4	4	4	3	2	4	4	4	2	3	4	3	4	4	3	3	1	4	4	4	2	3	3	3	2	2	113	23	19	9	35	27
4	3	2	2	1	2	2	2	4	4	4	4	2	3	3	3	1	3	3	3	3	3	3	3	3	2	3	3	3	3	3	3	3	3	3	99	16	18	8	30	27
3	4	3	3	3	3	3	3	4	4	4	2	3	3	4	4	3	2	3	3	3	3	3	2	3	1	2	1	1	2	2	1	2	1	2	93	22	17	10	30	14
1	1	1	1	1	1	1	4	1	1	1	1	1	1	1	1	3	1	2	3	2	2	2	2	1	1	1	1	1	1	1	1	1	1	1	47	7	8	3	20	9
3	3	3	3	4	3	2	4	4	3	3	2	3	3	3	3	3	2	2	2	2	2	2	3	2	2	2	3	2	2	2	1	2	2	2	89	21	16	9	25	18
1	3	3	3	2	2	3	3	3	3	3	3	2	3	3	3	3	3	3	4	3	3	2	2	3	2	3	3	3	3	3	2	2	3	3	96	17	15	8	31	25
3	3	3	3	2	2	2	2	3	3	3	3	2	2	2	3	3	3	3	3	3	3	3	2	3	2	2	3	3	2	2	2	2	2	2	89	18	14	6	31	20
2	2	3	2	2	2	2	2	3	3	2	2	2	2	2	3	2	3	2	2	2	2	2	2	2	2	2	3	2	2	2	2	2	2	2	76	15	12	6	24	19
2	4	2	2	1	2	1	4	2	1	1	1	1	1	1	2	1	1	1	1	1	1	1	1	1	1	2	4	2	2	1	2	1	2	2	56	14	9	3	12	18
3	2	3	3	1	2	2	3	3	3	3	3	2	3	3	3	2	2	2	2	2	2	2	2	2	2	2	2	2	2	2	2	2	2	2	80	16	15	8	23	18
4	4	4	4	3	1	1	4	4	4	4	4	4	4	4	4	4	4	4	4	4	1	4	4	4	4	4	4	4	4	1	1	4	4	4	124	21	20	12	41	30
2	2	3	2	2	2	2	3	3	3	3	3	2	2	2	2	3	3	3	3	3	3	3	3	3	2	4	3	2	3	2	3	2	2	3	91	15	15	6	31	24
3	3	3	3	4	2	2	4	3	3	4	4	4	2	3	4	2	3	2	2	2	2	3	3	3	3	3	4	4	4	3	3	2	3	3	105	20	18	9	29	29
2	2	3	2	2	2	2	2	3	3	3	3	2	2	3	2	2	2	2	2	2	2	2	2	2	2	2	2	2	2	2	2	2	2	2	76	15	14	7	22	18
4	3	4	3	1	1	3	4	3	4	4	4	1	2	1	4	4	3	4	4	4	4	4	4	4	2	2	4	4	2	2	2	3	2	2	106	19	19	4	41	23
3	3	3	3	2	2	2	4	4	4	4	4	3	2	3	4	3	2	2	3	2	2	3	3	3	1	3	3	3	4	3	2	3	2	2	99	18	20	8	28	25
4	4	3	2	2	2	2	3	3	2	4	3	3	2	3	4	3	3	3	2	2	3	2	2	2	3	4	2	3	3	3	2	2	3	2	95	19	15	8	29	24
3	4	3	3	3	4	1	4	1	3	4	4	4	1	2	4	4	4	3	4	2	2	2	2	1	2	3	3	3	4	3	2	2	2	3	99	21	16	7	30	25
4	1	1	1	1	1	1	1	1	1	1	1	1	1	1	4	4	4	4	3	4	4	1	1	4	1	4	1	1	1	1	1	1	1	1	64	10	5	3	34	12
3	3	4	3	3	3	3	4	4	3	3	3	3	3	3	4	4	3	4	4	4	4	3	3	4	2	3	4	4	4	3	2	3	2	3	115	22	17	9	39	28
2	2	3	2	2	2	2	3	2	1	3	3	2	2	2	3	3	4	3	4	4	3	2	2	3	2	3	2	2	3	2	2	2	2	1	85	15	12	6	33	19
4	3	3	4	1	3	1	4	4	2	3	3	2	3	2	3	2	3	2	3	3	3	3	3	3	3	3	3	3	3	2	2	3	3	2	97	19	16	7	31	24
4	4	4	1	4	1	4	4	4	1	1	4	4	4	1	4	4	4	1	4	4	4	4	1	1	1	4	1	4	1	4	4	4	4	4	107	22	14	9	32	30
2	3	3	2	2	2	2	2	2	4	3	3	2	3	2	4	3	2	2	2	2	2	3	3	2	2	3	3	2	2	2	2	2	2	2	84	16	14	7	27	20
2	2	3	2	2	2	3	4	4	4	4	3	4	3	4	4	4	3	3	3	3	3	3	3	3	2	3	3	2	3	3	1	3	2	3	103	16	19	11	34	23
3	3	3	2	3	2	2	3	3	2	2	2	2	3	3	3	4	3	4	4	4	4	3	2	4	3	3	3	3	4	3	3	2	2	3	102	18	12	8	38	26
3	3	4	3	2	4	3	4	4	4	4	4	3	4	4	4	3	3	3	4	3	3	4	3	3	4	4	3	3	3	2	2	2	3	2	114	22	20	11	37	24
4	4	4	4	3	3	4	3	3	3	3	3	2	3	3	3	2	2	2	3	2	2	1	1	2	3	3	3	3	3	3	3	3	2	2	97	26	15	8	23	25
3	4	2	3	2	3	2	3	3	3	3	3	2	2	3	4	3	3	2	2	1	2	3	3	4	2	2	2	2	2	2	1	2	1	1	85	19	15	7	29	15
3	3	3	3	1	3	2	3	3	3	3	3	3	3	3	3	3	3	3	3	3	3	3	3	3	3	4	3	3	3	3	3	3	3	3	103	18	15	9	33	28
2	2	2	3	2	1	2	2	3	3	2	2	2	2	2	3	2	3	2	3	2	2	3	3	3	2	3	3	2	2	2	2	2	2	2	80	14	12	6	28	20
3	4	4	4	2	2	2	2	2	2	3	3	2	2	2	3	2	2	2	2	2	2	2	2	3	2	3	3	3	3	2	2	3	2	2	86	21	12	6	24	23
4	4	3	3	1	3	4	4	4	4	4	4	3	3	3	4	3	2	3	4	4	3	4	3	3	4	4	4	3	4	4	3	3	2	4	119	22	20	9	37	31
3	3	3	2	1	2	2	3	3	3	3	3	2	3	3	3	3	2	2	3	3	3	3	3	3	3	3	3	2	3	2	2	2	2	2	91	16	15	8	31	21
3	3	3	3	3	2	2	3	3	3	3	3	3	3	3	2	3	3	3	3	3	3	3	3	3	2	3	3	3	2	3	2	3	2	2	97	19	15	9	31	23
4	4	4	4	4	3	3	4	4	4	4	4	2	2	2	4	3	3	3	2	2	2	3	2	3	2	3	3	2	2	2	2	2	2	2	101	26	20	6	29	20
3	3	3	3	3	2	2	2	3	2	2	2	2	2	2	3	2	2	2	2	2	2	3	2	2	2	3	3	2	3	2	2	2	2	2	81	19	11	6	24	21
3	2	4	2	1	1	1	4	4	2	3	3	3	2	4	4	2	2	2	2	2	2	2	1	4	1	3	2	2	2	2	1	1	1	1	78	14	16	9	24	15
4	4	4	2	2	2	3	3	3	4	4	3	3	3	2	3	4	3	2	4	3	3	3	3	3	2	3	4	3	3	3	1	2	2	2	102	21	17	8	33	23
4	3	4	4	3	4	3	4	4	4	4	4	4	4	4	4	4	4	4	4	4	4	4	4	4	3	4	4	4	4	4	4	4	4	4	136	25	20	12	43	36
2	3	2	2	2	3	2	2	2	3	3	4	2	3	3	3	3	2	2	2	2	2	3	2	2	2	2	2	2	2	3	2	2	2	3	83	16	14	8	25	20
3	3	3	3	2	3	3	2	3	3	4	4	2	2	3	4	4	2	3	3	3	3	3	4	2	3	3	3	3	4	3	3	3	3	3	105	20	16	7	34	28
3	4	4	4	3	1	2	4	4	3	3	3	2	2	2	4	3	3	2	3	3	3	2	3	2	3	3	4	3	2	2	2	2	2	2	97	21	17	6	31	22
4	4	2	4	1	2	3	4	4	4	4	4	1	3	3	4	4	3	3	3	3	3	3	3	3	4	3	3	3	3	2	3	2	2	3	107	20	20	7	36	24
4	4	4	4	1	1	1	4	3	4	4	4	4	3	4	2	4	1	4	3	4	3	1	1	1	1	3	4	3	3	4	2	3	1	3	100	19	19	11	25	26
2	3	3	3	3	3	2	3	3	2	3	3	2	3	2	3	3	2	2	3	2	2	3	3	3	2	3	3	2	3	2	2	2	2	2	89	19	14	7	28	21
4	4	4	4	4	3	3	4	4	4	4	4	4	3	4	4	4	3	3	3	2	2	4	3	4	4	4	3	3	4	3	2	3	3	3	121	26	20	11	36	28
4	4	4	4	1	1	4	4	4	4	4	4	4	4	4	4	4	4	4	4	4	4	4	4	4	4	4	4	4	4	4	4	4	4	4	134	22	20	12	44	36
4	4	4	4	4	4	4	4	4	3	4	4	3	4	4	4	3	3	3	3	3	3	2	3	3	3	3	3	3	3	3	2	3	3	3	117	28	19	11	33	26
2	3	2	2	2	2	2	2	2	2	2	3	2	2	2	2	2	2	2	2	2	2	2	2	2	2	2	3	2	3	2	2	2	2	2	74	15	11	6	22	20
3	3	2	2	3	3	2	3	3	2	3	2	2	3	3	3	3	2	2	2	2	2	2	3	3	2	2	2	2	2	2	2	2	2	2	83	18	13	8	26	18
2	3	2	3	2	3	2	3	3	3	3	3	2	2	2	3	3	2	2	3	2	3	3	3	3	2	2	2	2	2	2	2	3	2	2	86	17	15	6	29	19
2	2	2	2	3	2	2	4	4	2	2	2	2	2	2	3	2	3	2	2	2	2	2	2	3	2	2	2	2	3	3	2	3	2	3	82	15	14	6	25	22
3	2	2	2	2	1	1	1	3	3	3	3	3	2	1	2	2	2	3	2	2	2	3	2	3	2	2	2	3	2	3	2	2	2	2	77	13	13	6	25	20
4	4	4	4	3	3	4	4	4	4	4	4	2	3	3	3	4	3	3	3	3	3	3	3	3	3	4	3	3	3	3	3	3	3	3	116	26	20	8	34	28
1	4	4	1	1	4	1	4	1	1	1	4	1	4	1	4	4	4	4	4	1	4	4	1	1	1	4	4	1	1	1	1	4	1	1	83	16	11	6	32	18
2	3	2	2	3	2	2	3	3	3	3	3	2	2	2	3	3	3	2	2	2	2	3	3	3	2	3	2	2	2	2	2	2	2	2	84	16	15	6	28	19
2	4	4	4	2	4	4	3	2	3	3	3	2	3	3	3	3	3	3	3	3	3	3	3	3	1	2	2	2	3	2	2	2	1	1	94	24	14	8	31	17
4	4	4	4	3	1	1	4	4	4	4	4	3	2	3	4	4	3	4	4	4	4	2	3	2	1	4	4	3	4	4	2	4	1	2	112	21	20	8	35	28
3	2	2	2	3	3	2	2	2	2	2	3	2	2	2	3	3	2	3	3	3	3	3	3	3	3	3	2	2	3	3	2	3	2	2	88	17	11	6	32	22
3	4	2	4	1	2	2	4	4	3	4	4	4	3	4	4	2	3	2	2	2	2	3	2	3	2	2	2	2	2	1	2	2	2	2	92	18	19	11	27	17
4	3	4	4	3	3	3	3	4	4	4	4	2	2	4	2	3	2	2	2	2	2	1	1	1	1	4	4	2	4	4	2	2	2	2	96	24	19	8	19	26
3	3	3	3	3	3	3	3	3	3	3	3	2	2	2	3	3	3	3	3	3	2	3	2	3	2	3	2	2	3	3	2	3	3	2	95	21	15	6	30	23
2	2	3	2	1	2	1	2	2	2	2	2	2	1	2	4	3	3	3	3	3	3	3	3	2	3	3	3	3	3	3	2	2	2	2	84	13	10	5	33	23
3	3	2	2	2	2	2	3	4	3	3	3	2	3	3	3	3	3	3	3	3	3	3	3	3	3	3	3	3	3	3	2	3	2	2	97	16	16	8	33	24
4	3	4	2	2	2	2	4	4	2	3	3	3	3	2	3	4	3	3	3	2	2	3	2	3	2	3	2	2	3	3	3	3	2	2	96	19	16	8	30	23
3	4	3	4	3	1	1	3	3	2	3	3	3	3	3	3	3	3	2	3	2	2	3	2	3	2	3	3	2	2	2	2	2	2	2	90	19	14	9	28	20
2	2	2	2	2	2	2	2	2	2	2	2	2	2	3	2	2	2	2	2	2	2	2	2	3	2	2	2	2	2	2	2	2	2	2	72	14	10	7	23	18
1	4	4	4	4	1	1	4	4	1	1	4	4	4	1	1	1	1	4	4	1	1	4	1	1	1	4	4	4	4	1	1	1	1	1	83	19	14	9	20	21
4	4	4	4	4	1	4	4	4	4	4	4	4	4	4	4	4	1	2	4	2	3	4	4	4	2	3	3	3	3	3	3	3	3	3	118	25	20	12	34	27
4	4	4	3	2	1	2	4	4	4	4	4	3	3	2	4	4	4	4	4	3	3	3	4	4	3	3	4	4	2	4	4	2	2	3	116	20	20	8	40	28
3	2	3	1	1	1	1	3	3	1	1	1	1	1	1	3	1	1	3	1	3	3	1	1	3	1	3	3	1	3	3	1	1	1	1	62	12	9	3	21	17
1	4	1	3	1	1	1	4	4	4	4	4	1	4	1	4	1	1	4	4	3	3	4	4	1	1	1	1	3	4	4	1	1	1	1	85	12	20	6	30	17
2	4	3	4	3	3	4	3	3	4	4	4	3	3	3	2	3	2	3	3	3	3	4	3	2	2	3	4	3	3	3	3	4	3	3	109	23	18	9	30	29
3	3	4	3	3	2	2	4	4	3	4	4	3	3	4	4	3	3	3	4	4	3	2	3	3	3	3	4	4	4	3	4	2	3	2	113	20	19	10	35	29
4	1	4	1	1	1	3	3	3	3	3	3	3	3	3	3	3	3	3	3	3	3	3	3	3	3	3	3	3	3	3	3	3	3	3	99	15	15	9	33	27
1	3	1	4	1	1	1	1	4	1	1	1	1	1	1	1	4	2	4	3	2	3	2	1	1	1	1	1	1	1	1	1	1	1	1	56	12	8	3	24	9
2	2	2	2	3	1	2	3	3	2	2	2	2	2	3	3	2	3	2	2	2	2	2	2	3	2	2	2	2	2	2	2	2	2	2	76	14	12	7	25	18
4	3	4	4	4	4	3	3	4	3	4	4	4	4	4	4	4	4	4	4	4	4	4	4	4	3	4	4	4	4	4	3	3	2	3	130	26	18	12	43	31
3	4	3	3	3	3	3	3	3	2	3	3	3	3	2	3	3	2	2	3	2	2	2	2	2	3	3	2	2	2	2	2	2	2	2	89	22	14	8	26	19
3	3	4	3	4	3	2	3	4	3	3	2	3	2	3	3	3	2	2	2	2	2	2	3	2	2	2	2	2	2	2	2	2	2	2	88	22	15	8	25	18
4	4	3	4	3	1	1	4	3	3	3	2	1	2	1	3	3	1	2	2	2	3	2	2	2	2	2	2	2	2	3	2	3	2	2	83	20	15	4	24	20
3	3	3	3	1	1	1	3	1	1	1	1	1	1	1	1	1	1	1	1	1	1	1	1	1	1	1	1	1	1	1	1	1	1	1	45	15	7	3	11	9
3	3	3	3	3	3	3	3	3	3	3	3	2	2	2	3	3	2	2	3	2	2	3	3	2	2	3	2	2	3	3	2	2	2	2	90	21	15	6	27	21
4	4	4	4	4	4	1	4	4	1	1	4	1	4	4	4	4	1	4	4	4	4	4	4	4	1	4	4	4	4	4	4	4	1	4	119	25	14	9	38	33
3	2	3	3	3	2	2	3	3	2	2	2	2	2	2	2	2	2	3	3	3	3	2	2	2	2	2	3	2	2	2	2	2	2	2	81	18	12	6	26	19
2	3	3	3	3	2	3	3	3	2	3	3	2	3	2	3	2	3	3	2	2	2	2	2	3	2	3	2	3	3	2	2	3	2	2	88	19	14	7	26	22
4	2	3	2	4	4	2	4	2	1	2	2	2	1	2	3	2	1	1	1	1	1	1	1	2	2	2	3	2	3	2	2	2	2	2	73	21	11	5	16	20
2	2	2	2	2	2	1	2	2	1	1	1	2	2	3	3	2	2	3	2	2	2	2	2	3	2	3	2	2	2	2	1	3	2	2	71	13	7	7	25	19
4	4	4	3	1	1	4	4	4	4	4	4	4	4	4	1	4	4	4	4	4	4	4	4	4	1	4	4	4	4	4	4	4	4	4	127	21	20	12	38	36
3	3	3	3	3	3	3	3	3	3	3	3	3	3	3	3	3	3	2	3	2	2	3	3	3	3	3	3	3	3	2	3	2	2	2	98	21	15	9	30	23
1	4	4	3	1	1	1	2	2	2	2	2	2	2	2	4	2	2	2	2	2	2	4	3	3	2	3	2	2	2	2	2	2	2	2	78	15	10	6	28	19
4	1	3	3	3	2	2	4	4	3	4	4	1	2	2	4	4	3	4	4	4	4	3	3	3	4	4	1	1	3	3	2	3	3	3	105	18	19	5	40	23
4	1	4	1	4	1	1	4	4	4	4	1	4	4	1	4	4	1	4	4	4	4	1	1	4	1	4	1	1	4	1	1	1	1	1	89	16	17	9	32	15
4	3	4	4	2	2	2	3	3	3	3	3	3	3	2	2	3	3	3	3	3	3	3	3	3	3	3	3	3	3	3	3	3	3	3	103	21	15	8	32	27
4	4	4	4	4	4	4	4	4	4	4	4	4	4	4	4	4	2	3	4	3	3	4	4	4	4	4	4	4	4	4	4	4	3	4	134	28	20	12	39	35
4	4	4	3	3	1	1	1	4	3	3	4	2	4	1	3	3	1	3	3	3	3	3	3	3	1	2	4	3	1	1	1	1	1	1	86	20	15	7	29	15
4	1	4	1	2	2	2	3	3	3	3	3	2	3	2	3	2	2	2	2	2	2	2	2	3	2	3	2	2	4	3	2	2	4	3	87	16	15	7	24	25
2	2	2	3	1	1	1	1	2	2	2	2	2	3	2	3	2	2	2	2	2	2	3	3	3	2	2	1	2	2	1	2	2	2	2	70	12	9	7	26	16
4	2	3	2	3	2	2	4	4	3	2	3	3	4	4	4	4	3	3	4	4	4	4	4	4	3	3	3	3	4	3	2	2	2	2	110	18	16	11	41	24
1	1	1	1	4	1	1	1	4	1	4	1	1	1	1	1	1	4	2	2	2	3	3	3	3	3	2	2	2	2	2	2	2	2	2	69	10	11	3	27	18
3	3	2	3	3	2	2	3	3	2	3	3	2	2	3	3	2	3	2	2	2	2	2	2	2	2	3	2	2	2	2	2	2	2	2	82	18	14	7	24	19
1	4	2	4	2	3	2	2	3	2	3	3	2	3	2	2	2	2	2	2	2	2	2	2	3	2	2	3	3	2	3	2	3	2	2	83	18	13	7	23	22
1	3	3	3	3	2	1	1	3	1	1	1	1	1	1	3	1	1	1	3	3	3	1	1	1	1	1	1	1	3	1	3	1	1	1	58	16	7	3	19	13
3	3	3	3	3	3	3	3	3	3	3	3	2	2	3	3	3	2	2	3	2	2	3	2	2	3	3	3	3	3	3	3	3	3	3	97	21	15	7	27	27
4	3	4	3	4	2	3	3	3	3	2	2	2	3	3	3	3	3	4	4	4	4	3	3	3	3	3	3	2	3	3	3	3	3	3	107	23	13	8	37	26
1	3	3	3	3	2	2	2	3	3	2	3	2	3	2	2	3	3	3	3	3	3	2	3	3	2	3	3	2	2	2	2	2	2	2	87	17	13	7	30	20
3	4	4	4	4	4	3	3	3	3	4	4	3	3	3	3	3	3	3	3	3	3	2	3	3	2	2	3	3	2	3	2	3	2	3	106	26	17	9	31	23
3	4	3	3	3	3	3	3	3	3	3	3	3	3	3	3	3	2	3	3	3	3	3	3	3	3	3	3	3	3	2	2	2	2	2	100	22	15	9	32	22
4	3	3	3	3	2	2	2	3	2	2	3	2	3	2	2	2	2	2	3	3	3	3	2	2	2	3	3	3	3	2	2	2	2	2	87	20	12	7	26	22
2	4	2	2	1	3	2	4	4	3	4	4	1	4	1	4	1	1	1	2	1	3	1	2	1	3	3	3	1	3	1	1	1	1	1	76	16	19	6	20	15
2	4	2	4	2	4	1	1	4	4	4	4	1	1	1	1	4	1	4	4	4	4	1	4	1	1	4	1	1	1	1	1	1	1	1	80	19	17	3	29	12
4	2	4	2	4	1	1	4	4	3	3	3	1	1	2	3	3	1	2	2	2	2	2	1	3	1	1	2	3	3	2	2	2	1	1	78	18	17	4	22	17
3	2	3	2	2	3	2	3	3	3	3	3	3	3	3	3	3	3	2	2	2	2	3	2	3	2	2	3	2	2	2	2	2	2	2	87	17	15	9	27	19
1	1	1	1	1	1	1	2	2	2	3	2	2	3	2	3	3	2	3	3	3	3	3	3	3	1	3	3	2	2	2	2	2	2	2	75	7	11	7	30	20
4	3	3	2	2	2	2	3	3	2	3	4	3	3	2	3	2	2	2	2	2	2	2	2	3	2	3	3	3	2	2	2	2	2	2	86	18	15	8	24	21
4	4	4	4	1	4	2	4	3	1	4	4	2	4	4	4	3	3	3	3	3	2	2	2	4	1	4	4	4	4	4	2	2	2	2	107	23	16	10	30	28
4	4	4	4	3	3	3	4	4	3	3	4	3	4	4	4	4	3	4	3	3	3	3	3	3	2	3	3	4	4	4	4	4	3	1	119	25	18	11	35	30
4	4	4	4	4	4	4	4	4	4	3	4	3	4	4	3	4	3	3	3	3	3	2	2	2	2	2	3	2	2	2	2	2	2	2	107	28	19	11	30	19
4	4	4	3	2	2	2	3	3	2	3	3	3	3	3	3	2	2	3	2	3	3	2	3	3	2	3	2	2	2	2	2	2	2	2	91	21	14	9	28	19
2	3	2	4	3	3	2	4	4	2	4	3	4	3	4	3	3	3	3	3	3	3	3	3	3	2	3	3	3	3	2	2	2	2	2	101	19	17	11	32	22
3	1	2	1	1	3	3	3	3	3	2	3	1	2	1	3	3	3	3	3	3	3	3	3	3	2	3	4	4	3	4	3	3	3	3	94	14	14	4	32	30
4	2	4	3	4	2	3	4	4	3	2	2	3	2	3	3	4	4	3	3	3	3	3	2	3	2	3	2	2	3	3	2	3	3	3	102	22	15	8	33	24
3	3	2	3	3	2	2	2	2	3	3	3	3	3	2	4	2	2	2	2	2	3	3	3	2	2	2	3	3	3	2	2	2	3	2	88	18	13	8	27	22
4	4	4	4	3	4	4	4	4	4	4	4	2	4	2	4	4	2	4	4	4	4	4	4	4	4	4	4	4	4	4	4	4	4	4	133	27	20	8	42	36
4	4	4	4	4	4	4	4	4	4	4	4	4	4	4	4	4	4	4	4	4	4	4	4	4	4	4	4	4	4	4	4	4	4	4	140	28	20	12	44	36
4	4	2	3	2	4	2	4	3	4	4	4	2	3	2	4	3	3	2	2	2	2	3	2	3	1	2	3	2	4	2	1	2	3	1	94	21	19	7	27	20
4	4	4	4	4	4	4	4	4	4	4	4	4	4	4	4	4	4	4	4	4	4	4	4	4	1	4	4	4	4	4	4	4	4	4	137	28	20	12	41	36
4	4	4	4	3	2	3	3	4	4	4	4	4	4	4	4	4	1	4	4	4	4	4	4	4	4	4	4	3	3	3	3	4	4	4	128	24	19	12	41	32
4	4	3	4	3	2	1	4	4	4	4	4	1	2	2	4	3	4	4	4	3	3	4	4	4	3	4	3	4	4	4	4	3	3	3	118	21	20	5	40	32
4	2	4	3	4	3	3	4	4	4	4	4	4	4	4	4	4	4	4	4	3	3	3	3	3	3	3	3	3	3	3	3	3	3	3	120	23	20	12	38	27
3	2	3	2	2	2	2	3	3	3	3	3	2	3	2	3	3	3	2	2	2	2	2	3	2	3	3	2	2	2	2	2	2	2	2	84	16	15	7	27	19
4	4	3	3	4	3	2	4	4	3	4	4	3	3	3	3	3	3	3	3	3	3	3	4	4	4	3	4	4	4	3	3	3	3	3	117	23	19	9	36	30
1	1	1	1	1	1	1	1	3	4	4	1	4	1	1	4	4	3	1	1	3	1	3	1	1	1	1	1	1	1	1	1	1	3	3	62	7	13	6	23	13
4	4	4	4	4	4	3	4	4	3	4	4	3	4	3	4	4	3	3	3	3	3	3	2	4	4	3	3	2	3	3	2	2	2	2	114	27	19	10	36	22
3	3	4	3	3	3	3	3	3	3	4	4	4	3	4	3	3	3	3	3	3	3	3	3	3	3	3	4	3	3	3	3	3	3	3	111	22	17	11	33	28
3	4	4	4	4	3	3	3	3	3	3	3	3	3	3	4	3	2	3	2	2	2	2	2	3	2	2	3	2	2	2	2	2	2	2	95	25	15	9	27	19
4	3	4	3	4	4	2	4	4	4	3	4	4	4	4	3	4	3	4	4	3	3	4	4	4	2	4	4	4	3	4	4	3	4	4	127	24	19	12	38	34
4	3	4	3	2	2	2	3	4	3	4	4	3	3	4	3	3	3	3	3	3	3	3	3	3	3	2	3	3	2	3	3	2	2	2	103	20	18	10	33	22
4	4	4	4	2	3	3	3	4	4	3	4	4	4	4	4	3	3	2	3	3	3	2	3	1	1	3	3	3	3	2	2	2	2	2	104	24	18	12	28	22
3	3	3	3	3	3	3	3	3	2	3	3	2	2	2	3	3	2	3	3	3	3	3	2	2	2	3	3	3	3	3	2	2	2	2	93	21	14	6	29	23
4	4	4	4	4	4	4	4	4	4	4	4	4	4	4	4	4	4	4	4	4	4	4	4	4	4	4	4	4	3	4	4	4	4	4	139	28	20	12	44	35
4	4	4	4	4	1	4	4	4	4	4	4	4	2	4	4	4	4	4	4	4	4	4	1	4	4	4	4	4	4	4	4	4	2	4	130	25	20	10	41	34
2	1	2	2	2	1	1	3	3	1	2	1	2	2	2	3	2	2	2	2	2	2	2	2	3	2	2	2	2	2	2	2	2	2	2	69	11	10	6	24	18
3	3	3	3	2	2	2	3	3	3	3	3	2	3	3	3	3	2	3	2	3	3	3	3	3	2	3	3	3	3	3	2	3	2	3	96	18	15	8	30	25
2	4	2	4	1	4	4	4	4	3	4	4	2	4	4	4	4	2	2	3	2	2	3	3	4	2	3	3	3	3	3	3	3	2	2	106	21	19	10	31	25
4	4	4	4	4	4	4	4	4	4	4	4	4	3	4	4	4	3	3	4	3	4	4	4	4	4	4	4	4	4	4	4	4	3	4	135	28	20	11	41	35
4	4	4	4	1	3	2	4	4	4	2	3	2	2	4	4	4	3	4	4	4	3	1	1	4	1	4	4	2	4	4	1	3	1	2	105	22	17	8	33	25
3	3	2	2	2	2	3	3	3	3	3	3	2	3	3	3	2	2	2	2	2	2	3	3	3	2	3	2	2	3	2	2	2	2	2	86	17	15	8	26	20
4	4	4	4	2	3	3	3	4	4	4	4	4	4	4	4	2	3	3	3	3	4	2	2	3	3	3	3	2	2	2	2	3	2	3	109	24	19	12	32	22
1	2	2	4	2	1	1	3	3	2	3	3	3	3	3	3	3	2	3	3	3	2	2	2	3	2	2	2	2	2	2	2	2	2	2	82	13	14	9	28	18
2	3	4	3	3	2	2	3	3	2	4	3	3	3	3	3	3	3	2	2	2	3	3	3	3	3	3	3	2	2	2	2	2	2	2	93	19	15	9	30	20
1	4	4	2	1	1	1	2	2	4	2	4	3	4	2	2	2	4	2	2	2	2	2	2	2	2	2	2	2	2	2	2	2	2	2	79	14	14	9	24	18
4	1	4	2	4	1	3	4	4	4	4	4	2	2	3	4	4	3	3	4	3	3	3	3	4	4	4	4	3	4	4	4	3	3	4	117	19	20	7	38	33
4	2	4	3	1	2	2	2	3	3	2	3	2	3	2	3	3	3	3	3	3	3	3	2	3	3	3	3	2	4	3	1	3	3	2	94	18	13	7	32	24
4	3	4	2	3	3	3	4	4	3	4	3	2	2	3	3	4	3	3	3	3	3	4	4	3	3	4	4	4	3	4	3	3	3	3	114	22	18	7	36	31
4	4	4	3	1	4	4	4	4	3	3	3	3	3	3	3	3	3	3	3	4	4	4	3	3	3	3	3	3	3	3	3	3	3	3	113	24	17	9	36	27
4	3	4	3	4	2	3	3	3	3	3	2	2	3	2	4	2	3	2	2	2	2	2	2	3	2	4	3	2	3	2	2	2	2	2	92	23	14	7	26	22
4	4	3	4	4	2	2	3	3	3	3	2	3	3	2	3	2	3	3	3	3	3	3	3	3	2	2	3	2	2	2	2	2	2	2	95	23	14	8	31	19
1	1	1	1	1	1	1	1	1	1	1	1	1	1	1	4	1	1	1	1	1	1	1	1	1	1	1	1	1	1	1	1	1	1	1	38	7	5	3	14	9
3	4	1	3	1	3	1	1	4	4	2	4	1	1	4	1	1	2	3	2	2	3	3	1	3	1	1	1	1	2	2	2	1	1	2	72	16	15	6	22	13
3	2	2	2	1	1	1	1	2	2	2	2	1	1	1	4	2	2	2	2	2	2	1	2	3	2	3	2	2	2	2	2	2	1	2	66	12	9	3	24	18
4	4	4	4	1	3	1	3	3	3	3	4	2	3	3	4	4	3	3	4	4	4	4	4	4	4	4	4	4	4	4	3	2	2	2	116	21	16	8	42	29
3	2	3	2	3	2	2	3	3	2	3	2	2	2	2	4	3	3	3	2	2	2	3	3	3	3	3	2	2	3	2	3	3	3	2	90	17	13	6	31	23
4	4	1	1	4	4	1	4	4	1	4	4	1	1	1	1	1	1	2	3	2	2	3	3	1	1	2	4	1	3	1	1	3	3	3	80	19	17	3	20	21
1	1	1	1	1	1	1	1	1	1	1	1	1	1	1	1	1	1	1	1	1	1	1	1	1	1	1	1	1	1	1	1	1	1	1	35	7	5	3	11	9
2	3	1	1	1	1	1	1	1	1	3	2	1	2	4	2	4	2	2	2	3	1	2	2	1	1	1	1	1	1	1	1	1	1	1	56	10	8	7	22	9
3	4	3	4	2	4	4	4	4	4	4	4	3	3	2	4	2	2	2	2	2	2	3	3	2	3	3	2	2	2	2	2	3	2	2	99	24	20	8	27	20
4	3	3	3	3	1	3	3	3	2	2	2	2	3	2	2	2	3	3	3	3	2	3	3	2	2	3	2	3	3	2	2	3	3	3	91	20	12	7	28	24
1	2	1	2	2	1	1	2	4	4	4	4	1	2	1	4	2	3	2	2	2	3	2	1	2	2	2	2	1	1	1	2	2	2	2	72	10	18	4	25	15
2	2	3	3	1	3	1	4	4	4	4	4	2	2	2	3	3	3	3	3	2	2	3	2	2	2	2	2	2	3	3	2	2	2	3	90	15	20	6	28	21
4	2	3	4	2	3	2	3	3	3	4	4	3	3	4	4	4	4	3	3	3	3	3	3	3	3	3	3	3	3	3	3	3	3	2	109	20	17	10	36	26
1	4	1	4	1	1	1	1	1	1	1	1	1	1	1	4	4	1	1	4	4	4	4	4	4	4	1	4	4	4	4	4	4	4	4	92	13	5	3	38	33
4	4	3	3	3	3	4	3	4	4	4	4	2	3	4	3	3	3	3	3	3	3	2	2	3	3	3	3	2	2	3	2	2	2	2	104	24	19	9	31	21
4	1	1	1	1	1	1	1	4	1	1	1	1	1	4	4	1	4	1	4	1	4	4	1	4	1	4	1	1	1	1	1	1	1	1	65	10	8	6	29	12
4	4	4	4	4	4	3	4	4	4	4	4	4	4	3	4	4	4	3	3	3	3	3	3	2	3	3	4	4	4	3	3	4	3	3	124	27	20	11	35	31
3	3	3	3	4	2	3	4	4	4	4	3	4	3	4	4	2	2	2	3	3	3	3	3	3	2	3	3	2	2	2	2	3	2	3	103	21	19	11	30	22
2	2	3	3	2	2	2	3	3	3	3	3	1	2	2	3	1	3	2	3	2	3	3	3	2	1	1	1	2	2	2	1	1	2	2	76	16	15	5	26	14
4	4	4	4	4	4	4	4	4	4	4	4	4	4	4	4	3	3	3	4	3	3	4	4	3	2	3	3	3	3	3	3	3	1	3	121	28	20	12	36	25
2	1	4	4	3	3	2	4	4	4	4	4	2	3	2	4	3	3	3	3	2	2	3	3	3	2	3	3	3	3	3	3	3	3	2	103	19	20	7	31	26
4	4	4	4	4	4	4	4	4	4	4	4	3	3	3	4	3	3	2	2	2	2	3	2	4	4	4	4	4	4	4	4	4	4	3	123	28	20	9	31	35
4	4	4	4	4	3	4	4	4	4	3	3	3	3	3	4	2	3	4	3	3	3	3	3	3	4	4	4	4	4	3	3	3	4	4	122	27	18	9	35	33
3	3	3	3	3	3	3	3	3	3	3	3	2	3	3	3	3	2	2	2	2	2	3	3	3	3	2	3	3	2	3	3	3	2	2	95	21	15	8	28	23
1	4	3	3	3	3	3	4	4	3	3	3	2	2	2	3	3	2	3	3	3	2	3	2	3	2	3	3	3	3	2	2	2	2	2	94	20	17	6	29	22
4	4	4	4	4	3	2	4	4	2	3	4	3	3	4	4	4	2	3	4	3	3	3	2	3	2	4	3	3	4	3	3	2	4	3	114	25	17	10	33	29
4	4	4	4	2	3	3	3	3	4	3	4	4	4	4	4	4	3	3	3	3	3	3	3	3	3	3	4	3	3	3	2	2	2	2	112	24	17	12	35	24
2	3	3	3	2	2	2	2	3	3	3	3	2	3	3	3	2	2	2	2	2	2	2	2	2	3	3	2	3	2	2	2	2	2	2	83	17	14	8	24	20
4	4	4	4	2	4	4	2	4	3	4	4	2	2	4	4	3	2	3	2	2	2	2	1	3	1	1	2	2	2	2	2	2	2	2	93	26	17	8	25	17
4	3	4	4	2	3	4	4	4	4	4	4	3	4	3	3	4	3	2	2	2	3	3	3	3	3	4	3	2	2	3	2	2	2	3	108	24	20	10	31	23
2	2	4	2	2	2	2	3	3	3	3	2	2	3	2	3	2	3	3	3	2	3	3	2	3	2	3	3	2	2	2	2	3	2	2	87	16	14	7	29	21
2	3	2	2	1	3	2	3	2	2	3	3	2	2	2	1	2	1	1	1	1	1	1	1	1	1	1	2	2	3	3	2	2	2	2	65	15	13	6	12	19
2	2	2	2	2	2	2	2	2	2	2	3	2	2	3	3	2	2	2	2	2	2	3	3	3	2	2	3	2	2	2	1	3	1	1	75	14	11	7	26	17
4	4	4	2	1	2	4	4	4	1	1	4	4	4	4	4	4	4	4	4	4	4	3	3	2	1	2	2	3	2	3	3	4	1	3	107	21	14	12	37	23
4	3	4	4	4	4	3	4	3	3	3	3	3	3	3	3	3	3	3	3	2	3	3	3	3	3	2	3	3	3	2	2	3	2	2	105	26	16	9	32	22
3	2	1	1	1	1	1	1	1	1	1	2	1	1	1	3	2	1	2	2	2	2	2	1	1	1	1	1	2	2	2	2	1	1	1	51	10	6	3	19	13
4	4	4	4	4	4	4	4	4	4	4	4	2	4	2	4	4	2	2	2	3	3	3	3	2	1	3	3	3	4	1	3	4	4	1	111	28	20	8	29	26
4	4	3	2	2	2	2	4	4	3	3	4	3	4	4	4	4	4	3	4	4	3	3	4	4	4	4	3	4	3	4	4	4	4	4	123	19	18	11	41	34
1	1	1	1	1	1	3	3	3	3	3	3	2	3	3	3	3	2	3	3	3	3	2	2	2	2	2	2	3	2	2	2	3	2	2	80	9	15	8	28	20
4	4	1	1	3	3	3	3	3	3	3	3	2	1	2	3	1	1	2	2	2	2	3	2	3	2	3	3	2	2	2	2	2	2	2	82	19	15	5	23	20
4	4	3	2	3	4	4	4	4	4	4	4	2	4	2	3	2	3	4	4	4	4	2	3	4	2	4	4	3	4	4	4	4	2	2	118	24	20	8	35	31
3	2	3	3	1	2	3	3	3	2	3	3	3	3	3	3	2	2	3	3	2	2	2	2	2	2	2	2	2	3	2	2	2	2	2	84	17	14	9	25	19
3	3	3	3	2	3	2	3	3	3	3	3	2	2	3	3	3	2	3	3	3	3	3	3	3	2	3	3	2	2	3	2	2	2	2	93	19	15	7	31	21
4	4	4	4	4	4	4	4	4	4	4	4	1	4	4	4	4	4	4	4	4	4	4	4	4	1	4	4	4	1	4	4	4	1	1	125	28	20	9	41	27
4	4	4	4	4	3	3	4	4	4	4	4	3	4	4	4	3	2	3	2	3	2	2	2	3	3	3	3	4	3	3	3	3	3	3	114	26	20	11	29	28
4	4	4	4	1	4	3	3	3	4	4	4	2	3	2	3	4	2	3	3	3	2	2	2	2	2	4	4	4	3	3	3	3	3	2	106	24	18	7	28	29
3	3	4	3	1	3	4	4	4	3	3	4	2	2	2	2	2	2	2	2	2	2	2	1	4	1	3	4	2	2	2	1	3	1	2	87	21	18	6	22	20
1	1	1	1	3	1	2	3	2	2	2	2	1	2	2	3	2	3	2	2	2	2	2	3	3	3	3	3	2	2	2	2	2	2	2	73	10	11	5	27	20
3	4	3	3	3	3	3	3	3	3	3	3	3	3	3	3	3	3	2	3	3	3	2	2	3	3	3	4	4	3	3	2	3	3	2	103	22	15	9	30	27
3	2	2	2	2	2	2	3	3	2	2	3	2	2	2	3	2	3	3	3	3	3	2	2	3	2	2	2	3	3	2	2	3	2	2	84	15	13	6	29	21
4	4	4	4	1	1	4	4	4	4	4	4	4	4	4	4	4	4	4	4	4	4	4	4	4	4	4	4	4	4	4	4	4	4	4	134	22	20	12	44	36
3	3	3	2	2	2	2	4	4	2	4	4	3	2	2	4	3	3	3	3	3	3	2	2	2	3	3	4	3	3	2	3	3	2	2	98	17	18	7	31	25
1	1	1	1	1	1	1	4	4	3	3	4	1	4	4	4	4	3	4	4	3	3	2	2	3	1	4	4	1	1	1	1	1	1	1	82	7	18	9	33	15
1	4	4	4	1	1	1	4	4	1	4	1	1	4	4	4	4	3	4	4	3	4	2	2	3	1	4	4	4	1	1	1	1	1	1	91	16	14	9	34	18
2	2	2	2	3	1	2	2	2	2	2	2	3	3	1	2	2	2	2	2	2	2	2	3	2	2	3	3	2	2	2	2	2	2	2	74	14	10	7	23	20
3	2	3	2	2	2	2	3	3	2	3	1	2	2	2	3	3	2	2	2	2	2	2	2	2	3	3	2	2	2	2	2	2	2	2	78	16	12	6	25	19
4	4	4	4	4	4	4	4	4	4	4	4	4	3	4	4	3	3	3	3	3	3	4	4	4	4	3	4	4	3	3	3	3	3	3	126	28	20	11	38	29
2	2	2	2	3	3	1	3	3	2	3	2	2	2	2	3	2	3	2	2	2	2	2	2	3	2	2	2	2	2	2	2	2	2	2	77	15	13	6	25	18
4	3	4	3	3	2	3	3	4	3	2	3	2	2	2	3	3	3	3	3	2	2	2	2	3	2	3	3	2	2	2	2	2	2	2	91	22	15	6	28	20
4	4	3	4	4	1	1	4	3	3	4	4	3	2	4	4	4	4	4	4	4	4	1	1	2	4	3	2	1	2	2	1	2	3	2	102	21	18	9	36	18
2	3	4	4	4	3	3	4	4	3	3	4	2	2	3	4	4	3	3	3	3	3	3	3	3	2	3	3	3	3	2	3	3	3	3	108	23	18	7	34	26
4	3	3	4	3	3	3	4	4	4	4	4	2	3	3	4	4	3	3	4	4	3	2	3	3	2	3	3	3	4	3	2	2	2	3	111	23	20	8	35	25
2	2	2	2	1	1	1	2	1	1	2	1	1	1	1	2	2	4	4	4	4	4	4	4	4	4	1	1	1	1	1	1	1	1	1	70	11	7	3	40	9
3	3	3	3	3	3	2	3	3	3	3	3	3	3	3	3	3	3	3	2	3	3	2	2	3	3	3	4	4	3	2	3	2	2	2	99	20	15	9	30	25
4	4	4	4	4	4	4	4	4	4	4	4	4	4	4	4	4	4	4	4	4	4	4	4	4	4	4	4	4	4	4	1	4	1	1	131	28	20	12	44	27
4	4	4	3	3	2	3	3	4	3	3	3	3	3	2	3	3	3	3	3	3	3	3	3	2	3	3	3	3	3	3	2	3	2	3	104	23	16	8	32	25
4	4	4	4	3	2	3	3	4	2	3	3	3	2	3	3	4	3	3	4	3	3	3	3	3	2	3	4	3	3	3	3	3	2	2	107	24	15	8	34	26
4	2	4	2	2	1	4	3	2	1	2	2	1	4	4	2	2	2	2	2	2	3	2	2	4	4	4	4	2	4	3	2	2	2	2	90	19	10	9	27	25
3	2	2	2	2	2	2	2	2	2	2	2	2	2	2	3	3	2	2	2	2	2	3	3	3	2	2	2	2	2	2	2	2	2	2	76	15	10	6	27	18
3	3	3	3	1	3	3	3	3	2	3	3	2	3	3	3	3	2	3	3	3	3	3	3	3	3	3	3	2	3	3	3	3	3	3	99	19	14	8	32	26
4	4	4	4	4	4	4	4	4	4	4	4	4	4	4	4	4	4	4	4	4	4	4	4	4	3	4	4	2	4	3	2	2	2	3	129	28	20	12	43	26
3	1	2	1	1	1	1	1	2	2	1	1	2	2	2	1	1	1	2	2	2	2	1	1	1	1	1	2	1	2	1	1	1	1	1	49	10	7	6	15	11
3	3	3	3	3	3	3	4	4	4	4	4	2	2	2	4	4	4	3	3	2	3	3	3	3	3	4	3	2	3	2	2	2	2	2	104	21	20	6	35	22
2	2	1	2	1	1	1	1	1	1	3	2	2	2	2	2	2	1	1	1	2	2	1	2	3	3	3	3	3	4	3	2	2	2	2	68	10	8	6	20	24
4	4	4	4	4	4	4	4	4	4	4	4	4	4	1	4	4	4	4	4	4	4	4	4	1	4	4	4	4	4	4	4	4	4	4	134	28	20	9	41	36
4	3	3	3	2	2	3	3	3	3	3	3	4	2	3	2	4	3	3	3	2	2	2	2	3	3	3	2	2	2	2	2	2	2	2	92	20	15	9	29	19
3	3	2	3	3	1	1	3	2	2	2	3	2	2	2	3	2	2	2	3	2	2	2	1	2	1	1	2	2	3	2	1	1	1	2	71	16	12	6	22	15
1	2	2	2	4	4	1	3	3	2	3	3	1	2	2	3	2	2	2	2	2	2	2	2	2	2	2	2	2	2	1	1	1	2	1	72	16	14	5	23	14
4	3	3	4	4	3	3	4	4	4	3	3	4	4	3	3	3	3	3	3	3	3	3	3	3	2	3	3	3	3	3	3	3	3	3	112	24	18	11	32	27
4	3	4	3	3	2	3	3	3	4	4	4	3	3	2	4	2	2	2	2	2	2	2	2	3	2	3	2	2	2	2	2	2	2	2	92	22	18	8	25	19
3	2	3	3	2	2	2	3	4	3	3	3	2	2	2	4	3	3	2	2	2	2	2	2	2	2	3	3	3	3	3	3	3	3	2	91	17	16	6	26	26
3	2	2	2	1	2	2	3	3	2	3	2	1	1	1	3	2	2	2	2	2	2	2	2	3	2	2	1	1	2	2	1	1	1	2	67	14	13	3	24	13
3	3	3	3	2	2	2	3	3	3	3	4	2	3	2	3	2	2	2	3	3	2	2	3	2	2	3	3	2	2	3	3	3	3	2	91	18	16	7	26	24
1	2	2	2	1	2	1	1	2	1	1	2	1	1	2	2	2	1	1	2	2	2	2	1	3	1	2	2	2	2	2	1	2	2	2	58	11	7	4	19	17
3	1	2	1	1	4	1	3	4	3	3	3	1	2	4	3	3	2	2	3	3	3	2	2	3	3	2	2	2	3	2	3	3	2	2	86	13	16	7	29	21
3	2	2	2	1	2	3	3	3	3	3	3	2	3	2	3	3	2	2	3	2	3	3	3	3	2	3	2	2	2	2	2	2	2	3	86	15	15	7	29	20
1	1	2	2	1	1	2	2	3	3	3	3	2	2	3	3	3	2	2	2	2	3	2	2	3	3	3	2	2	2	2	2	2	2	2	77	10	14	7	27	19
2	2	2	2	2	2	2	3	3	3	3	3	2	2	1	2	2	2	2	2	2	2	2	2	2	2	2	2	2	2	2	2	2	2	2	74	14	15	5	22	18
3	3	3	3	3	3	3	3	3	3	3	3	3	3	3	3	3	3	3	3	3	3	3	3	3	3	3	3	3	3	3	3	3	3	3	105	21	15	9	33	27
1	2	1	2	3	1	2	3	1	3	3	3	2	2	3	3	3	3	3	3	3	3	3	3	3	3	3	3	3	1	2	2	3	2	3	87	12	13	7	33	22
2	2	2	1	1	1	1	2	2	2	1	2	1	1	2	2	2	2	2	2	2	2	2	2	2	1	2	2	2	2	2	1	1	1	1	58	10	9	4	21	14
3	3	3	2	1	1	1	4	4	3	4	4	3	2	3	4	2	2	3	3	2	4	3	3	4	1	4	2	2	2	2	2	2	2	1	91	14	19	8	31	19
3	3	3	3	3	4	4	3	3	4	4	4	4	3	4	4	4	4	4	4	4	4	4	3	3	4	4	4	4	3	4	4	4	4	3	128	23	18	11	42	34
4	3	4	4	1	1	2	4	4	4	4	4	2	4	2	4	4	2	4	4	4	4	4	4	4	4	4	4	4	4	4	3	4	4	4	124	19	20	8	42	35
3	3	3	3	3	3	2	3	3	3	3	3	2	3	2	3	3	3	3	2	2	2	2	2	3	2	2	3	2	2	2	2	3	2	3	90	20	15	7	27	21
2	2	1	1	1	1	1	2	2	2	2	2	1	1	1	1	2	2	2	2	1	2	1	1	1	1	1	1	1	1	1	1	1	1	1	47	9	10	3	16	9
4	4	4	1	1	4	1	4	4	4	4	4	1	4	2	4	4	4	3	4	3	3	4	3	4	3	4	4	4	2	2	2	2	2	2	109	19	20	7	39	24
1	1	1	1	3	2	2	4	2	4	4	4	1	2	2	3	1	2	2	2	2	2	2	2	2	2	2	2	1	1	1	1	1	1	2	68	11	18	5	22	12
2	1	2	2	1	1	1	2	2	2	3	3	2	2	2	3	4	2	2	3	2	2	3	3	3	2	2	2	2	3	1	1	1	1	1	71	10	12	6	29	14
4	4	4	4	1	1	2	1	4	4	2	2	2	2	4	4	4	2	3	3	3	3	2	3	1	2	2	2	3	2	2	1	3	2	2	90	20	13	8	30	19
1	4	1	4	1	1	1	4	4	4	4	1	1	4	4	4	4	1	4	4	1	4	4	4	4	4	1	4	1	1	1	4	1	1	1	92	13	17	9	38	15
2	1	2	1	2	2	1	4	3	2	4	3	2	2	2	4	2	4	2	4	3	2	2	2	3	3	3	3	3	2	2	1	2	2	2	84	11	16	6	31	20
1	1	1	1	1	1	1	1	1	1	1	1	1	1	1	3	3	3	3	3	3	3	2	2	3	2	1	1	1	1	1	1	2	2	2	57	7	5	3	30	12
2	3	2	2	2	2	2	2	3	3	3	3	2	3	2	3	2	2	2	2	2	2	3	2	2	2	2	2	2	2	2	2	2	2	2	78	15	14	7	24	18
1	1	1	1	1	1	1	4	1	1	1	1	1	1	1	1	2	2	3	4	2	2	4	2	4	2	2	2	2	2	2	2	2	2	2	64	7	8	3	28	18
4	4	4	1	1	1	1	4	4	1	1	4	1	4	1	4	1	1	1	4	1	1	1	1	1	1	4	1	1	4	1	1	1	1	1	68	16	14	6	17	15
3	3	3	3	3	2	2	3	3	2	3	2	2	2	2	2	3	3	3	3	3	3	2	2	3	3	3	3	2	3	3	2	2	2	3	91	19	13	6	30	23
2	2	3	3	3	2	1	2	2	2	2	2	2	2	2	3	2	2	2	2	2	2	3	3	3	2	2	2	2	2	2	2	2	2	1	75	16	10	6	26	17
2	3	3	2	3	3	2	2	3	3	3	3	2	2	2	3	3	3	2	3	3	3	3	3	3	2	2	3	3	3	2	2	3	3	3	93	18	14	6	31	24
4	3	3	3	3	1	2	4	4	3	3	3	3	3	4	4	4	3	3	3	3	3	3	2	2	2	3	3	3	4	4	3	3	3	3	107	19	17	10	32	29
4	2	2	2	2	3	3	3	3	3	3	2	3	2	3	3	3	2	3	3	3	3	3	3	2	3	3	2	2	3	3	2	3	3	2	94	18	14	8	31	23
4	2	3	3	4	2	2	4	4	4	4	4	2	2	4	4	4	4	3	3	3	3	2	3	4	4	4	4	4	4	4	4	2	3	3	117	20	20	8	37	32
3	2	2	2	4	3	3	4	4	4	4	4	2	3	4	4	4	2	2	3	2	3	3	3	4	3	3	4	3	3	3	3	3	3	3	109	19	20	9	33	28
3	1	3	2	1	1	1	3	3	2	2	3	3	1	2	4	3	2	2	2	2	2	1	1	3	1	2	2	2	2	2	2	2	1	1	70	12	13	6	23	16
2	4	4	4	4	2	3	3	3	4	3	4	2	2	1	3	4	2	2	3	3	3	3	2	2	2	2	1	2	3	2	1	2	2	2	91	23	17	5	29	17
4	3	3	2	2	2	1	4	3	4	3	4	4	2	4	4	4	4	4	4	4	3	2	3	3	2	2	3	4	2	2	3	2	2	2	104	17	18	10	37	22
1	3	1	1	1	1	1	2	1	2	2	2	1	2	1	1	2	2	2	2	2	2	1	1	1	1	1	2	2	2	1	1	1	1	1	51	9	9	4	17	12
3	2	3	2	4	1	1	4	4	2	4	4	2	2	3	3	2	2	2	2	2	3	3	3	3	2	2	2	3	3	3	3	3	3	3	93	16	18	7	27	25
4	4	4	4	4	4	4	4	4	4	4	4	4	4	4	4	4	4	4	4	4	4	4	4	4	4	4	4	4	4	4	4	4	4	4	140	28	20	12	44	36
4	3	4	2	2	2	2	4	3	3	4	4	4	4	4	4	4	2	3	3	2	2	3	3	3	2	1	3	3	3	2	2	2	2	1	99	19	18	12	31	19
3	4	4	2	3	3	2	4	4	4	4	4	4	4	4	4	3	2	3	3	2	4	3	2	3	3	2	3	3	3	2	2	2	2	2	106	21	20	12	32	21
3	3	3	2	2	2	2	3	3	3	2	3	2	2	2	4	4	3	3	3	3	2	2	2	3	3	2	2	2	2	2	2	2	2	2	87	17	14	6	32	18
1	4	1	1	1	1	1	4	4	4	4	4	1	1	1	4	2	2	2	2	2	2	2	2	2	2	2	3	2	2	3	2	3	3	3	80	10	20	3	24	23
2	1	1	1	1	1	1	1	3	3	3	3	1	1	1	3	1	1	1	2	1	1	1	1	1	1	1	1	1	1	1	1	1	1	1	47	8	13	3	14	9
4	4	3	4	2	1	3	3	3	3	3	3	2	3	2	3	3	3	3	3	3	3	3	3	3	2	3	2	2	2	2	2	2	2	2	94	21	15	7	32	19
4	4	4	4	4	1	1	4	4	4	4	4	1	4	4	4	4	4	4	3	2	2	4	4	4	3	3	4	4	4	2	3	3	2	2	116	22	20	9	38	27
3	3	3	3	2	2	1	4	3	3	2	2	2	1	2	3	1	2	3	3	2	1	2	2	2	1	2	3	2	2	2	2	3	1	1	76	17	14	5	22	18
4	4	4	4	3	2	3	4	3	2	3	3	2	3	2	4	4	3	3	3	4	3	3	2	3	1	3	3	3	3	3	2	2	2	1	101	24	15	7	33	22
3	4	3	3	3	3	3	4	4	4	4	3	2	3	3	3	4	3	3	3	3	4	3	2	3	2	3	3	3	2	3	2	3	3	2	106	22	19	8	33	24
2	3	3	3	1	3	2	4	3	2	2	3	2	2	3	4	3	2	3	3	2	2	3	2	3	2	3	3	2	2	2	2	2	2	2	87	17	14	7	29	20
4	4	4	4	1	1	1	4	4	4	4	4	4	4	2	4	2	2	2	2	3	1	2	3	3	3	3	3	3	3	3	3	3	3	3	103	19	20	10	27	27
2	2	3	3	3	2	2	3	3	3	3	4	2	3	3	4	2	3	3	3	3	3	3	3	3	2	3	2	2	3	3	2	2	2	2	94	17	16	8	32	21
4	4	2	2	2	4	3	4	3	3	4	4	2	2	4	4	4	4	4	4	4	4	4	2	4	4	2	3	3	2	2	2	2	2	2	109	21	18	8	42	20
4	4	4	2	1	1	2	2	3	4	3	3	3	1	2	3	3	3	3	3	3	3	3	3	3	2	3	3	3	3	2	2	3	2	2	94	18	15	6	32	23
3	2	2	2	2	2	2	2	2	2	2	3	3	1	2	3	3	2	2	3	2	3	2	2	4	1	3	2	2	2	2	1	2	2	2	77	15	11	6	27	18
4	4	4	4	4	1	1	3	4	4	4	4	1	4	2	4	4	2	2	3	3	2	3	2	2	2	2	3	4	2	2	2	2	2	2	98	22	19	7	29	21
3	3	3	3	3	3	3	3	3	3	3	3	3	2	2	3	3	2	3	3	3	2	2	2	3	3	2	3	2	2	2	2	2	2	2	91	21	15	7	29	19
4	2	4	2	2	1	1	4	4	4	3	4	4	3	2	4	4	3	3	3	3	3	3	2	4	2	2	3	3	4	3	2	3	3	2	103	16	19	9	34	25
3	3	3	4	4	2	2	4	4	4	4	4	2	4	2	4	2	3	2	2	2	2	3	3	3	3	3	3	3	3	2	3	3	2	3	103	21	20	8	29	25
4	4	4	4	4	4	4	4	4	4	4	4	4	4	4	4	4	4	4	4	4	4	4	4	4	4	4	4	4	4	4	4	4	4	4	140	28	20	12	44	36
1	1	1	1	1	1	1	2	2	2	2	2	1	2	1	3	1	2	3	2	2	3	3	1	3	1	1	1	1	3	1	1	1	1	1	56	7	10	4	24	11
4	4	4	4	4	4	4	4	4	2	3	4	4	4	4	4	4	2	4	4	4	4	4	2	3	3	4	4	4	4	4	4	4	4	4	131	28	17	12	38	36
2	4	2	1	1	1	1	2	4	4	2	2	1	4	1	1	2	3	3	3	3	3	3	1	4	1	1	1	1	2	1	1	1	1	1	69	12	14	6	27	10
3	3	3	3	3	3	3	3	3	3	3	3	3	3	3	3	3	3	3	3	3	3	3	3	3	3	3	3	3	3	3	3	3	3	3	105	21	15	9	33	27
4	4	4	4	4	4	4	4	4	1	4	4	3	4	4	4	4	4	4	4	4	4	4	4	4	4	4	4	4	4	4	4	1	1	1	127	28	17	11	44	27
3	2	2	2	2	2	2	3	3	3	3	3	2	3	4	4	4	3	3	3	3	3	3	3	3	2	3	3	2	2	3	2	3	2	2	95	15	15	9	34	22
1	1	1	1	1	1	1	2	3	3	4	4	1	1	1	2	2	2	2	2	2	2	1	1	2	2	2	1	1	1	1	1	1	1	1	56	7	16	3	20	10
3	3	2	2	2	2	3	2	3	3	3	3	3	3	3	3	2	3	2	2	2	2	3	3	3	2	3	3	3	3	3	3	3	2	3	93	17	14	9	27	26
2	1	2	2	1	1	1	1	1	1	1	1	1	1	1	3	2	2	4	4	3	3	1	2	3	3	3	3	2	2	1	1	2	1	1	64	10	5	3	30	16
3	2	3	2	1	2	2	3	3	3	2	2	3	3	3	3	3	2	3	3	3	3	3	2	3	3	3	2	3	3	2	2	2	2	2	89	15	13	9	31	21
4	3	3	3	1	1	1	2	2	2	3	3	1	1	1	2	1	1	1	1	1	1	3	3	2	1	3	2	2	2	2	1	1	1	1	63	16	12	3	17	15
4	4	4	4	3	3	2	4	4	2	2	2	4	4	4	4	4	3	4	4	4	4	3	3	3	2	3	3	3	3	3	3	3	3	3	115	24	14	12	38	27
1	4	1	1	1	1	1	1	1	1	1	1	1	1	1	4	1	1	1	1	1	1	1	1	1	1	1	1	1	1	1	1	1	1	1	41	10	5	3	14	9
3	2	3	3	3	2	2	4	4	3	4	4	3	4	4	4	3	3	4	4	4	4	4	4	4	4	4	4	4	4	4	2	4	4	2	122	18	19	11	42	32
4	4	4	4	4	4	1	4	4	4	4	4	4	4	4	4	4	3	3	4	3	3	3	3	4	3	4	4	3	4	3	3	3	3	3	124	25	20	12	37	30
3	4	3	4	4	3	3	4	4	4	4	4	4	4	4	4	4	2	3	3	3	3	3	3	3	2	3	3	3	3	3	3	2	2	2	113	24	20	12	33	24
2	1	1	1	1	1	1	4	3	3	4	3	2	3	2	3	2	2	2	2	2	2	1	1	3	3	1	2	2	2	1	2	1	1	1	68	8	17	7	23	13
4	4	4	3	4	3	3	3	4	3	4	4	4	4	4	4	3	3	3	3	4	3	3	3	3	4	3	3	2	4	3	2	3	3	3	117	25	18	12	36	26
1	1	1	1	1	1	1	2	1	1	1	1	1	1	1	1	1	1	1	1	1	1	1	1	4	1	1	1	1	1	1	1	1	1	1	39	7	6	3	14	9
4	2	3	1	2	2	2	3	3	3	3	3	2	2	3	4	4	2	4	4	3	3	3	3	4	2	4	3	2	3	2	2	2	3	2	97	16	15	7	36	23
4	4	4	4	2	1	4	4	4	4	4	4	4	2	4	4	4	4	4	4	4	4	4	4	4	2	4	4	4	4	4	1	4	1	4	125	23	20	10	42	30
3	2	2	1	2	1	2	3	2	2	3	4	2	2	1	3	2	1	2	2	2	2	2	2	3	1	2	2	2	2	2	2	2	2	2	72	13	14	5	22	18
3	2	2	1	1	1	1	3	2	2	3	1	2	2	1	3	2	1	2	2	2	2	2	2	3	1	2	2	2	2	2	2	2	2	2	67	11	11	5	22	18
1	1	1	1	1	1	1	1	2	1	1	1	1	1	1	1	1	3	1	1	1	2	1	1	2	1	1	1	1	1	1	1	1	1	1	40	7	6	3	15	9
2	2	2	2	2	2	2	2	3	3	3	3	3	3	3	4	3	3	3	3	3	3	3	2	3	3	3	2	2	3	2	2	2	2	2	90	14	14	9	33	20
3	2	3	1	4	2	3	3	1	2	3	2	3	3	3	3	2	3	3	3	3	3	2	2	3	2	3	3	3	3	3	3	2	2	2	91	18	11	9	29	24
4	4	2	1	4	1	1	3	4	4	4	4	4	4	4	4	4	4	4	4	4	3	3	3	2	4	3	3	3	3	2	1	2	2	1	107	17	19	12	39	20
3	4	3	3	1	1	1	3	3	3	2	4	2	2	2	3	2	2	4	4	4	3	3	2	3	4	3	2	3	3	2	2	3	3	2	94	16	15	6	34	23
4	3	2	2	2	3	1	3	3	1	4	4	4	4	4	3	2	2	3	4	4	3	2	2	2	2	4	4	4	3	2	2	2	1	2	97	17	15	12	29	24
2	3	3	2	1	2	2	3	3	3	3	3	3	2	3	3	3	3	3	3	3	3	3	2	3	2	2	2	2	2	2	2	2	2	2	87	15	15	8	31	18
1	1	1	1	4	1	1	1	1	1	1	1	1	1	1	1	1	1	1	2	1	1	1	1	1	1	1	1	1	1	1	1	1	1	1	39	10	5	3	12	9
1	1	1	1	1	1	1	4	4	4	4	4	1	1	4	4	1	1	4	4	4	4	1	1	1	1	1	1	1	4	1	1	4	1	1	74	7	20	6	26	15
2	3	2	3	2	2	2	3	3	2	3	3	2	2	2	3	2	2	3	3	3	3	3	2	3	1	3	3	3	3	2	3	3	3	3	90	16	14	6	28	26
4	1	3	3	1	4	2	4	4	4	4	4	2	3	4	4	4	3	2	2	2	2	3	1	3	3	3	2	2	2	1	1	2	1	1	91	18	20	9	29	15
4	2	4	2	4	2	2	4	4	2	4	4	4	2	4	4	4	2	2	4	2	4	4	4	4	1	1	4	2	2	2	1	1	1	1	98	20	18	10	35	15
1	1	1	1	1	1	1	1	2	2	2	2	1	1	1	4	1	3	2	2	1	2	1	1	3	3	1	1	1	1	1	1	1	1	1	51	7	9	3	23	9
4	3	3	3	3	3	2	3	3	3	3	3	3	2	3	3	3	3	3	3	3	3	2	2	3	3	3	3	2	3	2	2	2	2	2	96	21	15	8	31	21
3	3	2	3	2	1	2	2	3	4	4	3	2	2	3	4	3	2	3	3	3	2	2	2	3	1	4	3	2	2	3	2	2	1	1	87	16	16	7	28	20
4	4	3	3	2	3	3	3	4	4	4	4	4	3	4	4	4	3	4	4	4	4	3	3	3	1	4	4	4	3	3	2	2	2	2	115	22	19	11	37	26
3	2	3	2	2	2	2	3	2	2	2	2	2	2	3	3	3	3	2	3	3	3	2	2	3	2	2	2	2	2	2	2	2	2	2	81	16	11	7	29	18
3	3	3	3	1	3	1	3	3	3	3	3	2	3	3	3	3	3	3	3	3	3	3	3	3	1	3	3	3	1	3	3	3	3	3	96	17	15	8	31	25
3	1	2	2	2	2	2	3	3	3	3	3	2	3	2	3	3	3	3	3	2	3	3	2	3	2	2	2	2	3	2	2	2	2	2	85	14	15	7	30	19
3	2	2	2	2	2	2	3	2	2	2	3	3	2	3	3	4	3	3	3	3	3	3	3	3	1	3	2	2	2	2	2	2	2	2	86	15	12	8	32	19
3	2	2	2	2	2	3	3	2	3	3	3	2	2	2	3	2	2	2	2	2	2	3	2	3	2	2	2	2	2	2	2	2	2	2	79	16	14	6	25	18
3	1	3	1	1	1	1	3	2	3	1	4	3	1	4	4	4	2	2	4	2	4	1	1	4	1	4	4	3	3	1	1	1	1	1	80	11	13	8	29	19
3	2	2	2	2	2	2	3	3	3	3	3	3	2	3	3	3	3	2	3	2	3	2	2	3	2	2	2	2	2	2	2	2	2	2	84	15	15	8	28	18
4	3	3	3	3	2	2	3	2	3	3	3	3	3	2	3	3	3	3	3	3	3	2	2	3	2	3	2	2	3	2	2	3	2	2	93	20	14	8	30	21
1	1	1	1	1	1	1	4	1	3	3	4	1	3	3	3	3	2	2	4	2	2	2	3	3	1	2	1	1	2	2	1	2	2	1	70	7	15	7	27	14
3	3	3	3	3	2	3	3	4	3	4	3	3	2	3	2	2	1	3	3	3	3	3	3	3	1	2	2	2	2	2	2	2	2	2	90	20	17	8	27	18
2	1	2	2	1	2	2	2	4	3	3	3	2	1	2	3	3	2	2	3	2	3	2	1	2	2	3	3	2	3	2	2	2	3	2	79	12	15	5	25	22
1	1	1	1	1	1	1	1	1	1	1	1	1	1	1	1	1	1	1	2	2	2	1	1	1	1	1	2	2	2	2	2	1	1	1	43	7	5	3	14	14
3	2	3	3	1	2	3	3	3	3	3	2	2	3	2	3	3	2	2	3	2	2	4	4	2	1	3	2	1	2	1	1	2	2	4	84	17	14	7	28	18
1	1	1	1	1	1	1	1	1	1	1	3	1	1	1	3	1	1	1	1	1	1	4	1	4	1	1	1	1	1	1	1	1	1	1	45	7	7	3	19	9
3	3	3	3	2	2	2	3	3	2	4	2	3	2	2	3	2	3	2	3	3	4	2	2	3	2	3	2	2	2	2	2	3	2	2	88	18	14	7	29	20
2	3	3	1	1	4	1	4	3	3	3	3	2	2	1	3	3	3	2	2	1	1	2	2	2	1	2	2	2	2	2	2	2	2	2	76	15	16	5	22	18
1	1	4	3	2	2	1	2	3	2	3	2	2	2	3	2	3	2	3	3	3	2	3	2	3	2	3	2	3	3	2	2	2	2	2	82	14	12	7	28	21
4	3	3	3	4	3	3	3	4	3	3	3	4	3	3	4	3	3	3	3	3	3	3	3	3	4	3	3	3	3	3	3	3	3	3	111	23	16	10	35	27
4	4	4	4	4	2	2	4	3	4	4	4	2	3	2	4	4	3	3	4	3	3	4	4	3	2	4	4	4	2	3	3	3	2	3	115	24	19	7	37	28
3	2	2	2	3	2	2	2	2	3	3	3	2	3	2	3	2	2	2	2	2	2	3	3	3	2	3	2	2	3	3	2	3	2	2	84	16	13	7	26	22
3	2	3	3	3	1	2	3	3	3	3	3	2	2	3	3	2	2	3	3	3	3	2	2	2	3	3	3	2	2	3	2	3	2	2	89	17	15	7	28	22
2	2	2	2	2	2	2	3	3	3	3	3	2	2	2	3	2	3	2	3	2	2	3	2	2	3	3	3	3	3	2	3	3	3	3	88	14	15	6	27	26
4	4	3	4	4	4	4	4	4	4	4	4	3	4	4	4	3	4	4	4	3	3	4	4	4	2	4	4	4	4	4	3	4	3	4	131	27	20	11	39	34
3	3	3	3	3	3	2	2	3	3	3	3	2	2	2	3	2	2	2	2	2	2	2	3	2	2	2	2	2	2	3	2	2	2	2	83	20	14	6	24	19
2	2	2	2	2	2	2	2	2	2	2	2	2	2	2	2	2	2	2	2	2	2	2	2	2	2	2	2	2	2	2	2	2	2	2	70	14	10	6	22	18
4	4	4	4	1	1	2	2	2	4	2	2	2	3	2	3	3	2	2	3	3	3	2	2	3	2	3	3	3	3	2	3	3	3	3	93	20	12	7	28	26
4	3	4	4	3	4	4	4	4	3	3	3	3	2	3	4	4	3	2	2	2	2	3	4	4	2	4	4	4	4	2	2	2	3	2	110	26	17	8	32	27
4	4	4	4	4	4	4	4	4	3	4	4	4	3	3	4	2	3	4	4	3	2	4	4	3	3	4	4	2	2	4	2	3	1	2	117	28	19	10	36	24
3	2	3	2	3	2	2	3	3	2	3	2	2	2	1	2	2	2	2	2	2	2	3	2	2	2	2	2	2	2	2	2	2	2	2	76	17	13	5	23	18
4	4	4	1	4	1	1	4	1	4	4	1	1	4	1	4	4	1	4	4	4	4	4	4	4	1	1	1	1	4	1	1	4	1	4	95	19	14	6	38	18
1	1	1	1	1	1	1	1	1	1	1	1	1	1	1	1	1	1	1	1	1	1	1	1	1	1	1	1	1	1	1	1	1	1	1	35	7	5	3	11	9
2	2	4	2	2	2	2	4	4	2	2	2	2	2	3	3	3	3	3	3	3	3	2	2	2	2	3	3	2	3	2	2	2	2	2	87	16	14	7	29	21
4	4	4	4	4	4	4	4	4	4	4	4	4	4	4	4	4	4	4	4	4	4	4	4	4	4	4	4	4	4	4	4	4	4	4	140	28	20	12	44	36
1	2	2	2	2	2	2	3	2	3	2	2	2	2	2	3	2	2	2	2	2	2	3	3	3	2	2	2	1	1	1	1	1	1	1	68	13	12	6	26	11
3	3	3	2	4	3	3	4	4	3	4	3	3	4	3	4	2	3	3	3	3	3	4	3	3	3	3	2	3	3	3	3	2	3	2	107	21	18	10	34	24
3	3	3	2	3	3	2	3	3	3	2	2	2	3	3	3	2	3	2	3	2	2	3	3	3	2	3	2	2	2	3	2	2	2	2	88	19	13	8	28	20
1	4	4	4	4	1	1	4	4	4	4	4	4	4	4	4	4	1	1	4	1	1	4	4	4	1	4	4	4	1	1	1	1	1	4	101	19	20	12	29	21
4	4	4	4	1	1	4	4	4	4	4	4	4	4	4	4	4	2	1	1	1	1	1	1	1	1	1	1	1	1	1	1	1	1	1	81	22	20	12	18	9
1	1	1	1	1	1	1	1	1	1	1	1	1	1	1	1	1	1	1	1	1	1	1	1	1	1	1	1	1	1	1	1	1	1	1	35	7	5	3	11	9
4	4	4	4	3	3	2	3	4	3	2	3	3	3	4	2	2	2	3	3	2	2	2	2	2	3	2	2	2	2	2	2	2	2	2	92	24	15	10	25	18
4	4	4	3	1	4	2	4	4	4	4	4	3	4	4	4	3	3	2	3	2	2	3	2	2	2	4	4	4	4	3	3	2	2	3	110	22	20	11	28	29
3	2	3	2	2	2	2	2	2	2	2	2	2	2	2	3	3	2	2	2	2	3	3	2	3	2	3	2	2	3	2	2	2	2	2	79	16	10	6	27	20
3	2	2	3	1	1	2	1	3	3	3	2	2	3	4	2	4	2	3	3	2	2	2	2	3	2	4	4	3	4	3	2	2	3	3	90	14	12	9	27	28
1	1	1	1	1	1	1	1	4	1	4	4	3	3	3	3	3	2	2	3	3	3	3	3	3	3	3	3	2	4	3	2	2	2	2	84	7	14	9	31	23
4	4	4	4	4	3	4	4	4	4	4	4	4	4	4	4	4	4	4	4	4	4	3	3	4	4	4	4	4	4	4	4	4	3	3	135	27	20	12	42	34
4	4	4	4	3	3	3	3	4	4	4	4	4	4	4	4	4	4	4	4	4	4	4	4	4	4	4	4	4	3	4	3	4	3	4	133	25	19	12	44	33
4	4	4	4	4	4	4	4	4	4	4	4	4	4	4	4	4	4	4	4	4	4	4	3	4	3	3	3	3	3	3	3	3	3	3	129	28	20	12	42	27
3	2	1	3	3	2	1	4	4	1	3	3	3	3	3	3	3	1	2	2	2	2	1	1	2	1	3	3	2	4	2	2	1	3	2	81	15	15	9	20	22
3	3	2	3	4	2	2	3	3	2	3	3	2	3	2	3	2	2	2	2	2	2	3	3	2	2	2	2	2	4	2	2	3	3	2	87	19	14	7	25	22
3	3	3	3	3	3	3	3	3	3	3	3	3	3	3	3	3	3	3	3	3	3	3	3	3	3	3	3	3	3	3	3	3	3	3	105	21	15	9	33	27
2	2	3	3	3	3	2	3	4	3	3	3	3	3	3	3	3	2	2	2	2	2	3	3	3	2	2	3	3	2	2	2	3	2	2	91	18	16	9	27	21
2	1	2	2	1	1	1	2	2	2	2	3	2	3	3	3	3	3	2	2	1	3	2	3	3	3	3	3	3	3	2	2	2	2	1	78	10	11	8	28	21
4	4	4	3	3	2	2	3	3	3	3	3	2	2	2	1	3	3	2	2	2	3	1	2	2	1	4	3	3	3	3	2	3	3	3	92	22	15	6	22	27
4	4	4	4	4	3	3	3	4	4	4	4	4	4	3	4	4	3	4	4	4	3	4	4	3	4	4	4	3	4	4	2	3	3	3	127	26	19	11	41	30
4	3	3	3	4	3	2	4	4	2	3	3	2	2	2	2	2	2	3	2	3	3	3	3	4	4	4	3	4	2	3	4	3	3	4	105	22	16	6	31	30
3	4	3	2	4	4	4	4	4	3	4	4	4	4	4	4	3	4	3	3	3	3	4	3	4	3	3	4	3	4	3	4	3	4	3	123	24	19	12	37	31
4	4	3	3	3	3	3	4	4	3	3	3	3	3	3	3	3	3	3	3	3	3	3	4	3	3	3	3	3	3	3	3	3	3	3	110	23	17	9	34	27
3	3	3	3	3	4	4	4	4	4	4	4	4	3	3	3	3	3	4	3	4	3	3	3	3	3	4	3	3	3	3	3	3	4	3	117	23	20	10	35	29
2	3	4	4	2	2	2	3	3	2	4	3	2	2	3	4	3	2	2	2	2	2	2	1	3	1	3	3	3	3	1	1	2	2	1	84	19	15	7	24	19
																																			93.5288	20.5952

## Sheet: Professional identity scale
50.Nursing work gives me a sense of value	51.I feel confident to approach and deal with anyone I meet	52.The understanding and support of colleagues can make me feel happy	53.I firmly believe that people have subjective selectivity and initiative, not only to adapt to the professional environment, but also to create and optimize the professional environment	54.I think there are both inevitability and contingency in choosing a career. Only when you recognize him will you make a difference	55.Nursing work matches my interests and personality	56.Nursing career makes it easier for me to win the respect of the general public	57.I like to communicate with people and I am keen to find opportunities for social contact	58.The recognition of doctors and managers makes me feel happy	59.I feel that individuals can be exercised and grown in their careers	60.I think people who concentrate on their careers will definitely get rich rewards from their careers	61.Leaving my career as a nurse will cause me some emotional trauma	62.My daily work is full of things that interest me	63.I am confident in my social behavior	64.Nursing work allows me and my family to hold valuable medical resources	65.When encountering difficulties in my career, I will think positively, try to find a solution, and don't give up lightly	66.I think often analyzing my own strengths and weaknesses can narrow the gap between my ideal self and the real self in my career	67.Working in nursing makes me happy	68.When facing a problem, I can usually find several solutions	69.When facing a problem, I can usually find several solutions	70.When I encounter a setback in my career, I don't treat it as a stumbling block, but as a stepping stone, and treat it as an exercise in climbing a higher goal	71.Nursing work allows me to display my personal abilities and specialties	72.I prefer to compare with people who are better than myself, in order to motivate myself	73.When I am in a bad mood, I will talk to my friends, listen to music or participate in sports activities, etc. to adjust myself	74.If I try my best, I can always solve the problem	75.The current position allows me to use my abilities and gain a sense of happiness	76.Even if others oppose me, I still have a way to get what I want	77.When encountering difficulties, I compare with people who are in more difficult situations than me	78.I have a clear career development goal	79.I have a sense of responsibility to continue my nursing career	Professional identity scores	Professional identity evaluation	Professional social support	Social skill	Dealing with professional frustration	Professional self-reflection
3	3	2	3	3	3	2	3	3	3	3	4	3	3	4	3	2	3	2	4	3	3	4	3	4	3	3	3	3	3	91	27	19	18	19	8	91
4	4	5	5	4	4	4	4	4	4	4	4	3	4	3	4	4	3	4	5	4	4	4	4	3	3	4	3	4	5	118	34	24	24	24	12	118
3	3	4	4	3	2	3	3	4	4	4	2	2	4	3	2	2	2	4	3	4	3	3	4	3	2	3	4	4	4	95	23	22	20	21	9	95
5	2	5	5	5	4	4	4	4	4	4	4	4	4	4	5	4	5	5	5	5	5	5	4	4	5	3	5	5	5	132	41	27	23	28	13	132
3	3	4	3	3	2	3	2	4	3	3	3	2	3	4	4	3	2	3	4	3	2	2	3	3	2	2	3	2	3	86	22	22	15	18	9	86
1	2	2	2	2	2	3	2	1	2	2	1	2	1	2	1	1	1	1	1	2	2	2	2	2	2	2	2	2	1	51	15	10	10	11	5	51
4	4	4	4	4	4	4	4	4	4	4	3	2	4	4	4	4	4	4	4	4	4	4	4	4	4	4	4	4	4	117	33	24	24	24	12	117
4	3	4	3	4	4	3	4	3	4	4	3	2	4	4	4	4	3	2	4	4	3	4	4	4	4	2	3	3	4	105	30	22	19	22	12	105
4	4	5	4	4	4	4	3	4	4	5	4	3	3	4	4	4	4	3	5	4	3	3	4	4	4	3	4	2	4	114	34	26	19	22	13	114
2	2	4	4	4	2	2	2	2	4	2	1	1	4	4	4	4	2	4	4	4	4	4	2	4	3	3	4	4	4	94	21	20	19	24	10	94
5	4	5	5	5	5	5	5	5	5	5	4	5	4	3	5	4	5	5	5	5	5	4	4	4	5	3	4	4	5	137	44	26	25	28	14	137
3	4	4	4	3	4	4	4	4	4	4	4	4	4	4	4	4	4	4	4	4	4	4	4	3	4	3	2	4	4	114	35	22	23	23	11	114
3	4	4	4	3	4	2	4	4	3	3	4	3	4	4	4	4	4	4	4	4	4	4	4	5	4	4	5	4	5	116	33	25	24	24	10	116
3	3	3	3	2	3	2	3	3	3	3	3	3	2	4	3	3	4	3	4	4	4	4	4	4	4	4	3	3	3	97	29	21	19	20	8	97
3	3	3	3	4	2	3	5	2	3	3	2	2	4	2	3	3	2	2	4	4	4	4	4	3	2	2	4	3	3	91	23	19	20	19	10	91
1	5	5	5	5	5	5	5	5	5	5	2	5	5	5	5	5	2	5	5	5	5	5	5	5	5	5	5	5	2	137	32	30	30	30	15	137
5	5	4	4	3	4	3	4	4	4	4	4	5	4	4	5	4	4	4	4	4	4	4	5	4	4	5	5	4	5	126	38	26	26	25	11	126
2	3	4	4	4	4	4	4	4	4	4	4	4	3	4	4	4	4	4	4	4	4	4	4	4	4	4	4	4	4	116	34	24	22	24	12	116
4	4	4	4	4	4	3	4	4	4	3	1	2	4	2	4	3	4	4	4	3	2	2	4	4	2	2	4	2	4	99	26	22	20	21	10	99
2	3	3	3	4	3	3	3	2	2	3	3	2	3	4	4	4	3	4	2	2	2	3	5	3	3	2	3	3	2	88	23	19	18	17	11	88
4	4	4	3	3	4	3	3	4	4	2	2	3	4	4	4	4	4	4	4	3	4	3	4	3	3	3	4	4	4	106	31	24	21	21	9	106
2	3	3	3	4	3	3	3	2	2	3	3	2	3	4	4	4	3	4	2	2	2	3	5	3	3	2	3	3	2	88	23	19	18	17	11	88
5	5	5	5	5	5	1	3	5	3	3	3	2	2	3	3	3	4	4	5	3	2	4	4	3	3	3	5	3	5	109	30	27	21	20	11	109
3	4	4	4	4	4	2	3	3	3	3	1	3	4	3	4	3	1	5	3	5	3	3	4	4	3	3	5	5	5	104	25	22	22	25	10	104
2	4	4	4	3	2	2	4	3	4	3	3	2	4	2	4	3	2	4	4	3	3	4	2	4	3	2	2	4	4	94	23	17	22	23	9	94
3	3	3	3	4	3	3	4	4	4	4	4	3	3	4	4	4	4	4	4	4	4	4	4	4	4	4	4	5	4	113	32	23	22	24	12	113
3	4	4	4	4	4	3	4	5	4	4	4	3	3	3	4	4	3	4	5	4	4	3	4	4	3	3	4	4	4	113	31	25	21	24	12	113
1	1	5	1	1	5	1	5	5	5	5	1	1	5	5	5	5	5	5	5	5	5	5	5	5	5	5	5	5	5	122	29	30	26	26	11	122
3	3	4	3	4	3	2	2	4	2	2	3	2	3	2	4	4	2	3	4	2	2	4	3	3	2	2	4	2	4	87	23	21	17	16	10	87
5	5	5	5	5	5	5	5	5	5	5	5	5	5	5	5	5	5	5	5	5	5	5	5	5	5	5	5	5	5	150	45	30	30	30	15	150
4	4	5	5	5	4	3	5	5	5	5	4	4	4	4	4	4	4	4	4	5	4	5	4	5	4	3	4	5	5	130	36	26	25	29	14	130
3	4	4	3	4	2	3	2	3	3	3	3	1	3	4	4	4	3	3	4	4	4	1	5	4	3	3	3	3	3	96	25	23	16	21	11	96
5	4	4	4	4	4	4	4	4	4	3	3	3	4	4	4	4	4	4	4	3	4	4	4	4	4	3	4	3	4	115	35	24	23	22	11	115
4	4	5	5	4	4	4	2	5	5	5	4	2	2	4	4	5	4	4	5	5	5	4	4	3	4	3	5	5	5	124	36	28	19	27	14	124
3	3	3	3	3	4	3	4	4	3	3	3	3	4	3	4	4	4	4	4	4	4	3	4	3	3	3	4	3	4	104	31	22	21	20	10	104
5	4	5	5	5	5	5	4	4	4	5	4	3	4	3	4	4	4	3	5	4	4	4	4	4	4	4	4	4	4	125	38	25	23	25	14	125
4	3	4	4	4	2	2	2	4	4	4	3	2	4	4	4	4	3	4	4	4	4	4	4	4	3	3	2	4	4	105	27	22	20	24	12	105
2	3	3	2	4	3	2	2	3	3	2	1	1	4	3	3	2	1	3	3	3	3	3	4	3	2	1	1	2	4	76	19	17	16	16	8	76
4	4	4	5	5	5	4	5	5	5	4	4	4	2	2	5	4	4	4	5	4	4	4	5	5	5	4	5	4	4	128	38	26	23	28	13	128
4	4	4	4	4	4	4	4	4	4	3	4	4	3	4	4	4	4	3	4	4	4	4	4	4	4	4	4	4	4	117	36	24	22	24	11	117
4	3	5	4	4	3	3	2	5	5	3	4	4	3	3	4	4	4	4	5	4	5	4	3	3	4	3	3	4	4	113	35	24	19	24	11	113
2	4	4	3	4	4	2	3	4	4	2	4	3	3	4	4	4	2	3	4	4	3	4	4	4	3	3	4	4	4	104	27	24	20	23	10	104
3	4	4	4	3	4	2	3	4	4	3	4	2	4	4	4	4	3	3	5	4	4	4	4	4	4	4	4	3	4	110	30	25	22	23	10	110
3	3	5	3	5	4	4	2	5	5	3	3	2	3	4	4	4	3	4	5	4	3	3	3	4	3	3	3	4	4	108	29	25	18	24	12	108
4	4	4	4	4	3	3	4	4	4	4	3	3	4	3	4	4	4	4	4	4	4	4	4	4	4	4	4	4	4	115	32	23	24	24	12	115
1	4	4	5	5	4	3	4	4	4	5	4	3	4	4	5	5	3	4	5	5	5	3	5	4	2	4	4	4	5	121	30	26	23	27	15	121
2	2	5	2	3	2	1	5	5	4	3	2	2	4	4	4	3	2	4	4	3	2	4	5	4	1	3	4	4	4	97	18	27	22	21	9	97
4	4	4	4	4	4	4	3	4	4	4	3	3	4	4	4	4	4	4	4	4	4	4	4	4	5	3	4	4	5	118	36	24	22	24	12	118
4	4	4	4	3	4	3	5	5	4	3	4	4	4	4	5	5	4	4	5	4	4	4	4	4	5	3	5	4	4	123	36	27	24	25	11	123
1	2	4	4	5	1	1	2	3	4	5	1	2	2	4	4	4	2	3	4	3	2	4	4	4	2	2	4	2	4	89	16	23	15	21	14	89
4	4	4	4	4	4	3	3	4	4	3	4	4	4	4	4	4	4	4	4	4	4	3	4	4	3	3	4	3	3	112	33	24	21	23	11	112
3	5	5	5	5	3	2	4	3	3	3	3	2	5	5	3	3	3	3	3	2	2	2	5	5	4	3	5	3	5	107	27	26	22	21	11	107
5	5	5	5	5	5	5	5	5	5	5	5	5	5	5	5	5	5	5	5	5	5	5	5	5	5	5	5	5	5	150	45	30	30	30	15	150
2	3	4	3	3	3	2	3	4	4	3	3	3	3	3	4	4	3	3	4	3	2	3	4	3	3	3	4	2	4	95	25	23	18	19	10	95
4	3	4	4	4	4	3	3	5	4	4	3	4	4	4	4	4	4	4	4	4	4	4	4	4	4	4	4	4	4	117	34	25	22	24	12	117
5	3	5	5	5	5	5	5	5	5	5	5	5	4	5	5	5	4	5	5	5	5	5	5	5	5	5	5	5	5	146	44	30	27	30	15	146
5	3	5	5	5	4	4	4	4	4	3	4	4	4	3	5	4	4	4	5	4	4	4	5	5	5	4	4	4	5	127	39	26	23	27	12	127
3	3	4	4	4	4	3	3	4	4	4	4	4	3	4	4	4	4	4	5	4	4	4	4	4	4	4	4	4	5	117	35	25	21	24	12	117
2	3	4	4	4	3	3	3	4	3	4	3	3	4	3	4	4	2	3	4	4	4	4	4	4	4	3	4	3	3	104	27	23	20	22	12	104
5	5	5	4	5	5	5	4	5	5	5	5	5	5	5	5	5	5	5	5	5	5	4	5	5	5	4	1	5	5	142	45	26	27	29	15	142
4	5	4	4	4	4	4	3	4	4	4	5	4	4	4	4	4	4	4	5	4	4	4	5	5	5	4	4	4	4	125	38	26	24	25	12	125
4	2	3	3	3	4	2	3	2	3	2	4	4	2	2	4	4	4	4	4	3	3	3	4	3	3	3	2	2	4	93	32	17	17	18	9	93
3	3	5	4	4	3	3	2	5	4	4	3	2	4	4	4	4	2	3	5	2	3	2	4	4	4	3	5	4	4	106	27	28	17	22	12	106
4	3	4	5	5	5	5	3	5	5	5	5	4	4	4	5	5	5	5	5	5	5	5	5	5	5	5	5	5	5	141	43	28	25	30	15	141
4	4	4	4	4	4	3	3	4	4	4	3	3	3	3	4	3	3	3	4	3	3	3	4	4	4	3	4	3	4	106	31	23	19	22	11	106
2	3	4	4	5	4	3	4	5	5	4	4	3	3	4	4	4	3	3	5	4	4	4	4	4	3	3	4	3	4	113	30	26	20	24	13	113
5	4	4	4	5	5	5	5	5	4	4	2	2	5	5	5	5	3	5	5	4	4	4	5	5	2	4	4	5	5	129	33	28	27	27	14	129
1	1	1	1	1	1	1	1	1	5	5	5	5	5	5	5	5	5	5	5	5	4	4	4	4	4	4	5	5	4	107	30	21	20	25	11	107
2	2	2	5	5	1	4	2	1	5	5	1	2	5	1	1	5	4	4	4	4	4	4	4	4	4	4	1	4	5	99	27	13	21	23	15	99
3	3	3	3	3	3	3	3	3	3	3	3	3	3	4	3	3	3	3	3	3	3	3	3	3	3	3	3	3	3	91	27	19	18	18	9	91
4	4	4	3	4	3	3	4	4	4	4	3	3	4	4	4	4	3	4	4	4	4	3	4	4	4	4	4	4	4	113	31	24	23	23	12	113
5	2	4	4	4	4	2	1	3	2	2	2	2	2	1	4	4	2	4	4	2	2	3	2	4	4	4	4	3	4	90	27	18	16	19	10	90
4	3	5	3	4	4	3	3	4	3	2	3	4	3	4	4	3	4	3	5	3	4	3	4	4	4	3	3	3	3	105	33	25	18	20	9	105
2	2	3	4	4	2	2	2	2	4	4	2	2	2	4	4	4	2	3	4	5	4	2	4	4	2	2	4	2	2	89	20	21	13	23	12	89
4	4	4	4	4	4	4	4	4	4	4	4	4	4	2	4	4	2	2	4	4	4	4	4	4	4	4	4	3	4	113	34	22	22	23	12	113
4	4	3	4	4	4	4	4	4	5	4	4	4	5	5	4	4	4	5	5	5	5	5	5	5	5	5	5	5	5	134	39	27	28	28	12	134
5	5	5	5	4	5	4	5	4	4	5	4	5	5	5	5	5	5	5	5	5	5	5	5	5	5	5	5	5	5	145	43	29	30	29	14	145
4	4	4	4	4	4	4	4	4	4	3	3	4	4	4	4	4	3	4	4	4	4	4	4	4	3	3	4	4	5	116	34	24	23	24	11	116
5	5	5	5	5	3	3	5	5	5	5	3	2	3	5	5	5	3	5	5	5	5	5	3	5	2	2	5	2	3	124	29	28	25	27	15	124
4	4	4	4	4	4	3	3	4	4	4	2	2	4	4	4	4	2	3	4	4	3	4	4	4	4	3	4	4	4	109	28	24	21	24	12	109
4	4	4	4	3	4	4	4	4	4	4	4	3	3	4	4	4	4	4	5	4	4	4	4	4	4	2	4	4	4	116	35	25	21	24	11	116
2	2	4	3	3	4	2	3	3	3	4	3	3	3	3	4	4	3	4	4	3	3	4	4	3	3	3	4	3	3	97	26	22	19	19	11	97
3	3	3	3	3	3	3	2	3	3	3	2	3	3	3	3	4	3	2	4	3	4	4	4	4	4	3	4	4	4	97	29	21	17	20	10	97
5	5	5	5	5	5	5	4	4	5	5	3	4	4	5	4	4	4	4	5	5	4	2	5	4	5	2	5	4	5	131	40	29	21	27	14	131
4	3	4	3	4	4	3	3	4	4	4	4	3	3	4	4	3	4	3	4	3	4	3	3	3	4	3	4	4	4	107	34	23	18	21	11	107
5	2	5	5	5	2	5	5	5	5	5	4	5	2	2	5	5	4	2	5	5	5	5	5	5	5	5	5	2	4	129	39	27	21	27	15	129
4	4	4	4	4	4	4	3	3	4	4	4	4	4	4	4	4	4	4	4	4	4	4	4	4	4	4	4	4	4	118	36	23	23	24	12	118
3	2	5	3	4	1	2	1	5	4	3	3	2	3	2	4	5	4	3	5	4	3	2	5	3	2	3	4	3	5	98	25	26	14	21	12	98
5	4	5	3	5	4	3	3	5	5	5	3	4	4	4	5	4	4	4	5	5	4	5	5	4	5	4	3	3	5	127	37	27	24	25	14	127
2	2	5	4	4	2	2	2	4	4	2	4	2	2	4	4	4	2	4	4	4	2	4	4	4	2	4	4	4	4	99	22	25	18	24	10	99
5	3	3	3	3	3	3	2	3	3	2	2	3	3	3	3	2	2	2	3	2	2	4	3	4	4	4	4	4	4	91	28	19	18	19	7	91
2	2	5	4	5	1	1	4	2	5	2	2	2	3	1	5	5	1	5	4	4	1	5	3	5	1	1	5	5	5	96	16	20	20	28	12	96
3	2	3	3	3	5	4	2	3	4	2	3	2	2	3	4	3	4	3	4	3	3	3	3	2	2	2	3	3	5	91	31	19	14	19	8	91
4	4	5	4	5	4	4	4	5	4	5	3	3	5	5	5	5	4	4	5	5	5	5	5	5	5	5	5	5	5	137	37	30	27	28	15	137
4	3	4	3	4	4	4	4	4	4	4	4	4	4	3	4	4	4	4	3	4	4	4	4	4	4	3	4	3	4	114	36	22	22	22	12	114
4	3	4	4	4	4	3	4	3	4	4	3	3	3	4	4	4	4	3	4	4	3	4	4	4	3	4	3	3	4	109	31	22	21	23	12	109
1	5	5	5	5	5	1	5	1	1	1	5	1	5	1	1	1	1	5	5	5	1	1	5	5	5	1	5	1	5	94	25	22	22	18	7	94
4	4	4	4	4	4	2	4	4	4	4	4	4	4	2	5	5	4	5	5	5	5	5	5	5	5	2	5	4	5	126	37	25	24	27	13	126
4	4	4	4	4	3	4	4	4	4	4	3	3	4	4	4	4	3	4	4	3	3	3	4	4	4	3	4	4	4	112	31	24	22	23	12	112
4	5	5	3	3	4	4	4	5	5	4	2	3	4	5	5	5	4	4	5	4	4	5	4	4	4	3	5	4	5	125	34	29	25	25	12	125
3	4	4	4	4	4	4	4	4	4	5	4	4	3	4	4	4	4	4	4	4	3	3	4	4	4	3	4	4	4	116	34	24	21	24	13	116
4	4	4	4	4	4	4	4	4	4	4	4	4	4	4	4	4	4	4	4	4	4	4	4	4	4	4	4	4	4	120	36	24	24	24	12	120
3	3	4	3	4	3	3	3	3	4	3	3	3	4	4	4	4	3	3	4	3	3	5	4	3	4	3	4	3	4	104	29	23	21	20	11	104
3	2	4	2	4	2	2	2	4	4	4	2	2	4	4	4	4	2	3	4	4	2	3	3	3	3	3	4	3	3	93	21	23	17	20	12	93
4	2	4	4	4	5	4	3	5	5	5	5	2	2	3	5	5	4	4	5	3	5	5	5	4	2	1	5	3	5	118	36	27	17	24	14	118
3	3	4	3	3	4	3	3	3	3	3	3	3	3	2	4	3	3	4	4	4	3	3	4	3	3	3	3	3	4	97	29	20	19	20	9	97
2	2	2	4	5	3	3	2	5	5	4	5	3	5	5	4	4	1	3	3	3	3	4	3	3	2	3	2	3	3	99	25	20	19	22	13	99
5	3	5	4	5	4	5	4	5	5	3	4	3	4	5	4	4	4	4	5	4	4	4	5	4	4	3	4	4	4	125	37	29	22	25	12	125
5	5	5	1	5	5	1	1	1	5	1	5	1	5	1	5	1	5	5	5	1	5	1	5	5	5	5	5	1	5	106	37	22	22	18	7	106
4	3	4	4	4	3	3	3	4	4	4	3	3	4	3	5	4	3	5	4	4	4	4	3	4	3	4	4	4	4	112	30	22	23	25	12	112
3	3	4	4	4	3	3	3	4	4	3	3	3	3	3	4	4	3	3	4	2	3	3	3	3	3	3	3	3	3	97	27	21	18	20	11	97
4	4	4	4	4	4	4	4	4	4	4	5	5	5	5	5	5	5	5	5	5	5	5	5	5	5	5	5	5	5	139	42	28	28	28	13	139
3	3	4	3	4	4	3	4	4	4	4	4	4	4	4	4	4	4	4	5	4	3	3	3	4	3	3	4	4	4	112	32	24	21	23	12	112
3	4	4	4	4	4	2	3	4	4	4	4	3	4	4	4	3	4	4	4	4	3	4	4	4	4	4	4	3	3	111	30	24	23	23	11	111
2	5	4	5	4	4	2	4	4	4	4	4	4	4	4	5	5	5	5	5	5	5	5	5	5	5	5	5	5	5	133	36	27	28	29	13	133
3	4	4	4	4	4	3	3	3	3	3	3	3	3	3	3	3	3	3	4	3	3	3	3	3	3	3	4	3	3	97	28	21	19	19	10	97
4	4	4	4	4	4	4	4	5	4	4	3	3	4	4	4	4	4	4	5	4	4	4	5	4	3	5	5	4	4	122	33	28	25	24	12	122
1	5	5	5	5	1	5	5	5	5	5	1	1	5	5	5	5	5	5	5	5	5	5	5	5	5	5	5	5	5	134	29	30	30	30	15	134
4	4	4	4	4	4	4	4	4	4	4	3	4	4	4	4	4	4	4	4	4	4	4	4	4	4	4	4	4	4	119	35	24	24	24	12	119
3	3	5	4	4	4	4	4	4	4	3	4	3	4	4	4	4	4	3	4	4	4	4	4	4	4	4	4	4	4	116	34	25	22	24	11	116
4	4	4	5	5	4	4	3	4	4	3	4	4	4	3	4	4	4	3	5	4	4	4	3	5	4	3	4	3	4	117	36	23	21	25	12	117
2	4	5	4	4	4	2	4	4	4	4	4	2	4	2	4	4	2	4	4	4	2	4	4	2	2	2	4	2	4	101	24	23	22	20	12	101
5	3	4	5	4	4	4	3	4	5	5	3	4	4	5	5	3	5	3	5	4	5	4	4	4	4	4	3	4	4	123	38	25	21	27	12	123
1	5	4	4	3	1	1	2	1	3	3	2	2	2	4	4	4	2	4	4	4	2	2	4	4	2	2	4	2	2	84	15	21	17	21	10	84
4	4	4	4	4	4	4	4	4	4	4	4	4	4	2	4	4	4	4	4	4	4	4	4	4	4	4	4	4	4	118	36	22	24	24	12	118
4	3	5	5	4	3	4	3	5	4	5	4	3	3	4	5	4	4	4	5	4	4	4	5	3	3	3	4	4	4	119	33	28	20	25	13	119
5	5	5	5	5	4	5	5	5	5	5	5	5	5	5	5	5	5	5	5	5	5	5	5	5	5	5	5	5	5	149	44	30	30	30	15	149
4	4	4	4	4	4	4	3	4	4	4	4	3	4	5	5	5	5	5	5	4	5	5	5	5	4	3	2	4	5	126	38	25	24	26	13	126
4	4	3	4	4	2	3	3	4	4	4	3	2	4	3	4	4	3	5	4	4	3	3	5	4	4	3	4	3	3	107	27	23	22	23	12	107
4	3	4	4	4	4	4	2	4	4	4	3	3	3	3	4	4	4	3	4	3	3	4	3	4	4	3	3	3	4	106	33	21	18	22	12	106
3	4	3	3	3	4	3	4	3	3	3	2	3	4	4	4	4	4	4	5	3	3	3	3	4	3	3	3	4	4	103	29	21	22	21	10	103
4	5	5	3	2	5	4	5	3	3	5	2	4	5	5	5	4	4	2	5	4	4	4	5	5	4	4	4	2	5	121	36	27	25	22	11	121
5	4	4	4	4	5	4	4	4	4	4	4	4	4	4	4	4	4	4	4	4	4	4	4	4	4	3	4	3	4	120	38	24	23	23	12	120
5	1	5	1	5	5	1	5	5	4	5	1	1	4	4	5	5	1	1	1	4	5	5	5	5	5	1	4	4	5	108	29	24	17	23	15	108
4	4	5	4	5	4	4	4	4	4	4	4	4	4	4	4	4	4	4	4	4	4	4	4	4	4	4	4	4	4	122	36	25	24	24	13	122
5	4	4	4	4	4	4	3	4	4	4	2	3	3	3	3	4	3	4	4	3	4	3	4	4	3	3	4	4	4	109	32	23	20	22	12	109
4	4	4	4	4	4	4	4	4	4	4	4	4	4	4	4	4	4	4	4	4	4	4	4	4	4	3	4	4	4	119	36	24	23	24	12	119
5	5	5	5	5	5	5	5	5	5	5	5	3	5	5	5	5	5	5	5	4	5	4	5	5	5	4	5	5	5	145	43	30	28	29	15	145
3	3	4	3	4	3	3	2	4	3	3	2	2	3	3	3	3	3	4	4	3	3	3	4	4	3	3	4	4	3	96	25	23	18	20	10	96
3	3	5	5	4	4	2	3	5	4	5	3	4	3	4	5	5	2	4	5	4	4	4	5	5	4	3	5	5	5	122	31	29	20	28	14	122
4	3	5	5	5	4	3	2	4	5	5	4	4	4	4	5	5	4	5	5	4	3	5	5	5	5	4	5	3	5	129	36	28	23	27	15	129
5	5	5	5	5	5	5	5	5	5	5	5	5	5	5	5	5	5	5	5	5	5	5	5	5	5	5	5	5	5	150	45	30	30	30	15	150
3	4	2	3	3	3	2	4	3	3	3	3	2	4	4	3	3	3	3	5	3	3	5	5	5	3	3	3	5	4	102	26	22	23	22	9	102
5	5	5	5	5	5	5	5	5	5	5	5	5	5	5	5	3	5	5	5	5	5	5	5	5	5	5	5	5	5	148	45	30	30	30	13	148
4	4	4	4	4	4	4	4	4	4	4	3	4	4	4	4	4	4	3	4	4	4	4	4	4	4	3	4	4	4	117	35	24	22	24	12	117
5	5	5	5	5	5	5	5	5	5	5	5	5	5	5	5	4	2	5	5	5	5	2	5	5	5	2	5	4	5	139	42	30	24	29	14	139
5	5	5	5	5	4	5	3	5	5	5	4	3	3	4	4	4	4	3	4	3	4	4	4	4	4	3	4	4	4	123	37	26	21	25	14	123
3	3	4	2	4	3	1	4	4	4	3	1	2	4	3	4	3	2	4	4	3	3	4	4	4	2	1	3	4	4	94	21	22	20	21	10	94
4	3	4	5	4	3	4	2	4	4	4	3	4	4	4	4	4	4	3	4	4	4	4	3	4	4	3	4	4	5	114	35	23	19	25	12	114
3	3	4	4	4	2	2	3	4	3	3	2	3	2	3	4	3	2	3	4	3	2	3	3	3	3	1	2	2	2	85	21	20	15	19	10	85
3	3	3	3	3	3	3	2	2	2	4	3	3	3	3	3	3	3	3	3	3	3	3	3	4	4	4	4	3	4	93	29	18	18	18	10	93
3	5	5	4	5	4	3	2	5	5	4	2	2	4	2	4	4	3	4	4	4	5	4	5	5	5	4	5	5	5	121	32	26	23	27	13	121
4	4	4	4	4	4	5	4	5	5	5	4	4	4	4	4	4	5	4	5	4	4	4	4	4	4	4	4	4	4	126	38	26	24	25	13	126
3	4	4	4	4	3	3	2	4	4	4	4	3	3	3	4	4	4	3	4	4	4	3	4	4	4	3	4	3	4	108	32	23	18	23	12	108
4	2	4	4	4	3	3	2	3	3	2	2	2	2	2	3	3	3	4	5	4	3	4	4	2	4	4	3	3	3	94	27	21	18	19	9	94
5	3	4	4	4	4	4	3	4	4	4	5	4	3	4	4	4	4	4	4	4	4	4	3	4	4	3	4	4	5	118	39	23	20	24	12	118
4	5	5	4	4	2	2	4	5	5	4	3	3	4	2	5	5	3	4	4	4	3	4	4	4	3	3	4	3	4	113	27	24	24	25	13	113
4	4	4	4	4	4	4	4	4	4	4	4	4	4	4	4	4	4	4	4	4	4	4	4	4	4	4	4	4	4	120	36	24	24	24	12	120
3	4	5	5	4	4	3	4	4	4	4	3	3	4	4	4	4	4	4	4	4	4	4	5	4	4	4	4	3	4	118	32	26	24	24	12	118
4	4	4	4	4	4	4	4	4	4	4	4	4	4	4	4	4	4	3	4	4	4	4	4	4	4	3	4	4	4	118	36	24	22	24	12	118
4	4	5	5	4	3	2	3	5	5	3	4	4	4	3	5	5	4	4	5	5	3	4	5	5	4	3	4	4	4	122	32	27	22	29	12	122
2	4	5	5	5	2	2	2	5	5	2	2	2	4	4	4	4	4	3	5	4	4	4	3	4	4	2	3	3	4	106	26	25	19	25	11	106
4	4	4	4	4	4	4	4	4	4	4	4	4	4	4	4	4	4	4	4	4	4	4	4	4	4	4	4	4	4	120	36	24	24	24	12	120
3	3	4	4	4	3	3	3	3	4	4	3	3	3	3	4	4	4	4	4	3	4	3	3	4	4	4	4	3	4	106	31	21	20	22	12	106
4	3	4	4	4	2	3	2	4	4	5	2	1	4	3	4	4	2	3	4	4	3	4	4	4	3	3	2	2	3	98	23	21	19	22	13	98
4	3	5	4	5	4	3	4	4	4	4	4	3	5	4	4	4	4	4	4	3	5	4	4	4	4	2	4	3	5	118	36	25	22	22	13	118
3	3	4	5	5	3	3	4	5	4	4	4	3	4	4	4	4	3	4	5	3	3	4	4	4	4	4	4	4	4	116	30	26	23	24	13	116
2	4	3	5	3	4	1	3	4	3	4	3	3	4	3	5	5	3	5	5	3	4	4	4	5	4	3	3	3	5	110	29	22	23	24	12	110
3	4	5	4	4	3	3	4	5	4	3	3	3	4	4	4	4	3	4	5	4	3	3	4	4	3	3	4	3	4	111	28	27	22	23	11	111
5	5	5	3	4	5	5	2	5	5	4	4	2	4	1	5	5	4	4	5	4	5	5	5	4	5	4	5	5	5	129	40	26	24	26	13	129
5	5	5	5	5	5	5	5	5	5	5	5	5	5	5	5	5	5	5	5	5	5	5	5	5	5	5	5	5	5	150	45	30	30	30	15	150
3	3	4	4	4	3	3	3	4	3	4	3	3	4	4	4	4	3	4	4	4	3	4	4	4	4	4	4	4	4	110	29	24	22	23	12	110
4	4	4	4	4	4	4	4	4	4	4	4	4	4	4	4	4	4	4	4	4	4	4	4	4	4	4	4	4	4	120	36	24	24	24	12	120
4	4	4	3	4	4	3	4	4	5	4	3	3	4	4	4	4	3	4	4	3	3	4	4	4	4	3	4	3	4	112	31	24	23	22	12	112
4	4	4	4	4	4	4	4	4	4	4	4	4	4	4	4	4	4	4	4	4	4	4	4	4	4	4	4	4	4	120	36	24	24	24	12	120
4	4	4	4	5	4	4	4	4	4	5	4	4	4	4	4	4	4	4	5	4	4	4	4	4	4	3	4	4	4	122	36	25	23	24	14	122
4	3	4	4	4	3	2	2	4	4	4	2	2	3	4	4	4	3	2	4	4	2	3	4	4	4	4	4	4	3	102	25	24	17	24	12	102
4	4	4	4	4	4	4	4	4	4	1	4	3	4	4	4	4	4	4	4	4	4	5	3	4	4	3	4	4	4	115	35	23	24	24	9	115
5	5	5	5	5	5	5	5	5	5	5	1	5	5	5	5	5	5	5	5	5	5	5	5	5	5	5	1	5	5	142	41	26	30	30	15	142
5	4	5	5	5	4	3	3	5	5	4	5	4	4	4	4	4	4	4	5	4	4	5	5	3	4	3	4	4	5	127	38	28	23	25	13	127
4	4	4	4	4	4	3	4	4	3	4	4	4	4	4	4	4	5	4	4	4	4	4	4	4	4	3	4	4	4	118	36	24	23	23	12	118
1	3	4	5	5	2	1	1	5	2	5	1	1	3	1	3	3	1	3	3	1	2	5	3	5	1	3	3	4	4	84	14	19	18	20	13	84
5	4	4	4	4	4	4	4	4	4	4	4	4	4	4	4	4	4	4	4	4	4	4	4	4	4	4	4	4	4	121	37	24	24	24	12	121
3	3	4	4	4	3	2	4	4	4	3	3	2	3	4	3	3	3	4	4	3	3	4	4	3	2	2	4	3	3	98	24	24	20	20	10	98
2	5	4	5	5	4	4	4	3	4	3	3	2	4	4	5	5	4	4	4	4	4	3	4	4	4	3	4	4	4	116	31	23	23	26	13	116
4	4	4	4	4	4	3	3	4	4	4	4	3	3	3	3	3	3	3	3	3	3	3	3	3	3	2	3	3	3	99	30	20	18	20	11	99
3	3	4	4	4	3	3	2	4	4	4	4	3	4	4	4	4	3	4	4	4	4	3	4	4	4	2	4	3	4	108	31	24	18	23	12	108
4	4	4	4	4	4	4	4	4	4	3	3	3	3	4	4	4	4	4	4	4	4	4	4	4	4	4	4	4	4	116	34	24	23	24	11	116
4	3	4	4	4	4	4	4	4	4	3	3	4	4	4	4	4	4	4	4	4	4	4	4	4	4	4	4	4	4	117	35	24	23	24	11	117
4	4	4	4	4	4	4	4	4	4	4	3	4	4	4	4	4	4	4	4	4	4	4	4	4	4	4	4	4	4	119	35	24	24	24	12	119
4	3	4	4	4	4	4	4	4	4	4	4	4	4	4	4	4	4	4	4	4	4	4	4	4	4	4	4	4	4	119	36	24	23	24	12	119
1	5	5	1	5	1	1	1	1	1	1	1	1	5	5	5	5	5	5	5	5	5	5	5	5	5	5	5	5	5	110	25	26	26	22	11	110
4	4	4	4	4	4	4	2	4	4	3	2	3	3	2	3	4	4	3	5	4	3	4	4	4	3	4	4	4	4	108	31	23	20	23	11	108
4	3	5	2	3	3	4	5	1	2	2	2	2	4	5	5	4	2	4	5	4	5	4	5	4	5	4	5	4	5	112	32	26	24	21	9	112
5	5	5	5	5	5	5	5	5	5	5	5	4	5	5	5	5	5	5	5	5	5	5	5	5	5	5	5	5	5	149	44	30	30	30	15	149
5	3	5	5	5	5	5	5	5	5	5	5	5	3	5	5	5	5	5	5	5	5	4	5	5	5	5	5	5	5	145	45	30	25	30	15	145
4	4	5	5	5	4	3	2	5	5	5	4	4	3	5	5	5	4	3	5	4	2	4	5	5	4	4	4	5	5	127	34	29	20	29	15	127
4	4	4	4	5	4	4	5	5	4	3	3	3	4	3	4	4	3	4	4	3	3	4	4	4	3	3	4	4	4	114	31	24	24	23	12	114
4	4	4	4	4	4	4	4	4	3	4	4	4	4	4	4	4	4	4	4	4	4	4	4	4	4	4	4	4	4	119	36	24	24	23	12	119
5	5	5	5	5	5	5	5	5	5	5	4	5	5	5	5	5	5	5	5	5	5	5	5	5	5	5	5	5	5	149	44	30	30	30	15	149
5	5	5	5	5	4	5	3	5	5	4	4	5	4	5	4	4	5	4	5	5	5	5	5	5	5	2	4	4	5	136	43	29	23	28	13	136
5	4	4	4	4	4	4	4	4	4	4	4	4	4	4	4	4	4	4	4	4	4	4	4	4	4	4	4	4	4	121	37	24	24	24	12	121
4	4	4	4	4	4	4	4	4	4	4	4	4	4	4	4	4	4	3	4	3	3	4	4	4	4	3	4	3	4	115	35	24	22	22	12	115
3	3	4	4	4	3	3	3	4	4	4	3	2	3	3	3	3	3	3	4	3	3	3	4	4	3	3	4	3	3	99	26	23	18	21	11	99
3	2	2	2	2	4	3	2	2	4	2	3	3	3	2	4	4	4	2	5	3	2	4	4	3	2	2	4	4	4	90	28	19	15	20	8	90
1	1	1	1	1	1	1	1	1	1	1	1	1	1	1	1	1	1	1	2	1	1	1	1	1	1	1	1	1	1	31	9	7	6	6	3	31
4	4	3	4	4	4	4	3	3	4	4	4	3	3	4	4	4	4	4	4	4	4	4	4	4	4	4	4	4	4	115	35	22	22	24	12	115
1	1	5	1	5	1	1	1	5	5	1	1	1	1	1	1	5	1	1	1	1	1	1	5	5	1	1	1	5	5	66	13	18	6	18	11	66
4	3	4	4	4	4	4	3	3	4	4	3	2	3	2	4	4	2	3	4	4	4	4	3	4	4	4	2	4	3	104	30	18	20	24	12	104
4	3	4	4	3	4	3	3	4	4	2	4	3	3	3	4	3	4	4	4	4	3	4	3	3	4	3	4	4	4	106	33	22	20	23	8	106
4	5	3	3	4	4	3	5	3	3	3	3	4	4	3	4	3	4	4	4	4	5	5	3	4	3	3	3	4	5	112	35	19	26	22	10	112
5	4	5	4	4	5	5	5	5	5	5	4	5	4	4	4	5	5	4	5	5	5	5	4	5	5	4	5	5	5	140	44	28	26	28	14	140
2	2	2	2	2	1	1	1	1	1	1	3	1	1	1	1	1	3	1	3	3	3	5	5	5	3	3	3	3	3	67	20	15	13	15	4	67
3	4	4	4	4	3	2	2	4	3	3	4	3	4	3	4	4	4	4	4	4	4	4	4	4	3	3	4	4	4	108	30	23	21	23	11	108
3	2	4	5	5	4	4	2	4	5	5	2	4	3	5	5	4	4	3	4	4	2	5	4	5	4	1	4	4	5	115	32	25	16	28	14	115
5	5	5	5	5	5	5	5	5	5	5	5	5	5	5	5	5	5	5	5	5	5	5	5	5	5	5	5	5	5	150	45	30	30	30	15	150
3	1	5	5	5	3	1	1	3	3	2	3	3	5	3	3	5	2	3	3	4	4	4	5	3	2	2	2	5	4	97	25	21	16	23	12	97
3	3	4	4	4	2	2	3	4	4	3	3	2	4	2	4	4	2	4	4	4	3	2	5	4	4	2	4	3	4	100	25	23	18	23	11	100
3	5	5	5	5	5	5	5	5	5	5	5	1	5	5	5	5	5	5	5	5	5	5	5	5	5	1	5	5	5	140	39	30	26	30	15	140
5	5	5	5	5	5	3	4	4	4	4	2	2	3	4	4	3	3	3	3	3	3	3	3	4	3	3	3	3	3	107	29	22	21	23	12	107
4	2	3	3	4	3	3	3	3	3	3	3	4	3	3	3	3	3	3	3	4	3	3	3	3	3	3	3	3	3	93	29	18	17	19	10	93
4	4	4	4	4	4	4	4	4	4	4	2	3	4	4	4	4	4	4	4	4	4	4	4	4	4	3	4	4	4	116	33	24	23	24	12	116
5	4	5	5	5	4	4	4	4	3	3	4	4	4	4	4	3	4	3	5	4	4	3	3	4	3	2	4	4	5	117	37	25	20	24	11	117
3	3	4	4	4	4	4	3	4	4	4	4	4	4	4	4	4	4	4	4	4	4	4	4	4	4	4	4	3	4	116	35	24	22	23	12	116
4	4	4	4	4	4	3	4	4	4	4	4	3	4	4	4	4	4	3	4	4	4	4	4	4	4	4	4	4	4	117	34	24	23	24	12	117
3	3	4	3	4	2	2	4	4	3	3	2	2	4	3	4	4	3	3	4	4	3	4	4	4	2	2	4	4	4	99	23	23	20	22	11	99
4	4	4	4	4	4	4	4	4	4	4	4	4	4	4	4	4	4	4	4	4	4	4	4	4	4	4	4	4	4	120	36	24	24	24	12	120
3	3	4	4	4	3	3	4	4	4	4	4	3	3	4	4	4	3	4	4	4	4	4	4	4	4	4	4	4	4	113	31	24	22	24	12	113
4	5	5	5	5	5	4	5	4	5	5	5	5	5	5	5	4	4	4	4	5	5	5	4	5	5	4	4	4	5	139	42	26	28	29	14	139
3	4	4	4	3	4	4	4	4	4	4	3	4	4	3	4	4	4	4	4	4	4	4	4	4	4	4	4	4	4	116	34	23	24	24	11	116
4	4	4	4	3	4	4	4	4	4	1	2	4	4	4	4	4	4	4	4	4	3	4	5	4	3	4	4	4	4	113	32	25	24	24	8	113
3	3	4	3	3	3	3	3	3	4	3	2	3	3	2	4	4	3	4	3	4	3	4	4	4	3	3	4	4	4	100	27	20	20	23	10	100
4	4	4	4	5	4	4	4	4	4	4	4	4	4	5	4	4	4	4	5	5	5	5	4	4	4	4	4	4	4	126	37	26	25	25	13	126
5	4	5	5	5	5	4	4	5	5	5	4	4	4	4	4	4	4	4	5	4	5	5	5	5	5	4	4	4	5	135	41	28	25	27	14	135
5	5	5	5	5	5	5	5	5	5	5	5	5	5	5	5	5	5	5	5	5	5	5	5	5	5	5	5	5	5	150	45	30	30	30	15	150
4	3	4	4	4	3	3	3	4	5	4	3	4	3	3	4	4	4	4	4	4	4	3	4	4	4	3	3	4	4	111	33	22	19	25	12	111
3	3	4	4	4	4	4	4	4	4	3	4	2	4	4	4	4	4	4	4	4	4	4	4	4	4	4	4	4	4	115	33	24	23	24	11	115
4	4	4	4	4	4	4	4	4	4	4	4	4	4	4	4	4	4	4	4	4	4	4	4	4	4	4	4	4	4	120	36	24	24	24	12	120
3	4	4	4	4	3	3	2	3	4	4	3	3	4	4	4	4	3	3	4	3	3	3	4	4	4	3	4	4	3	105	28	23	19	23	12	105
5	5	5	5	5	5	5	5	5	5	5	5	5	5	5	5	5	5	5	5	5	5	4	4	4	4	4	4	4	5	143	44	28	28	28	15	143
4	4	5	4	5	5	5	5	4	4	4	5	5	5	5	4	4	5	5	5	5	5	5	5	5	5	5	5	4	4	140	43	29	29	26	13	140
3	3	5	5	5	4	2	3	4	3	1	2	1	2	2	4	3	2	2	4	4	4	3	4	4	3	3	3	3	3	94	24	22	16	23	9	94
3	4	4	4	4	4	4	4	4	4	4	3	2	4	4	4	4	4	4	4	4	4	4	4	4	4	2	4	4	4	114	32	24	22	24	12	114
4	4	5	4	5	4	3	4	4	4	3	4	4	4	4	4	4	4	4	4	4	4	4	4	4	4	4	4	4	4	120	35	25	24	24	12	120
4	3	4	5	5	4	3	2	3	4	5	2	3	5	4	5	4	4	3	4	5	3	4	5	5	4	3	3	4	4	116	31	23	20	28	14	116
4	4	4	4	4	4	3	3	4	4	4	3	3	3	4	4	4	3	4	4	4	4	4	3	4	3	4	3	3	4	110	31	22	22	23	12	110
4	4	4	4	4	4	4	3	4	4	4	4	4	4	4	4	4	4	4	4	4	4	4	3	4	4	3	4	4	4	117	36	23	22	24	12	117
5	5	5	5	5	5	5	5	5	5	5	5	5	5	5	5	5	5	5	5	5	5	5	5	5	5	5	5	5	5	150	45	30	30	30	15	150
5	5	5	5	5	5	5	5	5	5	5	5	5	5	5	5	5	5	5	5	5	5	5	5	5	5	5	5	5	5	150	45	30	30	30	15	150
3	5	5	4	5	4	2	5	5	4	4	4	5	5	4	5	5	5	4	5	4	5	5	5	5	5	3	5	5	5	135	38	29	27	27	14	135
5	5	5	5	5	5	5	5	5	5	5	5	5	5	5	5	5	5	5	5	5	5	5	5	5	5	5	5	5	5	150	45	30	30	30	15	150
5	5	5	5	5	5	5	5	5	5	5	5	5	5	5	5	5	5	5	5	5	5	5	5	5	5	5	5	5	5	150	45	30	30	30	15	150
5	5	4	4	4	4	2	2	2	4	4	4	4	3	3	4	4	4	4	4	3	3	3	4	4	3	2	2	4	4	106	33	19	19	23	12	106
4	4	4	4	4	4	4	4	4	4	4	3	4	4	4	4	4	4	4	4	4	4	4	4	4	4	4	4	4	4	119	35	24	24	24	12	119
3	4	4	4	4	3	3	3	4	4	4	4	4	4	4	5	4	3	5	5	5	4	4	5	4	4	3	5	4	4	120	32	27	23	26	12	120
3	4	5	4	4	4	3	3	4	4	3	3	3	4	4	4	4	3	4	4	3	3	4	4	4	4	3	4	3	4	110	30	25	22	22	11	110
1	1	1	1	1	1	1	1	1	1	1	1	1	1	1	1	1	1	1	1	1	1	1	1	1	1	1	1	1	1	30	9	6	6	6	3	30
4	4	5	4	4	3	4	4	5	5	4	4	4	4	4	4	4	4	4	4	3	3	4	4	3	4	4	4	4	4	119	34	26	24	23	12	119
4	4	4	4	4	4	4	4	4	4	4	4	4	4	4	4	4	4	4	4	4	4	4	4	4	4	4	4	4	4	120	36	24	24	24	12	120
3	3	4	5	4	4	3	3	4	4	3	3	3	4	4	4	4	4	4	4	3	3	4	5	4	4	3	4	4	5	113	32	25	21	24	11	113
1	1	1	1	1	2	1	1	1	1	1	1	2	1	1	1	1	1	1	1	1	1	5	2	1	1	2	1	1	1	38	11	7	11	6	3	38
3	3	2	3	3	2	2	4	4	4	4	3	3	3	4	4	4	3	4	4	4	4	4	4	4	4	3	3	3	4	103	28	21	21	22	11	103
4	3	4	4	4	3	2	3	4	4	3	2	2	4	2	4	4	2	3	4	3	4	4	4	4	4	3	4	4	3	102	26	22	20	23	11	102
4	3	4	4	4	4	4	4	4	4	2	2	2	2	4	4	4	4	4	4	4	3	4	4	4	4	4	4	4	4	110	31	24	21	24	10	110
2	5	4	2	2	2	4	2	4	2	4	4	5	5	2	4	4	2	4	4	4	4	4	4	4	4	4	4	4	4	107	31	22	24	20	10	107
1	5	5	5	5	5	1	1	5	5	5	1	3	5	1	5	5	5	5	5	5	5	5	5	5	3	3	5	5	5	124	29	26	24	30	15	124
5	4	5	5	5	4	4	5	5	5	4	4	4	4	3	4	4	4	4	5	5	4	4	4	4	3	4	3	4	4	126	36	25	25	27	13	126
2	3	4	4	4	4	3	4	4	4	4	4	3	3	4	3	4	3	3	3	3	2	3	3	3	2	2	3	3	2	96	25	21	18	20	12	96
4	4	5	4	5	5	5	3	4	4	4	5	4	4	5	5	4	4	4	5	5	4	4	4	4	4	3	4	4	5	128	40	27	22	26	13	128
2	3	5	4	4	4	2	2	5	5	4	3	2	2	4	4	4	3	4	4	4	3	4	4	4	4	2	4	4	5	108	28	26	17	25	12	108
5	5	5	5	5	5	5	5	5	5	4	4	4	5	5	5	4	5	4	5	4	5	3	5	5	5	2	4	5	5	138	43	29	24	29	13	138
3	3	3	3	3	4	3	3	3	4	3	3	3	3	3	4	3	4	3	3	3	3	3	4	3	3	3	4	3	4	97	30	20	18	20	9	97
4	3	4	3	5	4	4	3	5	5	4	5	3	3	4	5	4	4	4	5	5	4	4	5	5	5	3	5	4	5	126	38	28	20	27	13	126
4	4	4	4	4	4	4	4	4	4	4	4	4	4	4	4	4	4	4	4	4	4	4	4	4	4	4	4	4	4	120	36	24	24	24	12	120
4	4	4	5	4	4	4	2	4	4	3	4	5	2	4	4	4	4	3	4	4	4	2	3	4	4	3	4	2	4	110	37	23	16	23	11	110
5	5	5	5	5	5	5	5	5	5	5	5	5	5	5	5	5	5	5	5	5	5	5	5	5	5	5	5	5	5	150	45	30	30	30	15	150
5	5	5	4	5	3	4	3	4	4	4	4	4	5	5	5	4	4	5	5	4	4	5	5	5	5	5	5	4	4	133	37	29	28	26	13	133
3	2	3	3	3	2	2	2	3	3	4	3	2	3	4	4	4	2	2	4	3	2	2	4	3	4	3	3	4	4	90	24	21	14	20	11	90
4	4	4	4	4	2	1	3	4	4	3	3	2	4	3	4	4	3	4	4	4	4	3	4	4	3	3	4	4	5	106	27	23	21	24	11	106
3	4	4	4	4	4	4	4	4	4	4	4	4	4	4	4	4	4	4	4	4	4	4	4	4	4	4	4	4	5	120	36	24	24	24	12	120
3	2	4	4	4	4	2	4	4	4	1	3	2	4	4	4	4	3	4	4	4	4	4	4	4	2	3	2	4	3	102	26	22	21	24	9	102
2	2	2	2	2	2	2	2	2	2	2	2	2	2	2	2	2	2	2	2	2	2	2	4	4	4	2	2	2	2	66	20	14	12	14	6	66
1	5	5	5	5	5	1	1	5	5	5	1	1	5	1	5	5	1	5	5	5	5	5	5	5	5	5	5	5	5	122	25	26	26	30	15	122
5	4	5	5	3	4	4	2	5	5	5	3	4	5	1	5	5	4	5	5	5	5	4	4	4	4	3	5	4	5	127	38	25	23	28	13	127
5	4	5	5	5	5	5	5	5	5	5	5	5	5	5	5	5	5	4	5	5	5	5	5	5	5	5	5	5	5	148	45	30	28	30	15	148
4	4	4	3	3	3	1	3	3	3	2	3	3	4	3	4	4	4	4	4	3	3	3	4	4	4	4	3	3	3	100	28	21	22	20	9	100
4	3	4	4	4	4	4	4	4	4	4	3	4	3	4	3	4	4	4	5	4	4	3	5	4	4	5	4	4	4	118	35	26	22	23	12	118
1	4	4	5	4	2	3	5	4	4	4	1	3	4	4	4	4	4	4	5	4	3	5	4	4	5	4	4	4	4	114	26	25	26	25	12	114
1	1	1	1	1	1	1	1	1	1	1	1	1	1	1	1	1	1	1	1	1	1	1	1	1	1	1	1	1	1	30	9	6	6	6	3	30
4	4	4	4	4	5	5	5	5	5	5	1	5	5	5	5	5	5	5	5	4	4	4	4	4	4	4	5	5	5	134	38	28	27	27	14	134
4	3	5	3	4	2	2	2	4	4	3	4	2	2	4	5	4	2	3	4	4	3	3	4	4	3	3	4	3	4	101	26	25	16	23	11	101
4	3	3	3	3	3	4	2	3	3	3	2	3	3	3	3	3	3	3	3	3	4	3	3	3	3	3	3	3	3	91	29	18	17	18	9	91
5	3	4	4	4	4	4	2	4	4	4	4	4	4	3	4	4	4	4	5	4	4	4	4	4	4	3	4	4	4	117	37	24	20	24	12	117
4	5	4	4	4	4	4	4	4	4	4	3	4	4	2	5	4	4	4	4	4	4	4	4	4	4	4	4	4	4	119	35	22	25	25	12	119
5	4	5	5	5	5	5	4	4	4	4	4	4	4	4	4	4	4	4	5	5	5	5	5	5	4	4	4	5	5	134	41	27	25	28	13	134
5	5	5	5	5	5	5	5	5	5	5	5	5	5	5	5	5	5	5	5	5	5	5	5	5	5	5	5	5	5	150	45	30	30	30	15	150
2	4	4	4	3	3	3	4	4	4	3	2	3	4	4	4	4	2	4	4	4	4	4	4	4	4	4	4	3	4	108	27	24	24	23	10	108
5	1	5	5	5	5	5	1	5	1	5	5	5	5	5	5	5	5	5	5	5	5	5	5	5	4	3	4	4	5	133	44	29	20	25	15	133
3	4	4	4	4	4	3	4	3	4	3	4	3	4	2	5	3	2	4	4	3	3	4	3	3	3	3	4	3	3	103	28	20	23	22	10	103
4	4	4	4	4	4	4	4	4	4	4	4	4	4	4	4	4	4	4	4	4	4	4	4	4	4	2	3	4	4	117	36	23	22	24	12	117
5	4	4	5	5	4	4	4	4	5	5	2	4	5	4	5	5	4	5	5	5	5	5	5	5	5	1	1	5	5	130	38	23	24	30	15	130
4	4	4	4	4	4	4	4	4	4	4	4	4	4	4	4	4	4	4	4	4	4	4	4	4	4	4	4	4	4	120	36	24	24	24	12	120
3	4	4	4	4	2	4	3	3	3	3	3	3	3	3	3	3	3	3	3	3	3	3	3	3	3	3	3	3	3	94	27	19	19	19	10	94
3	3	2	3	3	2	3	5	3	3	2	1	2	5	5	5	5	3	5	5	5	2	3	4	5	3	5	5	1	3	104	22	24	26	22	10	104
3	3	4	3	4	2	3	2	3	2	3	3	3	4	3	3	3	3	4	4	2	2	2	4	4	4	3	3	3	3	92	26	21	18	17	10	92
3	4	4	4	2	3	3	4	3	4	3	2	3	4	4	4	4	3	4	4	4	3	2	4	4	2	2	4	3	5	102	27	23	20	23	9	102
3	3	4	4	4	5	4	4	4	5	5	4	4	4	5	5	4	4	4	5	4	4	4	5	4	5	3	4	5	5	127	38	27	22	27	13	127
3	4	4	4	4	3	1	4	4	4	4	3	2	4	4	4	4	3	4	4	4	4	4	4	4	4	4	4	4	4	111	27	24	24	24	12	111
2	3	3	3	3	3	3	4	2	4	3	3	3	3	3	4	3	2	4	2	2	3	2	4	3	3	3	4	3	3	90	25	18	19	19	9	90
4	3	4	3	3	4	4	4	4	3	3	3	3	3	3	4	3	3	3	4	3	3	3	3	4	3	3	2	2	2	96	29	20	19	19	9	96
5	5	5	5	5	5	5	2	4	5	4	4	4	4	5	5	5	5	4	5	2	3	2	1	5	5	5	5	4	5	128	41	25	22	26	14	128
3	3	4	4	4	3	3	3	4	4	4	4	5	5	5	5	5	5	5	4	4	3	4	5	5	4	4	4	4	4	123	34	26	24	26	13	123
3	3	4	3	3	3	3	3	4	4	3	3	3	3	3	4	4	3	4	5	4	3	3	4	4	4	3	4	3	3	103	28	24	19	22	10	103
4	4	4	4	4	4	4	4	4	4	4	4	3	3	4	4	4	4	4	4	4	4	4	4	4	4	4	4	4	4	118	35	24	23	24	12	118
4	2	4	4	4	4	2	2	4	4	3	4	3	4	2	4	2	3	4	4	4	3	3	4	3	4	4	4	3	4	103	31	22	19	22	9	103
2	1	3	3	3	1	1	5	1	1	1	1	1	5	1	3	1	1	1	2	5	1	5	5	5	1	1	1	3	5	70	14	13	18	20	5	70
4	3	3	3	3	3	3	3	3	3	3	3	3	3	3	3	3	3	3	3	3	3	3	3	3	3	3	3	3	3	91	28	18	18	18	9	91
4	4	5	5	5	5	5	4	5	5	5	5	5	4	4	5	5	5	5	5	5	5	5	4	5	5	5	5	5	5	144	44	28	27	30	15	144
1	3	3	3	3	1	1	5	1	2	2	2	2	5	1	5	5	1	5	3	3	1	5	5	5	5	5	5	5	5	98	19	18	28	23	10	98
1	1	1	1	4	1	1	1	1	5	1	1	1	1	1	1	5	1	1	5	5	1	1	1	1	1	5	5	1	1	57	9	14	10	14	10	57
2	3	3	4	3	4	2	4	2	2	2	2	2	2	4	4	1	4	4	4	4	4	4	4	4	4	5	5	5	5	102	29	22	22	23	6	102
5	5	5	5	5	5	5	3	4	3	3	3	4	4	4	4	4	4	4	4	4	4	4	4	4	4	1	4	5	5	122	39	25	21	25	12	122
3	4	4	5	5	3	3	2	3	3	3	2	3	2	3	3	3	2	2	2	2	2	2	4	3	2	3	3	3	2	86	22	19	15	19	11	86
4	4	4	4	4	4	4	4	4	4	4	4	4	4	4	4	4	4	4	4	4	4	4	4	4	4	4	4	4	4	120	36	24	24	24	12	120
5	5	5	5	5	5	5	5	5	5	5	5	5	5	5	5	5	5	5	5	5	5	5	5	5	5	5	5	5	5	150	45	30	30	30	15	150
5	5	5	5	5	5	5	5	5	5	5	3	2	4	3	4	4	5	4	4	5	4	5	5	5	5	4	4	4	4	133	38	26	27	28	14	133
2	2	2	2	2	2	2	2	2	2	2	2	2	2	2	2	2	2	2	2	2	2	2	2	2	2	2	2	2	2	60	18	12	12	12	6	60
1	3	5	5	4	4	2	4	4	1	2	3	2	4	4	4	4	2	4	4	2	1	4	4	4	1	3	4	1	3	93	19	25	22	17	10	93
4	4	1	1	3	1	3	1	3	4	2	2	1	4	3	4	4	2	5	5	4	2	2	4	2	1	2	4	1	4	83	20	20	18	16	9	83
4	4	4	4	4	4	4	4	4	4	4	3	4	5	4	4	4	4	4	4	4	4	4	4	5	5	3	4	4	4	121	36	24	24	25	12	121
4	4	4	3	4	4	3	4	4	4	5	4	2	5	5	5	5	4	4	5	5	5	5	5	3	3	3	4	4	3	122	32	27	25	24	14	122
5	4	5	5	5	5	5	5	5	5	5	5	5	5	5	5	5	5	5	5	5	5	5	5	5	5	5	5	5	5	149	45	30	29	30	15	149
5	5	5	5	5	5	5	5	5	5	5	5	5	5	5	5	5	5	5	5	5	5	5	5	5	5	5	5	5	5	150	45	30	30	30	15	150
3	2	4	4	4	2	2	2	4	3	4	2	3	3	2	4	3	2	4	3	3	2	3	2	4	3	3	4	3	2	89	21	19	17	21	11	89
5	3	4	5	5	4	3	5	5	5	5	5	5	5	5	5	5	5	5	5	5	5	5	5	5	5	5	5	5	5	144	42	29	28	30	15	144
5	3	5	3	5	5	1	1	1	5	1	1	3	3	3	3	3	3	3	5	1	1	1	5	2	4	3	1	1	5	86	28	20	14	15	9	86
4	4	4	5	5	4	4	4	4	5	5	3	4	4	4	4	5	4	4	4	4	4	4	4	4	4	3	5	3	5	124	36	25	23	25	15	124
3	3	4	3	3	3	3	2	4	2	3	2	4	4	4	4	4	2	3	4	3	4	4	4	3	4	3	4	3	4	100	29	24	19	18	10	100
3	2	4	4	4	1	2	2	2	4	2	1	2	5	4	4	4	1	2	4	4	2	3	5	3	3	3	3	4	4	91	19	22	17	23	10	91
5	4	5	5	4	5	5	5	4	4	4	4	4	4	4	4	4	4	4	4	4	4	4	4	4	4	4	4	4	4	126	39	25	25	25	12	126
4	3	4	4	4	3	3	2	4	4	3	4	2	4	4	4	4	3	4	4	4	3	3	4	3	4	2	4	4	4	106	30	24	18	23	11	106
4	4	5	5	5	3	3	3	4	5	4	3	3	3	4	4	4	3	4	5	4	4	3	4	5	4	4	4	2	3	115	30	26	21	25	13	115
3	3	3	4	4	4	3	2	4	4	3	4	3	3	2	3	4	3	4	4	3	3	4	4	3	3	3	4	3	4	101	30	21	19	20	11	101
1	3	3	4	3	3	1	4	4	4	3	4	1	2	3	4	5	3	4	5	5	3	5	5	5	3	4	3	4	4	105	23	23	22	26	11	105
5	5	5	5	5	5	5	5	5	5	5	5	5	5	5	5	5	5	5	5	5	5	5	5	5	5	5	5	5	5	150	45	30	30	30	15	150
4	4	4	4	4	3	3	2	4	4	4	4	4	4	4	5	5	4	5	4	4	4	5	4	5	4	4	2	4	4	119	34	22	24	26	13	119
5	5	5	5	5	5	5	5	5	5	5	5	5	5	5	5	5	5	5	5	5	5	5	5	5	5	5	5	5	5	150	45	30	30	30	15	150
4	4	3	4	3	5	4	3	3	4	3	4	4	3	4	4	4	5	4	4	4	4	4	2	4	4	3	3	4	5	113	39	19	21	24	10	113
3	3	3	3	3	2	2	2	2	2	2	2	2	2	2	2	2	1	3	2	2	2	1	1	1	1	2	3	3	3	64	18	13	13	13	7	64
4	4	5	5	5	5	4	4	5	4	5	5	3	5	5	5	4	3	4	5	4	3	2	5	4	5	4	5	4	5	130	37	30	23	26	14	130
2	2	4	4	4	3	2	1	4	4	3	2	2	3	4	4	3	3	3	4	3	3	2	4	3	3	2	4	2	4	91	24	24	13	20	10	91
4	4	4	4	4	4	4	4	5	4	4	4	4	4	4	4	4	4	3	4	3	3	3	4	4	3	3	4	3	4	114	34	25	21	22	12	114
2	3	3	3	3	3	1	3	1	1	1	3	1	3	3	4	3	1	3	4	4	1	1	4	4	1	1	1	3	3	72	16	16	14	19	7	72
1	5	5	5	5	5	5	5	5	5	5	5	5	5	5	5	5	5	5	5	5	5	5	5	5	5	5	5	5	5	146	41	30	30	30	15	146
2	3	4	4	4	3	3	4	4	4	3	3	2	3	4	4	4	3	3	4	4	3	4	4	4	3	3	4	2	3	102	25	24	20	22	11	102
5	4	4	4	4	5	5	4	4	4	5	4	4	5	4	5	5	5	5	5	5	5	5	4	4	4	4	4	5	5	135	42	25	27	27	14	135
1	1	5	5	5	5	5	5	5	5	5	2	1	5	1	5	5	5	5	5	5	5	5	5	5	5	5	5	5	5	131	34	26	26	30	15	131
4	3	5	4	4	4	2	4	5	5	5	4	4	4	5	5	5	5	5	5	5	5	5	5	5	5	5	5	5	5	137	38	30	26	29	14	137
5	5	5	4	3	5	4	5	5	5	5	4	4	4	5	5	4	5	4	4	5	4	4	4	5	4	5	5	5	5	136	40	28	27	29	12	136
5	4	5	4	5	5	5	5	5	5	5	4	5	5	5	5	5	5	5	5	5	5	1	5	5	5	2	5	5	5	140	44	30	22	29	15	140
2	3	4	4	4	3	4	4	3	3	3	4	4	4	4	4	4	4	4	3	3	3	3	3	4	3	4	4	3	4	106	31	21	22	21	11	106
4	3	4	3	4	4	4	3	4	4	4	3	3	4	3	4	4	4	3	4	4	4	4	4	4	3	3	3	3	3	108	32	22	20	22	12	108
4	4	4	4	4	4	3	3	4	4	4	4	3	3	4	4	4	4	3	4	4	4	4	4	4	4	3	4	4	4	114	34	24	20	24	12	114
4	4	5	5	5	5	5	3	4	5	5	4	4	4	4	5	5	5	4	5	4	4	4	5	5	5	5	5	5	5	137	41	28	24	29	15	137
4	4	4	4	4	3	3	3	4	4	4	4	4	3	3	3	4	3	3	4	4	4	4	4	4	4	3	4	3	4	110	33	23	20	22	12	110
5	4	5	5	5	4	5	4	5	4	4	4	4	4	5	4	4	4	4	5	4	4	5	3	4	4	3	4	4	4	127	38	27	24	25	13	127
3	4	5	4	5	2	4	2	4	4	4	5	4	4	4	4	5	4	3	4	4	4	4	4	4	4	4	4	4	4	118	34	25	21	24	14	118
3	3	4	2	2	2	2	2	4	3	4	3	2	2	2	4	4	2	2	4	4	3	3	2	4	3	2	4	3	4	88	24	20	14	20	10	88
3	3	3	3	3	3	3	3	3	3	3	3	3	3	3	3	3	3	3	3	3	3	3	3	3	3	3	3	3	3	90	27	18	18	18	9	90
4	4	4	4	4	4	4	4	4	4	4	4	4	4	4	4	4	4	4	4	4	4	4	4	4	4	3	4	4	4	119	36	24	23	24	12	119
4	4	4	4	4	4	4	4	4	3	3	3	3	3	3	3	3	3	3	3	3	3	3	3	3	3	3	3	3	3	99	30	20	20	19	10	99
5	5	5	5	4	4	5	5	5	5	5	5	5	5	5	5	5	5	5	5	5	5	5	5	5	5	5	5	5	5	148	44	30	30	30	14	148
4	4	5	5	2	2	1	4	4	4	4	4	4	4	4	5	5	4	4	5	2	4	4	5	5	5	4	5	4	5	121	33	28	24	25	11	121
4	4	5	4	4	4	3	4	5	5	5	3	2	4	4	5	5	4	5	5	4	4	3	4	5	5	4	4	5	4	126	33	27	24	28	14	126
4	4	3	3	4	4	4	4	4	4	3	4	4	4	4	4	4	3	4	4	4	4	4	4	3	4	4	4	4	4	115	35	23	24	22	11	115
1	3	4	4	4	4	4	1	4	4	3	4	4	4	1	5	4	4	4	5	5	4	4	4	5	5	4	4	5	5	116	35	22	20	28	11	116
3	3	3	4	4	3	4	3	4	3	3	3	3	4	4	4	4	4	4	4	3	3	3	4	4	4	3	3	4	4	106	31	22	20	22	11	106
4	4	5	5	5	5	5	5	5	5	5	5	5	5	5	5	5	5	5	5	5	5	5	5	5	5	5	5	5	5	148	44	30	29	30	15	148
3	4	4	4	4	3	1	3	2	3	3	4	3	4	3	3	3	2	3	4	1	1	2	3	5	2	1	5	3	5	91	24	21	17	19	10	91
5	5	5	5	5	5	4	4	5	5	5	5	4	4	4	5	4	5	4	5	4	4	4	5	5	5	3	5	5	5	138	42	29	24	29	14	138
2	3	4	5	5	4	5	4	4	5	5	2	3	3	4	4	4	4	4	4	5	5	5	5	5	4	2	4	4	5	122	34	25	21	28	14	122
5	5	5	5	5	5	5	5	5	4	5	5	5	5	5	5	5	5	5	5	5	5	5	5	5	5	5	5	5	5	149	45	30	30	29	15	149
5	5	5	5	5	5	5	5	5	5	5	5	5	5	1	5	5	5	5	5	5	5	5	5	5	5	1	5	5	5	142	45	26	26	30	15	142
4	4	4	4	4	4	4	2	3	5	4	4	3	4	4	4	4	3	5	4	4	4	3	4	4	4	4	5	4	4	117	34	24	22	25	12	117
5	5	5	5	5	5	5	5	5	5	5	5	5	5	5	5	5	5	5	5	5	5	5	5	5	5	5	5	5	5	150	45	30	30	30	15	150
2	3	4	3	4	4	3	3	4	4	3	3	3	4	3	4	3	3	3	4	4	3	3	4	4	4	4	4	4	4	105	29	23	20	23	10	105
5	5	5	5	5	5	5	5	5	5	5	5	5	5	5	5	5	5	5	5	5	5	5	5	5	5	5	5	5	5	150	45	30	30	30	15	150
5	5	5	5	5	5	5	5	5	5	5	5	5	5	1	5	5	5	5	5	5	5	5	5	5	5	5	5	5	5	146	45	26	30	30	15	146
4	2	4	4	5	4	3	2	4	4	4	4	4	3	4	4	4	4	4	4	4	4	4	4	4	4	1	4	4	4	112	35	24	16	24	13	112
4	3	5	4	4	4	4	4	4	4	4	5	5	3	4	4	4	4	4	4	4	4	2	4	3	4	2	2	3	4	113	38	23	18	22	12	113
3	4	3	3	3	3	3	4	4	3	3	3	3	3	4	3	3	3	3	3	4	3	3	3	3	4	3	3	3	3	96	28	20	20	19	9	96
3	3	2	4	3	4	2	3	4	4	2	4	3	3	3	4	4	4	3	4	4	4	4	4	4	3	2	4	4	5	104	32	21	18	24	9	104
3	4	4	4	4	4	3	3	3	3	3	4	3	4	4	4	4	3	3	4	3	3	4	5	4	4	4	4	4	4	110	31	24	22	22	11	110
3	3	4	3	3	2	1	1	4	1	1	4	1	3	1	1	1	1	1	4	1	1	1	4	3	2	1	1	1	1	59	16	18	10	10	5	59
4	4	4	4	5	3	4	2	5	4	5	3	4	4	5	4	4	3	4	4	4	3	4	4	4	4	3	4	4	3	116	31	26	21	24	14	116
3	4	4	4	5	4	3	4	4	4	4	4	4	4	4	5	5	3	4	5	5	4	2	5	4	4	1	2	4	4	116	33	24	19	26	14	116
4	3	4	4	4	3	2	1	5	4	1	4	1	2	1	3	2	4	3	5	4	3	2	5	2	3	2	4	2	4	91	28	24	13	19	7	91
2	3	5	5	3	3	2	3	3	3	3	3	3	3	3	3	3	3	3	3	3	3	3	3	3	3	3	3	3	3	92	25	20	18	20	9	92
5	4	5	5	4	5	4	2	4	5	4	3	5	5	4	5	5	5	5	5	5	4	4	4	5	5	2	4	5	5	132	41	26	22	30	13	132
4	4	4	4	4	4	4	4	4	4	4	4	4	4	4	4	4	4	4	4	4	4	4	4	4	4	4	4	4	4	120	36	24	24	24	12	120
5	5	5	5	5	5	5	5	5	5	5	5	5	5	5	5	5	5	5	5	5	5	5	5	5	5	5	5	5	5	150	45	30	30	30	15	150
4	4	5	5	5	4	3	4	3	4	4	3	3	4	4	4	4	4	4	4	4	4	4	4	4	4	4	4	4	4	119	33	24	24	25	13	119
4	4	5	4	5	4	3	4	5	5	5	4	3	4	3	5	5	4	3	5	4	4	4	3	4	4	3	5	5	5	125	35	26	22	27	15	125
4	4	4	4	3	4	3	4	4	4	2	4	3	4	3	4	4	4	4	5	5	4	4	5	5	4	3	5	4	5	119	35	26	23	26	9	119
3	4	5	4	4	2	4	2	5	5	5	4	4	3	3	3	4	2	4	4	4	3	4	4	4	3	2	4	3	4	109	29	25	19	23	13	109
5	5	4	5	5	4	4	3	4	5	5	3	2	3	5	5	5	3	4	5	5	5	3	5	5	5	4	5	5	5	131	36	28	22	30	15	131
3	3	3	4	4	3	3	3	3	3	4	3	3	3	3	4	3	3	3	4	3	3	4	3	3	4	3	3	3	3	97	28	19	19	20	11	97
5	3	5	3	5	5	5	5	5	5	3	5	3	3	3	3	3	5	3	4	3	3	3	4	3	3	3	3	3	3	112	37	24	20	20	11	112
4	4	4	4	4	4	3	4	4	4	4	3	3	4	4	4	4	4	4	4	4	4	4	4	4	3	4	4	4	4	116	32	24	24	24	12	116
4	3	4	4	4	3	1	3	4	4	2	2	2	4	3	4	2	2	4	4	4	3	4	5	4	4	3	4	3	5	102	26	24	21	23	8	102
3	3	5	4	4	4	3	3	5	4	2	2	3	4	4	4	3	3	4	4	3	4	4	4	4	4	3	4	3	4	108	30	26	21	22	9	108
3	3	4	4	3	3	3	4	4	4	4	3	3	3	3	4	3	4	4	4	3	3	3	3	4	3	4	4	3	4	104	29	22	21	22	10	104
4	4	4	4	4	4	4	3	3	3	3	3	3	3	3	3	3	3	3	3	3	3	3	3	3	3	3	3	3	3	97	30	19	19	19	10	97
5	4	5	5	5	5	5	5	5	5	5	5	4	4	5	5	5	5	5	5	5	5	5	5	5	5	5	5	5	5	147	44	30	28	30	15	147
5	5	5	5	5	5	5	5	5	5	5	3	5	5	5	5	5	3	5	5	4	5	5	5	5	4	3	5	4	5	141	40	30	28	28	15	141
4	4	4	4	4	4	4	5	5	5	4	3	4	4	1	1	4	3	3	4	3	4	4	3	4	4	4	4	4	4	112	34	21	24	21	12	112
3	3	5	5	3	3	3	2	3	3	4	3	3	3	4	4	3	3	3	3	3	3	3	3	3	3	3	3	3	3	96	27	21	17	21	10	96
1	3	3	3	4	4	3	3	4	4	4	5	3	4	4	4	4	3	4	4	4	3	3	4	3	3	3	4	3	4	105	29	23	20	21	12	105
4	4	4	4	4	2	3	2	3	4	4	2	4	4	4	4	4	3	4	4	4	3	4	4	4	4	4	4	4	4	110	29	23	22	24	12	110
4	4	4	4	4	4	3	3	3	2	3	4	4	3	2	3	4	4	4	4	4	4	2	2	4	4	2	2	4	5	103	36	17	18	21	11	103
3	4	4	4	4	3	2	4	4	4	5	2	2	3	4	3	4	3	3	4	3	3	4	4	4	3	3	4	4	4	105	25	24	21	22	13	105
5	5	5	5	5	5	5	5	5	5	5	5	5	5	5	5	5	5	5	5	5	5	5	5	5	5	5	5	5	5	150	45	30	30	30	15	150
4	3	5	5	5	5	5	5	5	5	5	5	4	4	4	5	5	5	4	5	5	5	3	5	4	4	3	4	5	5	136	42	28	22	29	15	136
5	5	5	5	5	5	5	5	5	5	5	5	5	5	5	5	5	5	5	5	5	5	5	5	5	5	5	5	5	5	150	45	30	30	30	15	150
2	5	5	5	5	4	4	2	5	5	5	4	3	3	4	5	5	5	5	5	5	4	5	5	5	5	3	5	3	5	131	36	29	23	28	15	131
4	4	4	4	4	4	4	4	4	4	4	4	4	4	4	4	4	4	4	4	4	4	4	4	4	4	4	4	4	4	120	36	24	24	24	12	120
5	4	5	5	5	1	1	5	5	5	5	1	1	5	1	5	5	1	5	5	5	5	5	5	5	1	5	5	5	1	117	17	26	29	30	15	117
2	4	4	4	4	4	4	4	4	4	4	4	3	4	4	4	4	4	3	4	4	4	3	4	4	4	4	4	4	4	115	33	24	22	24	12	115
5	4	5	5	5	5	4	4	5	5	5	5	5	5	4	5	5	5	4	5	3	4	5	5	5	5	4	5	5	5	141	43	29	26	28	15	141
4	3	4	4	4	4	4	3	4	4	4	4	4	4	4	4	4	4	4	4	4	4	4	4	3	4	4	4	4	4	117	36	24	22	23	12	117
3	3	4	5	4	4	3	3	4	5	5	4	3	4	4	4	4	4	4	4	4	4	4	4	4	4	3	3	4	5	117	34	23	21	26	13	117
4	4	4	4	4	3	3	3	4	3	3	3	3	3	4	3	3	3	3	4	3	3	3	4	3	3	3	4	3	4	101	29	24	19	19	10	101
4	3	3	3	3	4	4	3	3	3	3	4	4	4	4	4	4	4	3	4	4	4	4	4	4	4	3	4	4	4	110	36	22	20	22	10	110
2	2	2	2	2	3	2	3	3	3	3	3	3	3	3	3	3	3	3	3	3	3	3	3	3	3	3	3	3	3	84	25	17	17	17	8	84
5	1	5	5	5	5	1	5	5	5	5	5	1	5	5	5	5	5	1	5	5	5	1	5	5	5	5	5	5	5	130	37	30	18	30	15	130
4	3	5	4	4	4	2	4	5	4	4	3	2	4	4	4	4	4	5	5	5	5	5	5	5	5	5	5	5	5	128	34	29	26	27	12	128
4	3	4	4	4	2	1	4	4	4	4	2	2	4	3	4	4	2	4	4	4	4	4	4	4	3	4	4	3	3	104	23	23	23	23	12	104
5	5	5	4	5	4	4	4	4	4	4	4	4	4	4	4	4	2	3	5	4	4	4	4	4	4	4	4	4	4	122	35	26	24	24	13	122
5	5	5	5	5	5	5	5	5	5	5	5	5	5	5	5	5	5	5	5	4	5	4	4	5	5	3	4	4	4	142	44	28	27	28	15	142
2	2	2	2	5	3	1	3	2	3	5	2	2	3	4	3	4	3	3	4	3	3	3	3	3	2	3	4	3	2	87	20	19	17	17	14	87
1	1	1	1	1	1	1	1	1	1	1	1	1	1	1	1	1	1	1	1	1	1	1	1	1	1	1	1	1	1	30	9	6	6	6	3	30
1	2	4	5	4	2	2	5	5	2	3	2	2	4	3	4	4	2	2	5	4	2	4	1	2	2	2	4	4	3	91	18	22	19	21	11	91
5	1	5	5	5	5	5	5	5	5	5	1	1	5	1	5	5	5	1	5	5	5	5	5	5	5	1	5	5	5	126	37	26	18	30	15	126
4	4	5	5	5	4	4	3	5	5	5	4	5	5	3	5	5	4	4	5	5	5	5	5	5	5	4	2	4	5	134	40	25	25	29	15	134
4	4	5	5	5	4	4	3	5	5	5	4	5	4	3	5	5	4	4	5	5	5	5	5	5	5	3	3	4	5	133	40	26	23	29	15	133
5	5	5	5	5	5	5	5	5	5	5	5	5	5	5	5	5	5	5	5	5	5	5	5	5	5	2	5	5	5	147	45	30	27	30	15	147
3	3	3	3	3	3	3	3	3	4	4	4	3	3	4	4	4	3	4	4	4	3	3	4	4	3	3	4	3	4	103	29	22	19	22	11	103
4	4	5	4	5	5	4	5	5	5	5	5	5	5	5	5	5	5	5	5	5	5	5	5	5	5	2	5	5	5	143	43	30	26	29	15	143
5	5	5	5	4	3	5	4	4	5	5	3	5	5	5	5	5	5	5	5	5	5	5	5	5	5	5	5	5	5	143	41	29	29	30	14	143
4	4	5	4	4	3	3	3	4	4	3	3	3	3	4	4	4	3	3	5	4	4	4	4	4	4	4	4	3	4	112	31	26	21	23	11	112
4	4	4	4	4	4	4	4	4	4	4	4	3	4	4	4	4	4	4	4	4	4	4	4	4	4	4	4	4	4	119	35	24	24	24	12	119
4	5	5	4	5	5	4	5	4	4	4	3	4	5	3	5	4	4	4	4	4	4	3	5	5	4	4	5	3	5	127	37	26	26	25	13	127
5	5	5	5	1	5	5	5	5	5	5	1	5	5	5	5	5	5	5	5	5	5	5	5	5	5	2	1	5	5	135	41	26	27	30	11	135
5	5	5	5	5	5	5	5	5	5	5	5	5	5	5	5	5	5	5	5	5	5	5	5	5	5	5	5	5	5	150	45	30	30	30	15	150
4	4	5	4	4	4	4	4	4	4	4	3	4	4	4	4	4	4	4	4	4	4	4	5	4	4	4	4	4	4	121	35	26	24	24	12	121
5	3	5	5	5	5	5	4	5	5	4	4	4	3	4	4	4	4	4	5	5	5	5	5	5	5	4	5	4	4	134	41	29	23	28	13	134
5	5	5	5	5	5	5	2	5	5	5	5	3	5	5	5	4	5	4	5	3	5	5	2	4	4	3	2	3	5	129	42	24	24	25	14	129
5	5	5	5	5	5	5	5	5	5	5	5	5	5	5	5	5	5	5	5	5	5	5	5	5	5	5	5	5	5	150	45	30	30	30	15	150
3	3	5	3	4	3	2	2	4	4	4	3	3	3	3	4	4	3	4	3	3	3	3	4	5	3	3	5	3	3	102	26	24	18	22	12	102
5	5	5	4	5	4	4	4	4	5	4	4	4	4	4	5	5	5	5	4	5	5	5	5	5	5	4	5	5	5	138	41	27	27	29	14	138
3	3	4	4	4	4	2	3	3	3	4	3	3	3	3	3	3	3	3	4	3	3	3	2	4	3	3	4	4	4	98	28	20	18	21	11	98
4	4	5	4	4	4	3	2	4	4	3	3	4	3	2	4	4	3	4	4	4	4	4	4	4	4	2	4	4	4	110	33	23	19	24	11	110
4	4	4	4	4	4	4	4	4	4	4	1	4	4	4	4	4	4	4	4	4	4	4	4	4	4	4	1	4	4	114	33	21	24	24	12	114
4	3	4	4	4	4	4	4	4	4	3	3	3	4	4	4	3	3	3	4	4	4	3	4	4	4	3	3	3	4	109	33	23	20	23	10	109
4	3	4	3	4	4	4	4	3	4	4	3	4	4	4	4	4	3	4	4	4	4	4	3	4	4	4	3	4	4	113	34	21	23	23	12	113
5	4	5	5	5	5	5	3	5	5	4	4	5	3	4	5	5	5	5	5	5	5	5	5	5	5	5	5	5	5	142	44	29	25	30	14	142
5	5	5	5	5	2	1	3	4	5	1	3	1	2	3	5	5	1	2	5	5	5	1	5	5	5	5	5	5	3	112	26	27	18	30	11	112
2	2	4	2	2	2	2	2	2	2	2	3	3	3	2	2	3	2	2	2	2	3	2	3	3	3	3	4	3	4	76	24	17	14	14	7	76
4	3	5	5	5	4	4	4	4	4	3	3	3	4	4	5	4	4	4	4	4	4	4	4	4	4	4	4	4	4	120	34	25	23	26	12	120
3	2	3	3	4	4	4	4	4	4	5	4	3	4	4	4	4	3	3	5	4	4	3	4	4	4	3	4	4	4	112	33	24	19	23	13	112
4	3	5	4	4	3	3	2	4	4	4	2	2	4	5	5	5	3	4	4	4	3	4	4	4	4	3	5	4	4	113	28	27	20	25	13	113
5	4	5	5	5	3	4	4	5	5	4	2	3	4	4	4	4	3	3	4	3	4	4	5	5	4	3	4	4	5	121	33	27	22	26	13	121
5	5	5	5	5	5	5	5	5	5	5	5	5	5	5	5	5	5	5	5	5	5	5	5	5	5	5	5	5	5	150	45	30	30	30	15	150
4	4	5	4	4	3	3	3	5	4	5	4	3	5	4	5	4	4	5	5	5	3	5	5	4	4	4	5	4	5	127	33	29	26	26	13	127
5	4	5	5	5	5	5	5	5	5	5	5	5	5	5	5	5	5	5	5	5	5	5	5	5	5	5	5	5	5	149	45	30	29	30	15	149
2	5	4	4	4	4	2	5	5	2	4	3	4	4	2	4	4	2	5	5	4	2	4	4	5	4	4	2	2	4	109	27	22	27	21	12	109
4	3	5	4	5	4	3	3	4	4	4	4	3	4	4	5	4	4	3	4	4	4	4	4	4	4	3	4	4	4	117	34	25	20	25	13	117
2	3	3	4	4	2	3	3	3	2	2	3	4	4	4	4	4	2	4	4	4	3	2	1	4	3	1	3	4	4	93	26	18	17	22	10	93
4	4	5	5	5	4	5	4	5	5	5	4	5	5	5	5	5	5	5	5	4	5	5	5	5	5	4	5	5	5	143	42	30	27	29	15	143
2	3	5	2	4	2	1	3	3	3	3	3	3	3	3	4	4	2	4	3	4	2	3	3	4	3	2	3	3	4	91	22	20	18	20	11	91
5	3	4	4	3	5	4	4	4	4	4	4	4	4	4	4	4	5	3	4	4	4	4	4	4	4	2	4	5	4	119	39	24	20	25	11	119
4	4	4	4	4	4	4	4	4	4	4	3	3	4	4	5	5	4	4	4	4	4	4	4	4	4	4	4	4	4	120	34	24	24	25	13	120
3	3	4	4	4	4	3	3	4	4	4	4	3	4	4	4	4	4	4	4	4	4	4	4	4	4	4	4	4	4	115	33	24	22	24	12	115
5	5	5	5	5	5	4	5	5	5	5	5	5	5	5	5	5	5	4	5	5	5	5	5	5	5	4	5	5	5	147	44	30	28	30	15	147
3	3	4	4	4	4	4	4	5	5	5	5	4	5	5	5	5	5	4	4	4	4	4	5	5	5	4	4	5	5	132	39	27	24	28	14	132
3	3	3	3	3	3	3	3	3	3	3	3	3	3	3	3	3	3	3	3	3	3	3	3	3	3	3	5	3	3	92	27	20	18	18	9	92
4	4	4	4	4	4	4	4	4	4	4	4	4	4	4	4	4	4	4	4	4	4	4	4	4	4	4	4	4	4	120	36	24	24	24	12	120
2	3	4	2	3	3	3	2	5	2	3	3	3	4	4	3	3	3	3	5	2	2	2	4	3	3	1	5	1	4	90	26	27	15	13	9	90
5	4	5	4	5	5	4	4	5	5	4	4	5	5	4	5	5	5	5	5	5	5	5	5	5	5	5	5	5	5	143	43	29	28	29	14	143
4	4	4	4	5	4	4	2	4	4	5	4	3	4	4	4	4	4	4	4	4	4	4	4	5	4	4	4	4	4	120	35	24	22	25	14	120
5	5	5	5	5	5	5	5	5	5	5	5	5	5	5	5	5	5	5	5	5	5	5	5	5	5	5	5	5	5	150	45	30	30	30	15	150
5	5	5	5	5	5	5	5	5	5	5	5	5	5	5	5	5	5	5	5	5	5	5	5	5	5	5	5	5	5	150	45	30	30	30	15	150
4	4	4	4	4	4	4	4	4	4	4	4	4	4	4	4	4	4	4	4	4	5	4	4	4	4	4	5	5	5	124	38	25	24	25	12	124
5	5	5	5	5	5	5	5	5	5	5	5	5	5	5	5	5	5	5	5	5	5	5	5	5	5	5	5	5	5	150	45	30	30	30	15	150
4	4	4	4	4	4	4	4	4	4	4	5	5	5	5	5	5	5	4	5	4	4	4	5	5	5	2	4	4	4	129	40	27	23	26	13	129
4	5	5	4	5	4	4	4	5	5	5	4	4	4	4	4	4	4	4	5	4	4	4	4	4	4	4	4	4	4	127	36	27	25	25	14	127
4	4	4	4	4	4	4	4	4	4	4	4	4	4	4	4	4	4	4	4	4	4	4	4	4	4	4	4	4	4	120	36	24	24	24	12	120
5	5	5	5	5	5	5	5	5	5	5	5	5	5	1	5	5	5	5	5	5	5	5	5	1	5	5	5	5	5	142	45	26	30	26	15	142
5	5	5	5	5	5	1	2	5	2	1	2	5	4	5	5	5	5	5	5	4	5	2	5	5	5	1	4	5	5	123	38	29	19	26	11	123
5	5	5	5	5	5	5	5	5	5	5	5	5	5	5	5	5	5	5	5	5	5	5	5	5	5	5	5	5	5	150	45	30	30	30	15	150
5	4	4	5	4	4	4	5	4	4	4	2	4	4	4	5	5	4	4	5	4	4	4	4	4	2	2	3	4	5	120	34	24	23	26	13	120
4	4	5	5	4	3	3	4	4	4	4	4	4	4	3	4	4	4	4	4	3	3	4	4	4	4	3	4	4	4	116	33	24	23	24	12	116
3	3	4	3	4	4	3	4	4	4	4	3	3	3	3	4	4	4	3	4	4	4	4	4	4	3	3	4	4	4	109	31	23	20	23	12	109
4	4	4	4	4	3	3	4	3	4	4	3	3	4	5	4	4	4	4	4	4	4	4	4	4	4	4	4	4	4	116	32	24	24	24	12	116
5	4	5	5	5	5	5	4	5	5	5	4	5	4	5	5	5	5	4	5	4	5	4	4	4	5	4	3	5	5	138	44	27	24	28	15	138
4	4	4	4	4	4	2	4	4	4	4	3	4	4	2	4	4	4	3	4	4	3	4	4	4	4	4	4	3	4	112	32	22	23	23	12	112
4	4	4	4	4	4	3	4	4	4	4	4	4	4	1	3	3	2	3	3	3	4	4	5	4	4	3	3	4	3	107	32	20	22	22	11	107
1	2	4	4	4	3	3	3	3	3	3	3	3	3	1	2	2	3	3	4	3	3	3	5	3	4	2	1	2	4	87	27	18	16	17	9	87
5	4	4	4	4	3	3	4	4	4	3	3	3	5	4	4	4	4	4	5	5	4	4	4	4	4	4	4	4	4	119	33	25	25	25	11	119
4	3	5	5	5	4	3	4	5	4	5	3	3	4	4	4	4	3	4	4	4	4	4	4	4	4	4	4	3	4	119	32	26	23	24	14	119
2	3	3	3	3	3	2	3	3	3	2	3	3	3	3	3	3	2	3	3	3	3	3	4	3	3	3	3	3	3	87	24	19	18	18	8	87
4	4	4	4	4	4	4	3	4	4	4	4	3	5	5	5	5	5	4	5	5	5	4	5	5	5	3	4	5	5	130	39	27	23	28	13	130
4	4	4	3	3	4	3	4	3	4	4	4	4	4	4	4	4	4	4	3	4	3	3	4	4	3	3	4	5	5	113	34	22	22	24	11	113
2	2	2	3	4	2	2	4	2	3	5	3	2	4	4	2	3	4	4	4	2	2	4	4	4	3	3	4	4	4	95	24	20	21	18	12	95
3	2	4	4	3	3	2	4	2	4	4	3	2	4	4	4	3	3	4	4	3	3	4	4	4	3	3	4	3	4	101	26	22	21	22	10	101
5	5	5	5	5	5	5	5	5	4	4	4	3	5	4	4	5	4	5	4	5	3	4	4	3	5	4	3	4	4	130	38	25	28	25	14	130
5	5	5	5	5	5	4	5	4	4	4	5	4	4	4	5	4	4	4	5	4	3	4	3	4	4	3	4	5	4	128	38	25	25	27	13	128
2	3	4	3	3	3	3	3	3	3	4	3	4	4	3	4	4	4	4	4	3	3	4	3	4	4	4	4	4	3	104	29	21	22	21	11	104
2	3	3	3	4	2	3	3	3	3	3	4	4	3	4	4	4	4	4	4	4	3	3	3	4	3	3	4	3	3	100	28	21	19	21	11	100
4	4	5	4	5	4	3	4	4	4	3	3	4	4	4	5	4	5	5	5	5	4	4	4	4	4	3	4	4	5	124	36	26	24	26	12	124
																														114.9	20.1754

## Sheet: Maslach burnout inventory (MBI)
80.Work sometimes makes me feel down	81.I feel very tired after working all day	82.When I wake up in the morning, I feel very tired, but I still have to face the work that day	83.I can put myself in the place and experience the feelings of the patient	84.I sometimes feel that facing the patient is like facing an object	85.Working with people all day makes me feel very tired	86.I can effectively deal with various problems in the patient care process	87.Work exhausted me	88.I feel that my work has played a positive role in the lives of others	89.Since I started this job, I have become more and more indifferent to people	90.I am worried that this job will make me a hard-hearted person	91.I feel energetic	92.I feel frustrated at work	93.I feel my work is too hard	94.I don't pay much attention to the various needs of patients	95.Working with other people makes me feel a lot of pressure	96.I can easily create a relaxed atmosphere with patients	97.Close contact with patients at work makes me feel satisfied and happy	98.Engaging in nursing work makes me experience my own value	99.I feel my emotions have reached the point of being exhausted	100.I can calmly deal with the emotional distress encountered at work	101.I think some patients blame me for the problems they should face		Emotional exhaustion	Personification	Personal accomplishment	Job burnout scores
3	4	4	5	3	4	3	4	4	3	3	3	3	3	3	4	4	3	4	4	3	3		33	15	27	75
4	4	4	6	1	1	6	4	6	1	1	6	1	4	1	1	4	6	6	1	4	4		24	8	12	44
6	6	6	6	3	2	6	6	6	1	1	4	6	6	2	3	5	3	3	5	5	6		46	13	18	77
1	2	1	6	1	1	4	1	6	1	1	6	1	1	1	1	6	6	6	1	6	1		10	5	10	25
4	6	6	5	3	5	5	4	6	5	5	3	4	5	2	2	4	3	4	5	5	5		41	20	21	82
2	2	2	1	2	2	1	2	1	1	1	1	2	2	1	2	1	2	1	3	2	3		19	8	46	73
5	6	6	6	2	4	5	6	5	4	3	3	4	6	3	3	4	3	4	4	4	1		44	13	22	79
2	2	2	4	3	2	3	1	3	1	1	5	2	2	1	2	5	5	2	1	5	1		16	7	24	47
2	4	2	6	1	1	6	2	1	1	1	6	1	2	1	1	5	6	6	1	2	2		16	6	18	40
5	2	1	6	1	1	5	2	3	1	1	5	2	6	1	2	5	5	5	1	6	2		22	6	16	44
2	2	2	6	1	1	6	1	6	1	1	6	1	2	2	1	6	6	6	1	2	2		13	7	12	32
4	4	4	6	1	2	6	4	6	2	2	6	2	2	2	2	4	4	4	2	6	2		26	9	14	49
2	2	2	6	1	2	4	1	5	1	5	5	4	2	2	2	4	5	5	1	5	4		18	13	17	48
3	4	4	3	4	3	5	3	5	6	6	5	4	6	3	3	3	4	3	3	3	5		33	24	25	82
2	2	1	6	1	1	6	6	6	1	1	6	2	2	1	2	2	4	2	1	2	2		19	6	22	47
2	2	1	6	1	1	6	2	6	1	1	6	2	2	1	2	6	5	6	1	6	1		15	5	9	29
3	5	5	5	5	5	5	5	5	3	2	5	2	5	5	4	4	5	4	4	4	5		38	20	19	77
2	3	3	3	4	3	3	3	3	3	3	2	3	2	3	3	3	3	2	2	3	2		24	15	34	73
4	4	4	5	3	4	5	4	4	1	1	6	2	4	1	1	6	4	6	1	6	2		28	8	14	50
2	4	4	4	4	4	2	4	4	4	5	3	5	6	4	4	3	2	3	6	5	5		39	22	30	91
4	4	4	6	1	4	4	4	4	1	1	4	3	2	1	1	4	6	6	1	6	4		27	8	16	51
2	4	4	4	4	4	2	4	4	4	5	3	5	6	4	4	3	2	3	6	5	5		39	22	30	91
3	5	5	6	1	6	2	2	6	1	2	2	2	2	1	1	2	4	1	2	2	2		28	7	31	66
6	6	6	6	1	4	6	6	1	6	6	6	6	6	1	2	6	2	1	6	6	1		48	15	22	85
3	6	5	6	2	5	6	5	5	2	2	3	4	6	1	2	5	4	2	4	4	2		40	9	21	70
2	4	1	6	1	1	6	2	4	1	1	6	2	1	1	1	6	6	6	1	2	2		15	6	14	35
2	2	4	6	1	2	6	4	6	1	1	6	3	4	5	2	5	6	6	1	5	2		24	10	10	44
6	6	6	6	6	6	6	6	6	6	6	6	6	1	6	1	6	6	6	1	6	6		39	30	8	77
4	5	6	5	1	5	4	6	3	4	4	2	2	5	1	2	3	3	2	3	3	4		38	14	31	83
1	1	1	6	6	1	6	1	6	1	1	6	1	1	1	1	6	6	6	1	6	6		9	15	8	32
3	6	6	6	1	4	6	6	6	5	3	6	4	6	1	1	1	6	6	1	6	3		37	13	13	63
4	4	5	6	4	5	4	5	4	1	1	4	4	4	1	6	4	5	3	5	5	1		42	8	21	71
3	4	5	6	1	5	6	5	5	1	1	6	4	5	1	4	6	6	6	1	3	2		36	6	12	54
2	5	2	6	1	3	6	4	4	1	1	4	4	4	1	1	4	5	4	4	4	4		29	8	19	56
2	2	1	6	1	1	2	1	1	1	1	1	1	1	1	1	2	6	6	1	2	1		11	5	30	46
4	5	4	5	1	4	6	2	6	1	1	4	2	2	1	2	6	6	6	1	6	2		26	6	11	43
4	5	4	5	1	4	5	4	4	1	2	4	4	4	1	2	5	5	5	2	5	4		33	9	18	60
4	4	4	5	1	4	2	4	5	1	3	4	5	5	2	1	2	5	2	1	2	4		32	11	29	72
2	6	2	6	1	6	6	6	6	1	1	6	2	2	1	2	6	6	6	1	2	2		29	6	12	47
2	2	2	6	1	2	5	2	6	1	1	2	2	2	1	2	6	6	6	1	4	2		17	6	15	38
4	4	2	6	1	2	5	2	5	1	1	5	2	2	2	2	6	5	6	1	5	5		21	10	13	44
4	3	4	6	1	4	4	4	5	1	3	5	3	4	2	2	3	3	4	1	4	3		29	10	22	61
4	4	4	6	1	4	4	2	6	2	1	2	4	4	2	2	4	3	4	1	5	5		29	11	22	62
4	5	5	6	1	4	6	6	6	1	1	5	2	2	1	1	4	5	4	1	6	5		30	9	14	53
4	4	4	5	1	1	6	5	5	3	1	1	3	6	1	3	4	4	4	4	4	4		34	10	23	67
4	6	6	6	2	2	5	6	5	4	1	4	3	6	4	2	5	5	3	4	4	5		39	16	19	74
6	5	5	6	4	5	5	5	4	2	1	4	6	5	2	2	4	2	1	4	2	1		43	10	28	81
4	4	4	6	1	1	6	2	6	1	1	6	2	2	1	1	6	6	6	1	5	4		21	8	9	38
1	5	6	6	6	1	6	1	6	1	1	6	1	1	1	1	6	6	6	1	6	1		18	10	8	36
3	4	5	2	4	3	3	2	2	3	4	1	1	6	2	1	2	2	1	1	6	2		26	15	37	78
2	2	2	6	1	2	6	1	5	1	2	5	2	2	1	2	6	6	6	1	6	1		16	6	10	32
4	5	5	5	4	4	4	3	2	1	2	3	4	4	4	4	4	4	4	2	3	2		35	13	27	75
2	2	1	6	1	1	6	1	6	1	1	6	1	1	1	1	6	6	6	1	6	1		11	5	8	24
2	4	4	6	2	4	4	4	4	2	3	4	3	4	1	1	4	5	4	2	5	2		28	10	20	58
4	4	4	4	4	4	4	4	4	4	4	4	4	5	3	4	4	4	4	4	4	4		37	19	24	80
2	6	2	6	1	3	1	1	6	1	1	6	2	6	1	1	6	6	6	1	1	1		24	5	18	47
2	5	2	6	2	2	5	2	6	1	1	6	2	5	1	2	6	6	6	1	6	1		23	6	9	38
4	4	3	6	1	3	6	6	5	1	1	5	4	4	1	3	5	4	4	1	5	3		32	7	16	55
4	5	5	5	4	4	4	4	4	2	4	4	4	4	4	4	4	4	4	4	4	4		38	18	23	79
2	6	2	6	1	2	6	5	6	1	1	6	2	4	1	1	6	6	6	1	6	1		25	5	8	38
2	2	2	4	1	2	6	2	5	2	2	4	2	2	2	2	4	4	4	1	4	2		17	9	21	47
2	4	4	6	1	2	4	2	2	2	2	4	2	4	2	1	5	5	4	2	5	2		23	9	21	53
4	6	6	6	4	6	6	6	2	1	1	1	2	4	2	2	6	2	2	5	5	2		41	10	26	77
6	6	6	6	6	4	5	6	6	2	4	5	4	5	2	5	6	6	6	6	6	6		48	20	10	78
2	3	4	6	1	3	6	3	3	1	1	4	3	3	1	3	6	6	6	4	4	1		28	5	15	48
4	6	6	6	2	6	6	6	5	5	5	3	5	4	1	2	5	5	3	5	4	5		44	18	19	81
4	2	2	6	1	1	6	2	6	1	1	5	4	4	1	4	4	5	4	2	5	2		25	6	15	46
1	1	1	6	6	1	6	1	6	1	1	6	1	1	2	1	5	6	6	1	1	1		9	11	14	34
2	1	1	2	1	2	1	2	6	1	1	6	2	1	1	2	6	5	5	1	6	1		14	5	19	38
4	4	4	5	2	4	4	5	4	4	5	4	4	5	4	4	4	4	4	4	5	2		38	17	22	77
2	5	4	5	2	4	5	4	4	1	2	2	3	2	1	2	2	6	6	1	2	2		27	8	24	59
3	6	6	6	1	4	3	6	5	1	5	4	1	6	2	1	2	3	2	4	4	4		37	13	27	77
2	5	4	4	1	2	4	4	2	1	1	4	2	4	1	2	2	2	2	2	2	2		27	6	34	67
6	4	2	6	1	2	6	6	4	6	5	4	4	5	1	4	4	5	4	1	6	6		34	19	17	70
4	4	4	4	2	4	4	4	4	2	1	4	2	4	1	2	2	2	4	2	4	4		30	10	28	68
1	4	4	6	1	1	1	1	6	1	1	5	4	3	5	2	5	5	5	2	1	5		22	13	22	57
1	2	6	6	6	1	4	6	6	1	1	6	2	2	6	1	6	6	6	1	6	2		22	16	10	48
2	2	4	6	2	1	2	2	6	1	2	4	1	2	6	2	4	2	4	2	6	1		18	12	22	52
4	2	5	6	1	1	6	3	6	1	1	5	4	4	1	1	6	6	6	1	6	1		25	5	9	39
2	2	2	6	1	2	6	1	6	1	1	5	2	1	1	1	5	5	5	1	6	2		14	6	12	32
2	2	2	5	1	2	5	2	5	4	3	5	2	2	1	2	4	5	5	2	4	2		18	11	18	47
4	4	4	5	1	4	4	4	4	1	1	5	4	6	1	1	4	4	2	2	6	2		33	6	22	61
4	4	4	6	1	2	2	2	3	1	1	5	4	3	2	2	5	1	5	1	3	3		26	8	26	60
2	2	2	2	1	2	3	1	2	1	1	2	1	2	1	1	4	4	4	2	2	1		15	5	33	53
4	4	4	4	2	3	4	3	4	2	2	3	4	3	2	3	3	4	4	3	3	3		31	11	27	69
2	3	2	6	1	1	4	3	6	1	1	2	4	5	1	6	3	6	6	1	6	2		27	6	17	50
1	2	2	6	4	1	6	1	6	1	1	6	1	1	1	1	4	6	6	1	6	1		11	8	10	29
4	5	6	5	1	4	6	5	6	1	1	5	4	5	1	1	6	5	5	1	4	4		35	8	14	57
2	2	1	6	1	1	5	1	6	1	1	6	2	2	1	1	6	6	6	1	6	1		13	5	9	27
2	5	6	6	6	5	6	6	6	1	2	1	5	5	1	5	6	5	1	5	6	2		44	12	19	75
2	2	2	5	4	3	3	2	2	2	3	3	5	3	3	3	3	3	3	3	3	3		25	15	31	71
2	6	6	6	1	6	6	6	6	1	1	6	6	6	1	6	6	6	1	6	6	1		50	5	13	68
4	5	5	6	1	3	4	6	1	1	1	2	4	6	1	4	5	5	5	2	4	2		39	6	24	69
2	2	2	6	2	1	6	1	6	1	1	5	2	2	1	1	6	6	6	1	6	1		14	6	9	29
2	3	4	5	2	2	5	2	6	4	5	3	3	2	2	2	6	5	5	3	5	5		23	18	16	57
4	4	4	6	5	4	6	4	6	1	1	5	2	2	1	1	6	6	6	1	6	2		26	10	9	45
1	6	6	6	1	6	6	1	6	1	6	6	1	6	6	1	6	6	6	1	6	1		29	15	8	52
1	4	4	6	1	2	5	2	4	1	1	6	2	2	1	1	6	5	6	1	6	2		19	6	12	37
4	6	4	6	2	2	5	5	6	1	1	2	2	6	2	2	2	4	4	1	4	2		32	8	23	63
2	2	2	6	1	2	5	2	5	1	1	5	2	2	1	2	6	6	6	2	2	1		18	5	15	38
3	3	3	6	1	2	6	2	5	1	1	5	2	3	1	1	6	5	5	2	5	2		21	6	13	40
4	4	3	4	4	3	4	4	4	2	1	3	2	3	2	1	2	4	4	2	4	2		26	11	27	64
4	4	4	6	2	4	4	4	4	1	1	5	2	2	1	3	5	6	5	2	3	2		29	7	18	54
3	4	4	5	1	4	4	5	5	1	1	4	3	3	1	2	2	3	4	1	6	2		29	6	23	58
4	4	2	6	1	1	4	2	2	1	1	4	3	1	1	1	4	6	2	1	4	2		19	6	24	49
2	2	2	2	1	2	6	2	2	1	1	5	2	2	1	1	2	2	3	1	6	1		16	5	28	49
3	6	6	6	1	4	3	2	4	1	2	6	2	6	1	1	2	2	2	2	2	2		32	7	29	68
2	2	4	5	1	2	4	2	6	1	1	5	2	2	2	2	6	6	6	1	5	4		19	9	13	41
6	6	6	6	1	6	1	6	6	1	6	1	6	6	1	6	6	1	6	6	6	6		54	15	23	92
4	5	5	6	2	2	5	4	4	4	3	5	4	5	3	3	5	5	5	4	5	2		36	14	16	66
3	4	4	4	1	3	5	4	4	1	1	5	3	3	2	2	4	4	4	2	4	2		28	7	22	57
1	1	1	6	1	1	6	1	6	1	1	6	1	1	1	1	6	6	6	1	6	1		9	5	8	22
1	1	1	6	1	1	6	1	6	1	1	6	1	1	1	6	6	6	6	1	1	6		14	10	13	37
2	4	3	4	2	4	4	2	2	1	1	5	2	1	1	1	2	2	3	1	1	2		20	7	33	60
4	4	5	6	2	4	6	5	6	1	1	5	2	4	6	2	6	6	6	3	6	3		33	13	9	55
2	2	2	2	2	2	2	2	2	2	2	2	2	2	2	2	2	2	2	2	2	2		18	10	40	68
4	6	6	6	1	2	6	6	4	1	1	4	4	4	1	1	6	6	6	2	6	4		35	8	12	55
6	6	6	6	1	6	6	6	6	1	1	1	6	6	1	1	6	6	6	1	6	6		44	10	13	67
5	4	4	6	1	5	5	2	5	1	1	4	2	2	1	1	5	6	6	2	6	2		27	6	13	46
5	6	6	5	4	4	6	5	5	1	1	3	2	4	1	1	6	6	6	1	2	1		34	8	17	59
2	2	2	6	1	2	5	2	5	1	1	5	2	2	2	2	6	6	6	2	5	1		18	6	12	36
4	4	4	6	1	4	6	1	6	1	1	6	4	5	1	1	6	5	6	2	5	2		29	6	10	45
2	2	2	6	1	1	6	1	6	1	1	6	2	1	1	1	6	6	6	1	6	1		13	5	8	26
4	4	6	6	4	1	6	4	1	1	2	6	2	3	1	2	6	6	1	3	4	3		29	11	20	60
5	5	6	6	5	4	6	5	5	5	5	5	5	1	1	4	5	5	5	5	5	5		40	21	14	75
4	4	4	4	1	4	4	2	4	1	1	5	4	3	1	1	4	4	5	1	6	1		27	5	20	52
2	2	2	6	1	1	6	6	6	1	1	6	1	1	1	1	6	6	6	1	6	1		17	5	8	30
2	4	4	6	1	2	6	2	6	1	1	5	2	3	1	1	6	5	5	1	6	1		21	5	11	37
2	4	4	6	2	2	4	2	4	1	1	2	2	2	1	2	6	5	4	2	4	2		22	7	21	50
2	2	2	6	6	1	6	2	2	1	1	6	2	1	1	1	6	2	6	2	1	1		15	10	21	46
2	4	4	6	1	2	5	4	4	1	1	4	2	4	1	2	4	5	5	2	4	1		26	5	19	50
1	4	1	5	1	2	6	1	6	1	1	6	1	5	1	1	6	6	6	1	6	1		17	5	9	31
4	5	4	6	6	1	6	1	6	1	1	6	1	1	1	1	6	6	6	1	6	1		19	10	8	37
4	4	2	6	1	2	2	3	3	1	1	6	2	1	1	1	6	5	6	6	2	2		25	6	20	51
2	4	2	6	1	2	6	1	6	1	1	6	1	2	1	1	2	6	6	1	6	1		16	5	12	33
4	4	4	4	4	4	5	4	4	3	4	4	4	4	4	3	4	4	3	3	4	5		34	20	24	78
4	1	1	6	1	1	1	1	1	1	1	6	1	1	1	1	6	6	6	1	6	4		12	8	18	38
2	4	5	6	1	2	6	2	6	1	1	6	2	3	1	2	6	6	6	1	4	1		23	5	10	38
4	5	5	4	4	5	5	5	4	4	4	2	4	5	2	4	2	2	4	4	4	4		41	18	29	88
2	5	2	6	1	4	5	5	6	1	5	6	2	6	2	1	6	6	5	2	4	1		29	10	12	51
3	1	1	6	2	2	6	1	6	4	4	6	2	2	1	1	4	5	6	2	6	1		15	12	11	38
1	1	2	6	1	1	6	1	6	1	1	6	1	1	1	1	6	6	6	1	6	6		10	10	8	28
5	6	6	6	1	1	6	6	4	4	4	2	5	6	1	5	5	6	2	5	4	2		45	12	21	78
4	6	5	6	6	5	6	6	6	1	2	6	2	6	2	4	6	6	6	1	6	4		39	15	8	62
1	2	1	5	1	1	3	2	4	1	1	6	2	5	1	1	4	6	6	1	5	2		16	6	17	39
2	1	1	1	1	1	6	1	6	1	1	6	1	2	1	1	6	6	6	1	6	6		11	10	13	34
2	4	4	6	1	2	6	2	5	1	1	2	2	4	1	1	2	4	4	2	5	2		23	6	22	51
4	4	4	4	1	6	6	5	5	1	2	4	2	5	1	1	2	2	1	4	4	2		35	7	28	70
2	2	4	6	1	4	5	4	4	1	1	6	2	6	1	2	5	5	6	1	2	5		27	9	17	53
4	4	5	5	1	4	6	4	5	1	2	5	2	6	2	2	5	5	6	2	5	6		33	12	14	59
2	2	2	2	1	2	2	2	2	1	1	6	2	2	1	2	2	2	6	1	6	1		17	5	28	50
2	2	2	4	6	2	6	2	6	1	1	6	2	2	1	1	6	6	6	1	6	1		16	10	10	36
2	2	1	2	1	1	2	2	1	1	1	6	2	2	1	1	4	6	6	1	4	1		14	5	25	44
2	4	2	5	1	2	4	2	5	1	1	6	2	1	1	1	5	5	5	1	4	1		17	5	17	39
2	4	2	2	2	2	2	2	2	1	1	2	2	2	2	2	2	2	2	1	2	2		19	8	40	67
5	5	5	5	5	5	5	5	5	1	2	2	2	5	1	2	2	4	6	2	5	4		36	13	22	71
2	4	2	5	1	2	4	2	4	2	2	5	2	2	1	1	5	4	2	2	2	2		19	8	25	52
2	4	5	5	1	2	4	4	5	1	1	5	2	4	1	1	6	6	6	1	6	1		25	5	13	43
4	4	5	6	1	2	2	1	1	1	1	6	2	2	1	1	6	6	1	1	2	1		22	5	26	53
1	2	2	5	1	1	6	1	6	1	1	6	1	1	1	1	6	6	6	1	6	1		11	5	9	25
2	4	4	6	2	4	4	5	5	1	1	5	2	2	1	4	4	5	4	2	4	2		29	7	19	55
3	4	4	5	1	3	6	2	6	2	1	4	2	4	1	2	5	4	5	2	5	2		26	7	16	49
6	6	6	6	6	6	6	6	6	1	1	2	6	6	1	6	6	5	6	6	6	6		54	15	13	82
2	4	4	4	1	1	6	4	6	4	1	6	2	2	1	1	6	6	6	1	6	2		21	9	10	40
3	2	6	4	4	2	4	2	2	6	4	4	2	2	2	2	2	1	3	2	2	2		23	18	34	75
2	4	4	6	1	2	5	3	6	1	1	5	2	4	1	4	6	4	6	1	5	4		26	8	13	47
4	4	6	6	4	4	6	4	5	4	4	4	4	6	4	4	5	4	4	2	4	4		38	20	18	76
2	5	4	6	2	1	6	6	6	1	1	6	2	6	1	2	5	2	4	1	6	2		29	7	15	51
4	4	4	6	1	2	4	2	5	1	1	5	4	2	1	1	6	6	4	1	6	2		24	6	14	44
3	6	6	6	1	3	5	6	6	4	3	1	6	4	1	1	6	6	6	6	6	3		41	12	14	67
6	6	6	6	6	6	6	6	6	6	6	1	6	6	6	6	6	6	6	6	6	6		54	30	13	97
4	4	4	5	3	4	6	4	5	1	1	5	4	4	1	1	6	6	4	1	6	4		30	10	13	53
1	1	1	6	1	1	6	1	6	1	1	1	1	1	1	1	6	6	6	1	6	6		9	10	13	32
2	2	2	6	2	2	5	2	5	2	2	4	2	2	1	2	5	4	4	2	5	2		18	9	18	45
1	2	2	1	1	1	6	1	6	1	1	6	1	1	1	1	6	6	6	1	2	1		11	5	17	33
3	5	3	6	1	1	6	1	4	1	1	6	2	2	1	1	6	6	6	1	6	6		19	10	10	39
2	2	2	6	1	1	6	6	1	1	1	6	1	1	1	1	1	1	2	1	2	1		17	5	31	53
6	5	5	4	5	5	5	5	5	6	5	5	5	5	2	6	6	5	6	5	4	5		47	23	16	86
1	1	1	6	1	1	6	1	6	1	1	6	1	1	1	1	6	6	6	1	1	1		9	5	13	27
4	4	4	5	1	1	5	5	5	1	1	5	4	5	1	2	5	6	6	4	4	1		33	5	15	53
1	2	1	6	6	1	6	1	6	1	1	6	1	6	1	1	6	6	6	1	6	2		15	11	8	34
5	5	5	4	2	5	6	6	5	1	1	5	6	5	1	4	6	2	2	2	4	1		43	6	22	71
3	2	3	2	2	2	4	3	4	2	2	4	4	4	4	5	5	4	5	2	3	3		28	13	25	66
5	5	4	6	2	2	5	4	5	2	2	4	6	6	1	2	5	4	2	2	2	2		36	9	23	68
1	4	4	6	1	1	6	2	6	1	1	6	2	3	1	1	6	6	6	1	6	2		19	6	8	33
3	4	4	4	1	4	4	4	4	2	2	5	4	4	1	2	4	5	5	3	4	4		32	10	21	63
2	4	2	5	2	2	5	2	5	2	1	4	2	3	1	2	5	5	4	1	5	2		20	8	18	46
2	3	2	5	1	1	6	2	6	1	1	6	2	2	1	2	5	6	6	1	5	2		17	6	11	34
2	4	4	5	1	4	5	5	6	1	2	6	2	3	1	3	4	5	4	3	4	4		30	9	17	56
2	3	4	6	2	2	6	5	6	2	2	6	2	5	2	1	6	6	6	1	6	2		25	10	8	43
2	2	2	5	1	2	5	2	2	1	2	5	4	2	1	1	5	5	5	2	2	2		19	7	22	48
2	2	2	6	6	2	6	2	5	1	1	6	1	4	1	1	6	6	6	2	6	3		18	12	9	39
2	2	2	3	1	2	3	3	3	1	1	5	3	1	1	1	4	6	6	1	6	4		17	8	20	45
2	2	4	6	1	2	2	4	6	1	1	2	2	2	1	2	2	3	6	2	2	6		22	10	27	59
2	2	1	6	1	1	6	1	6	1	1	6	1	1	1	1	6	6	6	1	6	1		11	5	8	24
4	6	6	6	1	2	6	6	6	1	2	6	3	6	2	3	6	6	6	3	6	4		39	10	8	57
2	2	2	4	2	2	2	2	4	1	1	4	2	2	1	2	4	5	5	1	5	6		17	11	23	51
5	6	5	5	4	5	5	6	5	4	5	3	5	5	5	3	4	3	5	4	4	5		44	23	22	89
5	6	6	6	6	6	6	6	6	6	6	6	6	6	6	6	6	6	6	6	6	6		53	30	8	91
1	1	4	6	1	1	6	1	6	1	1	6	1	1	1	1	6	6	6	1	6	1		12	5	8	25
1	2	1	6	1	2	6	2	6	1	1	6	1	1	1	1	6	6	6	1	6	1		12	5	8	25
6	6	6	6	6	6	6	6	6	1	1	6	5	6	1	6	6	6	6	5	6	4		52	13	8	73
5	5	5	5	6	4	6	6	6	1	1	6	2	2	1	1	6	6	6	1	6	6		31	15	9	55
3	4	4	4	2	4	3	4	3	2	2	4	2	4	2	2	2	2	2	3	3	1		30	9	33	72
2	4	4	5	1	1	4	2	4	2	1	5	2	2	1	2	2	4	4	1	5	2		20	7	23	50
1	1	1	1	1	1	1	1	1	1	1	1	1	1	1	1	1	1	1	1	1	1		9	5	48	62
4	4	2	6	1	1	4	2	6	1	1	6	2	2	1	1	6	6	6	1	5	1		19	5	11	35
6	6	6	6	6	6	6	6	6	1	1	1	6	6	6	6	6	6	1	6	6	6		54	20	18	92
4	4	4	6	2	4	6	4	5	4	4	3	4	4	1	4	4	4	5	4	5	4		36	15	18	69
4	4	4	6	1	4	4	5	4	2	2	5	2	2	2	3	5	5	4	4	4	4		32	11	19	62
1	4	4	6	1	1	4	2	6	1	1	6	4	4	1	1	6	6	6	1	3	1		22	5	13	40
2	1	2	6	1	1	6	1	6	1	1	6	2	1	1	1	6	6	6	1	6	2		12	6	8	26
6	6	6	6	1	6	6	6	6	6	6	6	6	6	6	6	6	6	6	6	6	6		54	25	8	87
2	2	2	5	1	2	5	2	4	1	1	5	2	2	1	2	5	5	5	2	5	4		18	8	17	43
2	2	2	2	1	1	2	2	2	1	1	6	1	1	1	1	5	5	6	1	2	1		13	5	26	44
3	3	2	6	1	1	6	2	6	1	1	6	2	1	6	1	5	6	6	1	6	1		16	10	9	35
5	5	5	6	1	5	6	3	5	4	4	4	3	6	1	1	1	1	1	1	4	5		34	15	28	77
2	2	2	6	1	4	4	2	2	1	1	5	2	4	1	1	4	4	1	1	5	4		20	8	25	53
6	6	6	6	6	6	6	6	6	6	6	6	6	6	6	6	6	6	6	5	6	6		53	30	8	91
4	4	4	6	1	4	6	4	4	2	4	4	4	4	1	1	6	6	6	1	6	4		30	12	12	54
4	4	3	3	3	4	1	1	1	1	1	1	1	1	4	3	3	3	1	1	2	3		22	12	41	75
1	1	1	6	1	1	6	1	6	1	1	6	1	1	1	1	5	5	6	1	5	1		9	5	11	25
6	6	6	6	6	6	6	5	5	1	1	4	4	6	1	2	1	3	6	4	5	5		45	14	20	79
2	2	2	6	1	2	6	2	6	2	1	6	2	2	1	2	5	6	6	1	6	2		17	7	9	33
2	2	2	6	2	1	6	1	6	1	1	6	2	2	1	1	6	6	6	1	6	2		14	7	8	29
2	5	5	6	1	1	6	2	6	1	1	6	1	2	1	1	6	5	4	1	2	1		20	5	15	40
1	1	1	1	1	1	1	5	5	1	1	1	1	1	5	5	5	5	5	1	5	1		17	9	28	54
2	4	4	4	2	4	5	3	4	2	2	5	2	2	2	2	4	3	2	4	4	2		27	10	25	62
2	5	4	6	1	5	4	4	3	4	2	5	3	5	1	2	6	6	6	2	2	2		32	10	18	60
5	4	4	4	1	1	1	1	2	1	1	6	2	1	1	1	4	5	4	1	6	1		20	5	24	49
2	2	2	2	1	2	5	2	3	2	2	5	2	2	1	1	6	6	4	2	2	1		17	7	23	47
2	2	1	6	1	1	6	1	6	1	1	6	2	2	1	1	6	6	5	1	6	6		13	10	9	32
3	4	2	5	1	4	5	4	5	2	2	4	2	3	1	1	4	5	6	2	5	3		25	9	17	51
2	2	2	5	1	2	6	2	6	1	2	5	2	2	1	2	5	5	6	2	6	2		18	7	12	37
1	4	1	6	1	2	5	1	1	1	6	6	1	1	1	1	6	6	6	1	6	1		13	10	14	37
4	4	4	5	5	3	6	5	6	1	1	6	6	5	1	1	6	5	6	1	6	5		33	13	10	56
2	2	2	6	1	2	6	2	6	1	1	5	2	2	1	1	4	4	6	1	4	1		16	5	15	36
2	4	4	6	6	1	2	1	2	1	1	5	2	2	1	1	6	6	6	1	6	2		18	11	17	46
2	2	2	6	1	2	5	2	5	2	2	5	2	3	2	2	6	5	5	2	2	2		19	9	17	45
1	2	3	1	1	1	1	1	3	2	2	6	2	2	1	1	1	1	1	2	2	3		15	9	40	64
3	5	4	3	3	3	3	3	3	4	4	3	3	3	4	5	4	4	4	4	4	4		33	19	28	80
1	3	2	6	1	2	4	2	1	1	2	6	2	2	1	1	4	4	2	1	4	2		16	7	25	48
4	4	4	4	1	1	5	4	4	1	1	3	4	4	1	1	4	4	5	1	4	1		27	5	23	55
2	2	1	6	1	1	6	1	6	1	1	6	1	1	1	1	6	6	6	1	6	2		11	6	8	25
2	2	2	2	1	2	6	2	2	1	1	4	2	1	1	2	6	6	6	2	2	1		17	5	22	44
3	5	5	5	1	4	4	5	4	3	4	3	3	5	1	1	3	2	5	1	5	1		32	10	25	67
2	2	3	6	1	2	5	2	5	1	1	5	2	2	1	2	5	6	6	2	5	2		19	6	13	38
6	6	6	6	6	6	6	6	6	6	6	6	6	6	6	6	6	6	6	6	6	6		54	30	8	92
6	6	6	6	6	6	6	6	6	6	6	6	6	6	6	6	6	6	6	6	6	6		54	30	8	92
2	2	4	6	1	1	4	2	6	1	2	5	2	2	1	1	6	5	4	1	6	2		17	7	14	38
6	6	6	6	6	6	6	6	6	6	6	6	6	6	6	6	6	6	6	6	6	6		54	30	8	92
6	6	6	6	6	6	6	6	6	6	6	6	6	6	6	6	6	6	6	6	6	6		54	30	8	92
4	6	5	6	1	3	4	5	4	4	1	6	4	6	1	1	5	6	6	3	4	1		37	8	15	60
4	5	5	5	5	5	5	5	5	5	5	4	5	5	5	5	5	5	5	5	5	5		44	25	17	86
2	4	2	6	2	2	6	2	6	1	2	6	2	2	1	1	6	6	5	1	6	2		18	8	9	35
2	4	2	6	1	2	6	2	6	1	1	6	2	2	1	2	6	4	5	1	6	2		19	6	11	36
1	4	4	3	4	2	4	4	3	4	3	4	4	2	2	4	2	2	2	2	2	4		27	17	34	78
4	4	4	5	2	3	5	3	5	2	2	6	3	2	1	1	4	4	5	4	4	1		28	8	18	54
2	2	2	6	1	1	6	1	6	1	1	6	1	1	1	1	6	6	6	1	6	2		12	6	8	26
2	2	2	4	1	2	6	3	3	1	1	6	2	2	1	1	3	3	4	1	6	2		17	6	21	44
3	6	4	6	3	6	6	6	6	6	6	4	6	4	2	2	1	1	1	1	1	6		38	23	30	91
3	6	6	5	1	3	5	6	5	2	2	3	3	5	6	3	4	4	4	2	6	2		37	13	20	70
2	6	6	5	6	6	2	2	2	2	1	6	2	2	1	1	2	2	2	1	2	2		28	12	33	73
5	5	2	2	2	2	3	2	5	1	1	5	5	4	3	3	5	5	5	3	3	3		31	10	23	64
5	2	2	6	1	6	6	5	5	2	1	3	5	5	5	5	5	5	5	5	5	5		40	14	16	70
2	5	6	6	1	1	6	1	6	1	1	6	2	6	4	5	6	1	6	3	1	3		31	10	18	59
2	3	2	6	1	1	3	3	4	1	1	5	2	5	1	1	4	4	6	1	5	1		20	5	19	44
4	5	5	5	3	3	3	3	4	5	3	3	3	3	3	2	2	3	2	4	4	5		32	19	30	81
2	2	2	6	2	1	6	2	6	1	1	6	2	3	1	1	6	6	6	1	6	1		16	6	8	30
2	2	1	6	1	2	5	1	6	1	1	6	2	1	1	1	6	6	6	1	6	1		13	5	9	27
2	6	6	6	1	6	2	6	6	2	1	1	2	6	1	2	6	6	6	1	6	1		37	6	17	60
2	2	2	2	1	2	2	2	2	1	1	5	2	2	1	2	5	5	5	2	2	2		18	6	28	52
2	4	5	6	1	2	6	4	4	2	1	2	1	2	1	2	5	5	4	1	6	2		23	7	18	48
5	5	5	1	1	5	6	6	1	1	1	6	3	4	6	6	6	6	6	1	6	6		40	15	18	73
2	3	4	5	1	2	5	1	5	2	5	6	2	2	1	1	6	6	5	5	6	3		22	12	12	46
3	3	3	6	6	1	6	6	6	1	1	6	1	4	3	3	6	6	6	6	6	6		30	17	8	55
2	2	2	2	1	1	3	2	2	2	2	2	2	2	2	2	2	2	2	2	6	2		17	9	35	61
4	4	6	5	2	5	3	6	5	4	4	4	3	4	4	4	4	4	3	4	4	4		40	18	24	82
2	6	6	6	1	6	6	4	6	1	1	2	2	6	1	6	6	4	6	4	6	6		42	10	14	66
6	6	6	6	6	6	5	5	5	5	5	5	5	5	5	5	5	5	5	5	5	5		49	26	15	90
4	5	4	6	1	1	5	6	6	1	1	6	4	6	1	2	4	3	4	4	1	1		36	5	21	62
2	2	2	6	1	2	6	6	2	2	1	6	2	2	1	1	5	6	6	1	6	6		20	11	13	44
2	2	2	6	1	1	4	1	2	1	1	6	2	6	1	2	4	2	2	2	2	2		20	6	28	54
1	2	2	6	1	2	2	1	6	1	1	6	2	1	1	1	6	6	6	1	1	1		13	5	17	35
4	4	4	6	5	2	4	2	6	1	1	6	2	4	1	1	5	5	6	1	6	1		24	9	12	45
6	6	6	6	6	6	6	6	2	6	6	1	5	6	2	4	5	5	5	4	6	6		49	26	20	95
2	2	2	6	1	1	6	6	5	1	1	6	2	2	1	4	3	6	5	1	6	2		22	6	13	41
2	2	1	6	1	1	2	1	6	1	1	6	1	2	1	1	6	6	1	1	6	2		12	6	17	35
2	1	1	6	2	1	1	1	1	1	1	1	1	1	1	1	1	1	1	1	1	1		10	6	43	59
2	3	2	4	2	2	6	1	2	1	1	5	1	1	6	1	6	1	6	1	6	3		14	13	20	47
2	5	4	6	1	5	4	4	4	2	2	4	1	2	2	2	5	2	2	2	2	2		27	9	27	63
2	3	3	4	3	3	3	3	1	1	1	1	1	1	1	1	2	4	3	2	2	4		19	10	36	65
2	2	1	6	1	2	6	2	6	1	1	6	1	1	1	1	6	6	6	1	6	2		13	6	8	27
3	6	4	6	1	1	4	4	5	1	1	6	2	4	1	2	5	5	5	2	5	2		28	6	15	49
2	2	2	6	1	2	6	1	5	1	1	6	2	2	1	1	5	6	6	2	6	2		16	6	10	32
6	1	6	6	6	6	6	6	6	6	6	6	6	6	6	6	6	6	6	6	6	6		49	30	8	87
2	1	2	6	1	1	6	1	2	1	1	6	1	2	1	1	6	6	6	1	6	2		12	6	12	30
1	1	3	5	1	1	5	2	5	1	1	1	1	2	1	1	6	5	6	1	6	1		13	5	17	35
2	6	6	5	2	6	6	6	2	2	4	2	4	6	2	2	4	2	2	6	3	2		44	12	30	86
2	4	4	5	1	4	6	5	5	1	1	5	2	4	2	2	4	4	4	2	5	4		29	9	18	56
1	1	1	6	1	1	6	6	6	1	1	6	1	1	6	1	6	6	6	1	6	1		14	10	8	32
3	5	5	4	4	4	4	4	4	4	4	4	4	4	4	4	4	4	4	4	4	4		37	20	24	81
5	6	5	5	1	5	6	6	5	6	6	2	3	5	1	1	6	1	3	5	5	6		41	20	23	84
6	6	6	6	5	6	6	6	6	1	1	4	4	5	1	4	6	6	1	5	6	2		48	10	15	73
5	5	5	5	4	5	5	4	4	5	6	4	4	4	5	4	5	5	5	4	5	4		40	24	18	82
1	6	6	6	1	1	6	4	6	1	1	6	1	6	1	1	6	6	5	1	5	1		27	5	10	42
2	2	3	6	1	1	2	2	5	1	1	6	2	1	1	2	5	5	6	1	5	3		16	7	16	39
4	4	5	5	1	2	5	3	4	1	1	5	5	5	1	1	4	5	5	1	4	5		30	9	19	58
4	4	6	5	6	6	5	5	5	2	3	2	5	5	2	2	4	1	2	5	3	3		42	16	29	87
5	4	6	6	1	6	6	4	4	4	6	3	5	6	2	6	1	3	1	1	6	1		43	14	26	83
1	2	2	6	1	1	2	1	4	1	1	6	1	2	1	1	6	6	6	1	6	1		12	5	14	31
5	6	6	6	4	5	5	5	5	5	5	5	2	5	2	4	5	4	4	4	5	5		42	21	17	80
4	4	2	5	2	2	2	2	2	2	2	5	2	2	2	2	2	4	2	2	2	2		22	10	32	64
2	2	4	2	1	2	2	3	3	2	1	6	4	3	1	2	2	2	6	1	2	1		23	6	31	60
2	2	6	6	1	2	2	2	5	1	1	2	2	1	2	1	2	2	1	1	2	2		19	7	34	60
4	6	6	3	1	6	3	6	6	6	1	1	4	6	1	1	5	1	1	1	1	1		40	10	35	85
4	4	4	4	4	4	4	4	4	4	4	4	4	4	4	4	4	4	4	4	4	4		36	20	24	80
4	2	4	6	1	2	6	1	6	1	1	6	2	1	1	1	6	6	6	1	6	2		18	6	8	32
3	3	3	3	3	3	3	3	3	3	3	6	2	5	3	2	3	6	6	3	3	2		27	14	23	64
6	6	6	6	1	6	1	6	1	5	6	1	6	6	1	4	3	1	1	6	5	6		52	19	37	108
1	6	6	6	1	1	6	6	6	1	1	6	1	1	1	6	6	6	1	1	6	1		29	5	13	47
1	6	6	6	1	1	6	1	6	1	1	6	1	6	1	1	6	6	6	1	6	1		24	5	8	37
2	5	5	3	4	4	4	4	4	4	3	2	3	5	3	4	4	2	2	2	4	4		34	18	31	83
1	6	1	6	6	1	6	2	4	1	1	6	1	5	4	1	6	6	6	4	1	5		22	17	15	54
1	2	1	6	1	1	6	1	6	1	1	6	1	6	1	6	6	6	6	1	6	1		20	5	8	33
1	3	4	4	1	1	6	1	6	1	1	6	1	1	1	1	5	6	6	1	4	5		14	9	13	36
2	2	2	2	2	2	2	4	2	2	2	2	2	2	2	2	2	2	2	2	2	2		20	10	40	70
5	5	4	5	1	4	5	5	5	2	1	2	5	4	2	2	4	6	1	2	4	5		36	11	24	71
4	6	4	6	1	3	6	6	6	1	1	2	2	6	1	2	4	4	2	2	6	1		35	5	20	60
2	2	2	4	1	2	6	2	6	1	1	5	2	2	1	1	5	5	6	2	5	2		17	6	14	37
4	4	5	6	3	4	5	4	5	3	3	4	4	4	5	5	5	5	4	3	5	4		37	18	17	72
2	2	2	6	1	1	6	1	6	1	1	6	2	1	1	1	6	6	6	1	6	1		13	5	8	26
4	4	6	6	6	6	6	6	6	6	6	6	6	6	6	6	6	6	6	6	6	6		50	30	8	88
4	4	4	4	2	3	4	4	4	4	2	3	3	4	2	2	4	4	3	2	3	2		30	12	27	69
6	6	6	6	6	6	6	1	6	6	6	6	6	6	6	6	6	6	6	6	6	6		49	30	8	87
6	6	6	6	6	6	6	6	6	6	6	6	6	6	6	6	6	6	6	6	6	6		54	30	8	92
1	2	2	6	1	1	4	1	2	1	1	2	1	4	1	1	4	6	5	1	6	1		14	5	21	40
2	3	4	4	1	2	2	2	1	1	2	2	2	2	1	1	2	2	2	2	2	2		20	7	39	66
5	5	6	6	1	4	4	5	4	4	3	4	5	5	2	4	4	4	4	3	3	5		42	15	23	80
2	2	2	2	2	2	2	2	2	2	2	2	2	2	2	2	2	2	2	2	2	2		18	10	40	68
2	2	2	2	1	2	4	2	2	1	1	4	2	2	1	1	4	4	6	1	6	1		16	5	24	45
4	5	6	6	5	6	6	5	5	2	2	2	2	5	2	3	5	5	4	5	5	4		41	15	18	74
2	2	2	5	1	3	2	3	3	2	1	5	3	3	2	2	2	3	3	1	2	2		21	8	31	60
5	6	5	5	1	1	6	6	5	5	1	5	4	6	1	5	6	5	1	5	5	4		43	12	18	73
1	2	1	6	1	1	6	1	6	1	1	6	1	2	1	1	6	6	6	1	6	1		11	5	8	24
2	2	1	6	1	1	6	2	6	1	1	6	4	2	1	1	6	5	4	1	6	2		16	6	11	33
6	6	6	6	6	6	6	6	6	6	6	6	6	6	6	6	6	6	6	6	6	6		54	30	8	92
2	2	4	3	1	2	6	3	6	1	1	6	3	2	1	1	6	6	6	3	5	1		22	5	12	39
2	4	4	6	1	1	6	3	1	1	1	6	2	3	1	2	1	1	1	1	4	1		22	5	30	57
2	4	4	6	1	2	5	6	2	1	1	2	2	4	1	2	6	6	6	2	2	2		28	6	21	55
2	4	2	4	1	1	4	2	2	1	1	1	1	4	3	2	2	1	2	1	2	1		19	7	38	64
5	6	5	6	5	6	4	5	6	1	1	6	5	5	1	5	6	6	6	1	6	1		43	9	10	62
5	6	6	6	4	6	5	6	6	2	1	1	2	6	1	3	6	6	4	6	5	6		46	14	17	77
1	2	6	6	1	1	2	1	6	1	1	1	1	1	1	1	6	6	6	1	6	1		15	5	17	37
5	5	5	6	1	4	4	4	5	2	1	4	4	4	2	4	4	4	3	3	3	2		38	8	23	69
2	4	2	2	2	2	2	4	4	2	2	5	1	2	1	2	4	2	2	1	4	1		20	8	31	59
6	6	6	6	1	1	6	1	6	1	1	6	6	6	1	1	6	6	6	1	6	6		34	10	8	52
4	4	4	6	1	1	6	1	6	1	1	6	2	2	1	1	6	6	6	1	6	1		20	5	8	33
2	2	4	6	6	2	3	2	5	1	1	1	2	1	2	1	1	2	2	2	2	2		18	12	34	64
1	2	2	6	1	2	2	2	6	1	1	6	2	2	1	1	6	6	6	1	2	2		15	6	16	37
5	5	5	5	5	6	4	5	5	5	5	4	5	5	5	5	4	5	5	5	5	5		46	25	19	90
2	4	2	6	1	2	6	4	2	1	1	4	2	4	1	1	6	6	4	2	6	1		23	5	16	44
4	6	6	5	1	5	5	6	5	1	1	5	5	5	1	2	5	6	6	1	5	1		40	5	14	59
2	3	1	4	1	2	5	1	5	1	1	6	2	4	1	2	6	6	6	1	4	1		18	5	14	37
3	5	5	5	2	5	5	3	5	4	3	3	4	5	3	3	5	4	4	2	3	4		35	16	22	73
5	2	2	6	1	2	6	6	6	1	1	6	2	2	1	2	6	5	4	1	2	2		24	6	15	45
4	2	2	2	6	3	3	2	4	3	4	6	4	4	3	3	2	5	5	3	5	5		27	21	24	72
2	4	5	6	1	5	5	5	5	1	1	1	2	5	1	1	4	4	2	5	4	2		34	6	25	65
2	4	4	6	1	2	4	4	4	1	1	3	4	4	1	1	1	1	3	1	4	4		26	8	30	64
3	3	3	6	2	3	6	2	5	2	2	5	4	3	2	2	5	5	5	2	5	2		25	10	14	49
4	4	4	4	4	4	4	4	4	4	4	4	5	4	5	4	4	4	4	4	4	4		37	21	24	82
3	5	6	6	6	6	6	6	6	1	6	6	6	6	6	6	6	6	6	5	6	4		49	23	8	80
2	2	2	6	1	1	2	2	2	2	2	5	2	2	1	1	6	6	6	1	2	2		15	8	21	44
4	6	4	6	1	4	4	4	5	2	1	2	2	5	3	2	2	4	5	2	1	2		33	9	27	69
5	5	5	4	4	4	4	4	4	4	4	5	4	3	4	4	4	4	4	4	4	4		38	20	23	81
5	5	5	6	1	2	2	4	6	1	1	6	2	2	2	5	4	6	6	2	6	6		32	11	14	57
2	2	2	6	1	3	6	4	6	1	1	4	2	1	1	1	6	6	6	2	6	1		19	5	10	34
2	2	2	6	1	1	6	2	5	1	1	5	1	2	1	1	1	5	5	1	4	1		14	5	19	38
4	6	4	6	1	6	6	6	2	1	1	1	4	6	1	3	4	6	5	3	4	4		42	8	22	72
1	1	1	6	1	1	2	1	6	1	1	6	1	1	1	2	6	5	6	1	6	2		10	6	13	29
3	2	2	6	1	1	6	4	6	1	1	6	2	4	1	1	6	6	6	1	6	1		20	5	8	33
2	4	2	6	1	2	6	1	6	1	1	6	1	3	1	1	6	6	6	1	1	5		17	9	13	39
1	1	6	6	1	1	6	1	6	1	1	6	1	1	1	1	6	6	6	1	6	6		14	10	8	32
5	6	6	6	5	4	6	6	6	3	3	4	4	6	2	4	2	3	5	2	3	4		43	17	21	81
3	2	4	6	1	2	6	2	6	2	2	6	2	2	2	3	6	6	6	2	6	6		22	13	8	43
3	3	3	5	1	3	3	2	4	2	1	5	3	3	2	2	2	3	3	3	3	3		25	9	28	62
1	1	1	1	1	1	1	1	1	1	1	1	1	1	1	1	1	1	1	1	1	1		9	5	48	62
1	6	6	6	1	1	6	6	6	1	1	6	6	6	1	1	6	6	6	1	6	1		34	5	8	47
2	2	2	5	1	2	4	1	2	1	1	5	2	2	1	1	3	5	3	1	5	4		15	8	24	47
1	2	2	2	1	1	2	1	2	1	1	6	1	1	1	2	6	6	6	1	6	2		12	6	20	38
4	4	4	4	4	5	4	4	3	4	4	5	4	4	4	4	4	4	4	4	4	4		37	20	24	81
5	5	6	6	1	4	5	5	5	3	2	4	4	5	2	2	4	4	5	3	3	1		39	9	20	68
4	6	6	5	5	6	5	6	5	5	4	5	5	5	5	5	5	4	4	4	5	4		47	23	18	88
6	6	6	5	1	6	2	6	6	6	1	1	6	6	2	1	3	1	1	6	6	6		49	16	31	96
4	6	5	6	4	2	6	6	4	1	1	3	3	3	2	1	6	6	4	2	4	2		32	10	17	59
2	2	2	6	1	1	6	2	6	1	1	6	1	2	1	1	6	6	6	1	6	1		14	5	8	27
4	5	4	5	1	4	4	4	6	1	1	3	2	6	1	1	5	1	6	4	4	4		34	8	22	64
6	6	5	5	6	6	6	6	6	5	6	4	4	6	6	6	6	3	3	4	4	3		49	26	19	94
1	1	1	6	1	1	6	1	6	1	1	6	1	1	1	1	6	6	6	1	2	2		9	6	12	27
5	5	5	5	5	5	5	5	5	5	5	5	5	5	5	5	5	5	5	5	5	5		45	25	16	86
6	6	6	6	6	6	6	6	6	6	6	6	6	6	6	6	6	6	6	6	6	6		54	30	8	92
2	4	4	6	6	2	6	2	6	1	1	6	2	4	1	1	6	6	6	1	1	1		22	10	13	45
4	4	2	6	1	3	4	4	5	1	1	6	2	4	1	1	6	6	4	1	6	5		25	9	13	47
2	3	4	6	1	2	2	2	4	1	1	5	2	2	1	1	6	5	6	2	6	2		20	6	16	42
2	2	2	4	1	2	3	2	2	1	2	2	2	2	2	2	2	3	2	2	4	2		18	8	34	60
5	5	5	6	1	1	1	2	5	3	1	5	2	2	1	1	1	1	5	1	6	1		24	7	26	57
2	2	1	5	1	1	6	1	1	1	1	4	2	2	1	1	2	4	3	1	2	3		13	7	29	49
3	5	6	4	3	5	1	6	6	2	2	2	4	4	1	1	2	3	3	3	4	1		37	9	31	77
4	5	4	6	1	2	6	4	6	1	2	5	2	5	1	4	5	5	5	2	4	2		32	7	14	53
2	6	2	6	1	6	6	6	5	1	1	6	2	6	1	2	4	1	1	3	6	6		35	10	21	66
2	4	4	5	1	2	4	2	5	1	2	5	2	3	1	1	4	6	4	1	5	3		21	8	18	47
2	5	4	6	1	2	6	2	2	1	1	5	2	6	1	2	5	5	5	2	5	2		27	6	17	50
4	4	4	3	4	4	4	4	4	4	4	4	4	4	4	4	4	3	4	4	4	4		36	20	26	82
2	4	5	6	4	2	6	4	6	1	1	5	2	4	1	1	6	6	6	1	6	2		25	9	9	43
2	5	2	6	1	2	6	2	6	1	1	5	2	6	1	2	6	6	6	1	6	2		24	6	9	39
4	5	5	5	1	3	6	1	1	1	1	5	4	4	1	4	1	5	5	1	5	5		31	9	23	63
4	5	6	4	1	4	4	3	3	4	1	5	3	4	4	3	4	3	4	4	4	4		36	14	25	75
4	5	6	5	4	5	5	4	5	2	4	3	4	4	1	2	5	5	5	4	5	5		38	16	18	72
2	2	2	6	1	1	6	1	6	1	1	6	2	2	1	1	6	5	5	5	6	2		18	6	10	34
4	4	4	5	1	3	2	4	2	2	2	6	4	1	1	1	6	6	6	1	6	1		26	7	17	50
6	6	6	6	4	5	5	5	2	2	1	3	3	6	1	6	5	4	2	6	5	6		49	14	24	87
1	1	1	1	1	1	1	1	1	1	1	6	1	1	6	1	1	1	6	6	6	6		14	15	33	62
2	2	1	4	1	2	4	2	4	1	1	6	2	2	5	1	6	6	6	2	4	2		16	10	16	42
6	6	6	6	6	6	6	6	6	6	6	6	6	6	6	6	6	6	6	6	6	6		54	30	8	92
2	5	6	6	1	2	4	4	2	1	2	4	2	4	1	1	4	4	2	1	2	1		27	6	28	61
4	4	4	5	1	1	1	1	1	3	1	3	3	4	1	2	6	6	6	4	6	6		27	12	22	61
6	6	6	6	1	6	6	6	6	1	1	6	1	6	1	1	6	6	6	1	6	6		39	10	8	57
5	5	4	6	6	4	4	4	6	1	1	5	4	4	1	2	5	5	5	5	5	2		37	11	15	63
1	2	2	6	1	1	6	1	6	1	1	5	1	1	1	1	6	6	6	1	6	1		11	5	9	25
2	1	4	6	1	2	6	6	6	1	1	6	2	2	1	1	6	6	6	1	6	1		21	5	8	34
2	2	2	6	1	1	2	1	1	1	1	6	2	2	1	1	6	6	6	2	2	2		15	6	21	42
4	4	2	5	2	2	6	5	5	2	2	5	2	4	4	2	6	6	6	2	6	4		27	14	11	52
2	4	5	6	6	2	6	2	5	1	1	6	2	4	1	1	6	6	6	2	2	5		24	14	13	51
2	2	4	4	1	2	2	2	2	1	1	2	2	6	2	2	2	1	1	2	2	2		24	7	40	71
1	1	1	6	1	1	6	1	6	1	1	6	1	1	1	1	6	6	6	1	6	1		9	5	8	22
5	4	6	6	5	4	6	6	6	5	1	1	3	6	1	1	6	6	6	1	6	2		36	14	13	63
6	6	5	5	6	6	5	6	6	4	6	5	5	6	6	6	5	5	2	5	6	6		51	28	17	96
5	5	5	5	5	5	5	5	5	5	5	6	5	4	4	4	4	4	5	5	5	5		43	24	17	84
3	4	4	6	1	2	6	6	6	1	1	6	2	4	1	1	6	6	6	1	6	1		27	5	8	40
5	5	6	5	2	6	5	5	5	4	5	6	5	6	4	4	4	4	3	4	5	5		46	20	19	85
1	1	1	1	1	1	1	1	1	1	1	1	1	1	1	1	1	1	1	1	1	1		9	5	48	62
4	4	4	4	1	2	4	2	3	1	2	2	4	4	2	2	2	2	2	4	3	5		30	11	34	75
2	2	2	6	1	1	2	2	6	2	2	6	2	2	1	2	6	5	6	1	5	6		16	12	14	42
1	4	4	6	1	2	5	3	6	1	1	5	1	3	1	1	5	6	5	1	5	2		20	6	13	39
2	4	4	6	1	2	5	4	6	1	1	2	2	3	1	1	5	6	6	1	5	2		23	6	15	44
2	2	2	6	1	1	2	2	4	1	1	6	2	2	1	1	6	6	6	1	6	1		15	5	14	34
4	4	4	5	1	4	6	5	4	1	1	6	2	4	1	1	5	5	5	1	2	2		29	6	18	53
1	2	2	6	1	1	6	2	4	1	1	5	2	4	1	1	6	6	6	1	5	1		16	5	12	33
6	6	6	6	6	6	6	6	6	6	6	3	6	6	6	6	6	6	6	6	6	6		54	30	11	95
4	4	2	6	3	2	4	2	2	1	1	3	3	3	1	1	4	4	2	1	2	2		22	8	29	59
5	5	5	6	4	3	5	4	5	2	3	4	3	4	1	1	1	1	6	1	6	4		31	14	22	67
1	3	3	6	1	1	5	1	6	1	1	6	1	2	1	1	5	6	6	1	4	2		14	6	12	32
2	6	1	6	1	2	1	1	1	1	1	6	1	1	1	1	1	2	1	1	2	1		16	5	36	57
3	6	4	6	1	3	6	6	6	1	1	6	3	6	1	1	6	6	6	1	6	1		33	5	8	46
2	4	2	4	1	2	6	2	2	1	1	6	2	2	1	2	6	6	6	1	2	1		19	5	18	42
2	5	1	6	1	2	6	1	6	1	1	6	1	2	1	3	6	6	6	1	4	4		18	8	10	36
4	4	6	6	1	1	4	1	1	1	1	6	1	1	1	1	4	6	6	1	6	3		20	7	17	44
2	2	2	1	1	2	6	2	6	1	1	6	1	2	1	1	6	6	6	1	6	2		15	6	13	34
2	6	2	6	2	2	4	2	4	2	2	2	2	2	2	2	4	4	1	2	2	1		22	9	29	60
2	5	2	6	1	1	6	2	6	1	1	5	2	2	1	1	1	6	6	1	6	4		18	8	14	40
4	5	3	6	1	4	2	4	1	1	1	4	2	4	1	1	6	6	6	4	4	1		31	5	21	57
4	4	4	6	1	2	5	2	5	1	1	5	2	2	1	2	5	5	4	2	5	5		24	9	16	49
1	2	1	2	1	1	2	1	1	1	1	6	1	1	1	1	1	6	6	1	1	1		10	5	31	46
4	6	6	6	1	6	5	5	5	1	1	5	4	4	1	2	5	5	5	1	6	5		38	9	14	61
2	2	2	5	1	2	2	2	4	2	1	1	2	2	1	1	6	6	6	2	2	2		17	7	24	48
2	2	2	6	1	2	4	2	6	1	1	4	2	2	1	2	6	6	6	2	6	1		18	5	12	35
6	5	5	6	1	5	6	6	6	1	6	5	6	6	5	6	6	6	6	6	6	6		51	19	9	79
4	4	4	6	1	4	4	4	1	1	1	4	2	2	1	2	1	1	1	4	4	2		30	6	34	70
4	4	4	5	4	4	4	4	4	1	2	5	2	2	1	1	5	4	4	4	4	4		29	12	21	62
1	2	1	4	1	1	2	1	5	1	1	2	2	1	1	1	6	5	6	1	5	1		11	5	21	37
2	3	2	5	1	3	5	1	5	1	1	4	2	2	1	2	4	3	4	1	5	5		18	9	21	48
3	3	1	6	6	4	6	3	6	1	1	3	2	3	1	3	6	6	6	3	6	3		25	12	11	48
1	1	6	6	1	1	6	1	6	1	1	6	1	2	1	1	6	6	6	1	6	1		15	5	8	28
4	4	4	5	1	3	6	5	6	1	2	3	3	4	1	2	5	4	4	4	5	2		33	7	18	58
2	2	1	6	1	1	6	1	6	1	1	6	1	1	1	1	6	6	6	1	6	1		11	5	8	24
5	5	5	6	2	2	6	5	6	2	1	5	2	5	1	1	5	5	2	2	6	2		32	8	15	55
5	3	2	6	1	1	4	1	6	1	1	6	1	2	1	2	2	6	6	1	2	2		18	6	18	42
2	2	2	4	1	1	6	2	2	1	1	4	1	2	1	1	3	4	4	1	4	1		14	5	25	44
2	4	4	6	1	2	2	2	6	1	1	5	2	2	6	1	2	6	6	2	2	2		21	11	21	53
2	6	4	6	1	2	6	2	1	1	1	2	2	5	1	2	4	1	1	2	5	1		27	5	30	62
2	2	1	5	1	1	6	1	4	1	1	6	2	1	1	2	2	4	6	1	2	1		13	5	21	39
4	5	4	6	1	2	6	3	4	4	4	5	1	2	1	1	6	6	6	1	6	2		23	12	11	46
3	4	4	5	2	3	5	2	2	2	2	3	2	2	4	2	4	2	2	2	4	2		24	12	29	65
2	2	2	6	1	2	6	1	6	1	1	6	1	1	1	1	6	6	6	1	6	2		13	6	8	27
2	2	2	5	1	2	5	2	5	1	1	5	2	2	1	1	2	4	6	1	4	1		16	5	20	41
2	2	2	2	2	2	2	2	2	2	2	2	2	2	2	2	2	2	2	2	2	2		18	10	40	68
2	2	2	5	5	5	4	4	4	4	4	4	4	4	4	4	4	4	4	4	5	5		31	22	22	75
2	2	3	6	1	1	2	2	2	1	1	2	3	3	1	1	1	2	1	2	2	1		19	5	38	62
2	2	2	2	2	2	2	2	2	2	2	5	2	2	1	1	6	6	6	1	6	3		16	10	21	47
2	2	2	6	1	2	2	2	2	1	1	6	2	2	1	2	2	2	2	1	2	2		17	6	32	55
1	1	1	6	1	1	6	1	6	1	6	6	1	1	1	1	6	6	6	1	6	1		9	10	8	27
1	1	1	6	1	1	6	1	6	1	1	6	1	1	1	1	6	6	6	1	6	1		9	5	8	22
2	2	6	6	1	2	6	5	6	1	1	5	2	2	1	5	6	6	6	1	6	2		27	6	9	42
6	6	1	6	1	1	1	1	1	1	1	6	1	1	1	1	6	6	6	1	6	1		19	5	18	42
1	1	1	4	1	1	6	1	6	1	1	6	1	1	1	1	6	6	6	1	2	1		9	5	14	28
2	2	2	6	1	2	6	3	6	1	1	6	2	2	1	1	6	6	6	1	6	2		17	6	8	31
1	6	6	6	1	1	6	6	6	1	6	6	1	1	1	1	6	6	6	1	6	4		24	13	8	45
6	6	6	6	1	6	6	1	6	1	1	6	6	6	1	1	6	6	6	6	6	6		44	10	8	62
2	4	6	6	1	1	4	5	6	1	1	4	2	4	1	1	5	4	6	1	4	4		26	8	17	51
1	1	1	6	1	1	6	1	6	1	1	6	1	1	1	1	6	6	6	1	6	1		9	5	8	22
5	5	2	2	1	1	1	1	6	1	1	6	1	5	1	1	6	6	6	1	6	1		22	5	17	44
2	4	4	6	1	2	5	2	6	1	1	5	2	6	1	2	6	6	6	1	6	2		25	6	10	41
2	2	2	6	1	1	2	2	2	1	1	6	2	2	1	1	6	6	5	2	5	1		16	5	18	39
3	2	1	5	1	2	6	1	6	1	1	5	2	2	1	1	5	5	5	1	5	2		15	6	14	35
2	1	1	5	1	1	6	1	6	1	1	5	2	2	1	1	5	5	6	1	5	1		12	5	13	30
4	4	4	5	4	4	4	4	4	4	4	4	4	4	4	3	4	4	4	4	4	4		35	20	23	78
4	4	4	4	4	3	3	3	3	3	3	5	4	6	4	4	4	3	3	4	4	4		36	18	27	81
4	3	4	5	4	4	4	4	5	3	3	5	4	5	2	4	4	4	4	3	5	4		35	16	20	71
2	2	2	4	1	2	4	2	5	1	1	4	2	2	1	1	6	6	6	1	4	1		16	5	17	38
2	4	4	6	1	1	6	4	6	1	1	5	4	4	1	2	6	4	4	4	5	2		29	6	14	49
4	4	4	2	4	4	4	4	2	4	4	2	4	5	5	5	4	4	5	4	4	4		38	21	29	88
2	2	2	5	1	2	5	2	6	1	1	5	2	2	1	1	5	5	5	1	5	1		16	5	15	36
2	3	3	4	4	5	6	3	4	3	5	5	2	3	1	2	3	3	5	3	4	2		26	15	22	63
2	3	3	3	2	2	3	2	2	2	2	4	2	2	3	2	3	3	3	1	3	2		19	11	32	62
5	2	2	6	1	1	6	2	4	2	1	6	2	2	1	1	5	6	5	1	5	5		18	10	13	41
4	4	5	4	4	5	6	5	5	4	5	5	4	5	5	4	5	5	4	5	6	4		41	22	16	79
4	5	5	5	5	4	5	5	4	4	5	4	5	4	5	5	4	5	4	5	4	5		42	24	21	87
4	4	4	5	4	3	3	4	5	4	4	4	5	4	4	4	4	4	4	4	4	4		36	20	23	79
4	4	3	3	3	4	4	4	5	4	3	3	4	4	3	4	3	4	3	3	3	3		34	16	28	78
1	4	4	6	1	2	6	2	6	1	1	5	2	2	1	1	6	6	6	1	6	1		19	5	9	33
																										55.4423	18.6218
